# Supplementary material for: Plant functional traits determined the latitudinal variations in soil microbial functions: evidence from a forest transect in China
Source: Copernicus journal article supplement (doi:10.5194/bg-2018-499), 2019-01-24
Supplement: Supplementary file 1 [file bg-2018-499-supplement.pdf]

Table S1 Average values of forest soil enzyme activity and different group of PLFAs along the NSTEC.

| Sampling site | Enzyme activities |          |          |           |          | PLFAs     |          |         |            |                |                |                                |
|---------------|-------------------|----------|----------|-----------|----------|-----------|----------|---------|------------|----------------|----------------|--------------------------------|
|               | BG                | NAG      | LAP      | AP        | tPLFA    | Bacteria  | Fungi    | Acti-   | F/B        | G <sup>+</sup> | G <sup>-</sup> | G <sup>+</sup> /G <sup>-</sup> |
| HZ            | 244±8.6           | 111±5.5  | 41±0.8   | 459±5.0   | 17.7±1.2 | 9.4 ±0.4  | 0.9±0.1  | 0.4±0.2 | 0.09 ±0.01 | 4.5±0.4        | 4.23±0.2       | 1.4±0.1                        |
| LS            | 203±12.0          | 68±6.6   | 60±0.8   | 3297±17.5 | 16.8±1.2 | 7.9±0.4   | 0.6±0.1  | 0.5±0.4 | 0.06±0.01  | 4.5±0.4        | 2.88±0.1       | 1.6±0.1                        |
| CB            | 520±52.3          | 115±2.4  | 545±15.5 | 1213±90.6 | 22.2±1.9 | 12.3± 1.0 | 0.4±0.1  | 0.8±0.1 | 0.05±0.02  | 7.3± 0.4       | 3.21±0.9       | 1.6±0.1                        |
| DL            | 266±2.5           | 122±12.9 | 101±10.9 | 407±6.9   | 13.5±0.9 | 5.4±0.7   | 2.4±0.3  | 0.3±0.3 | 0.36±0.02  | 3.52±0.3       | 1.92±0.1       | 2.1±0.1                        |
| TY            | 267±21.9          | 189±2.4  | 367±11.1 | 356±41.0  | 8.0±0.3  | 3.7±0.1   | 0.3±0.1  | 0.2±0.1 | 0.07±0.01  | 1.85±0.1       | 1.53±0.1       | 1.2±0.1                        |
| SN            | 163±10.7          | 70±3.6   | 111±1.3  | 239±8.6   | 12.2±0.5 | 6.2±0.3   | 0.3±0.1  | 0.3±0.1 | 0.05±0.01  | 3.02±0.1       | 2.76±0.2       | 1.1±0.1                        |
| JL            | 67±4.3            | 35±0.5   | 83±2.9   | 845±33.2  | 9.8±0.8  | 4.2±0.2   | 0.7±0.3  | 0.3±0.1 | 0.15±0.04  | 3.17±0.2       | 1.18±0.4       | 3.1±1.0                        |
| DH            | 71±0.4            | 20±1.2   | 81±0.4   | 1075±13.6 | 10.0±0.5 | 5.6±0.2   | 0.9±0.1  | 0.3±0.1 | 0.16±0.01  | 3.75±0.2       | 1.46±0.1       | 2.5±0.6                        |
| JF            | 37±3.4            | 14±3.1   | 77±1.4   | 656±40.5  | 7.9±1.2  | 4.4±0.5   | 0.6± 0.3 | 0.3±0.1 | 0.11±0.05  | 3.16±0.4       | 1.68±0.1       | 2.2±0.1                        |

All values are presented as means ± SE (n=4). The enzyme activity (nmol·h<sup>-1</sup> g<sup>-1</sup> dry soil) and PLFAs (nmol·g<sup>-1</sup> dry soil). C acquisition is represented by β-1,4-glucosidase (BG); N acquisition is measured by the potential activities of β-1,4-N-acetylglucosaminidase (NAG) and leucine aminopeptidase (LAP); P acquisition is measured as acid (alkaline) phosphatase (AP) activity. tPLFA, total PLFAs, Acti-, actinomycetes, F/B, fungi/bacteria; G<sup>+</sup>/G<sup>-</sup>, Gram-positive bacteria/ Gram-negative bacteria. The abbreviations of the sampling sites were showed in table 1.

**Table S2** The plant diversity and community weighted means of plant functional traits

| Sites | H'   | LDMC<br>(mg g <sup>-1</sup> ) | SLA<br>(m <sup>2</sup> kg <sup>-1</sup> ) | Leaf C<br>(g kg <sup>-1</sup> ) | Leaf N<br>(g kg <sup>-1</sup> ) |
|-------|------|-------------------------------|-------------------------------------------|---------------------------------|---------------------------------|
| HZ    | 0.53 | 365.6                         | 8.5                                       | 487.5                           | 19.4                            |
| LS    | 2.05 | 345.5                         | 12.1                                      | 441.6                           | 18.5                            |
| CB    | 2.14 | 287.8                         | 18.5                                      | 108.7                           | 6.12                            |
| DL    | 2.74 | 408.1                         | 11.3                                      | 447.6                           | 25.1                            |
| TY    | 1.01 | 421.6                         | 9.5                                       | 494.0                           | 19.5                            |
| SN    | 2.61 | 289.8                         | 8.7                                       | 332.7                           | 13.5                            |
| JL    | 2.73 | 359.3                         | 6.2                                       | 392.6                           | 14.2                            |
| DH    | 2.09 | 412.2                         | 6.4                                       | 463.1                           | 16.2                            |
| JF    | 4.08 | nd                            | nd                                        | nd                              | nd                              |

H': the diversity of the tree species; LDMC: the oven-dried mass of a leaf divided by its water-saturated fresh mass, SLA: the one-sided area of a fresh leaf divided by its oven-dried mass; Leaf C: Leaf carbon concentration; Leaf N: Leaf nitrogen concentration. nd: none detected. The abbreviations of the sampling sites were showed in table 1.

**Table S3** The soil organic matter (SOM) decomposition rates during the 28 days of incubation time (Mean  $\pm$  SE) ( $\mu\text{gC}\cdot\text{g}^{-1}\text{d}^{-1}$ )

| Sites | 1d               | 7d               | 14d              | 21d              | 28d              | Average          |
|-------|------------------|------------------|------------------|------------------|------------------|------------------|
| HZ    | 3.23 $\pm$ 0.24c | 4.69 $\pm$ 0.27a | 3.40 $\pm$ 0.17b | 3.64 $\pm$ 0.03a | 2.19 $\pm$ 0.13b | 3.43 $\pm$ 0.09b |
| LS    | 6.17 $\pm$ 0.19a | 4.60 $\pm$ 0.44a | 4.97 $\pm$ 0.17a | 3.83 $\pm$ 0.17a | 3.47 $\pm$ 0.02a | 4.61 $\pm$ 0.14a |
| CB    | 3.74 $\pm$ 0.13b | 4.27 $\pm$ 0.23b | 3.36 $\pm$ 0.13b | 4.11 $\pm$ 0.09a | 3.41 $\pm$ 0.43a | 3.78 $\pm$ 0.14b |
| DL    | 2.82 $\pm$ 0.13d | 2.66 $\pm$ 0.08c | 1.96 $\pm$ 0.04c | 2.38 $\pm$ 0.02c | 2.10 $\pm$ 0.12b | 2.38 $\pm$ 0.05d |
| TY    | 3.92 $\pm$ 0.27b | 3.87 $\pm$ 0.20b | 3.75 $\pm$ 0.36b | 3.77 $\pm$ 0.04a | 3.50 $\pm$ 0.06a | 3.76 $\pm$ 0.04b |
| SN    | 6.36 $\pm$ 0.19a | 5.36 $\pm$ 0.24a | 3.87 $\pm$ 0.08b | 3.19 $\pm$ 0.16b | 2.56 $\pm$ 0.14b | 4.27 $\pm$ 0.10a |
| JL    | 2.88 $\pm$ 0.08d | 2.29 $\pm$ 0.09c | 2.40 $\pm$ 0.08c | 2.70 $\pm$ 0.08c | 1.82 $\pm$ 0.03c | 2.42 $\pm$ 0.04d |
| DH    | 0.74 $\pm$ 0.05e | 0.58 $\pm$ 0.06d | 0.33 $\pm$ 0.01d | 1.03 $\pm$ 0.12d | 0.53 $\pm$ 0.07e | 0.64 $\pm$ 0.04f |
| JF    | 2.21 $\pm$ 0.06d | 1.71 $\pm$ 0.20c | 1.72 $\pm$ 0.29c | 3.14 $\pm$ 0.09b | 1.30 $\pm$ 0.03d | 2.02 $\pm$ 0.11e |

Data labeled with different letters indicated soil organic matter (SOM) decomposition rates were significantly different at  $P < 0.01$ . The abbreviations of the sampling sites were given in the Table 1.

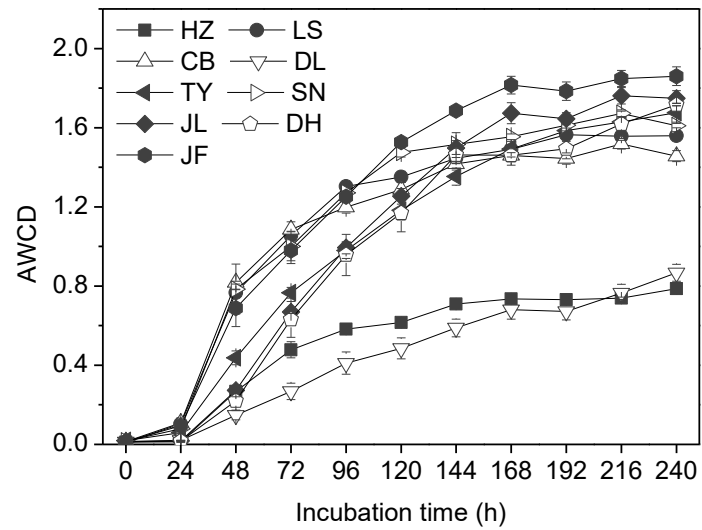

**Fig.S1** Variation of the average well color development (AWCD) values during a 240-h incubation for the nine forests. The abbreviations of the sampling sites were showed in table 1.
