# Supplementary material for: Plant functional traits determined the latitudinal variations in soil microbial functions: evidence from a forest transect in China
Source: Copernicus journal article supplement (doi:10.5194/bg-2018-499), 2019-01-24
Supplement: Supplementary file [file bg-2018-499-AC1-supplement.pdf]

Table S1 Average values of forest soil enzyme activity and different group of PLFAs along the NSTEC.

| Sampling site | Enzyme activities |          |          |           |          | PLFAs     |          |         |            |                |                |                                |
|---------------|-------------------|----------|----------|-----------|----------|-----------|----------|---------|------------|----------------|----------------|--------------------------------|
|               | BG                | NAG      | LAP      | AP        | tPLFA    | Bacteria  | Fungi    | Acti-   | F/B        | G <sup>+</sup> | G <sup>-</sup> | G <sup>+</sup> /G <sup>-</sup> |
| HZ            | 244±8.6           | 111±5.5  | 41±0.8   | 459±5.0   | 17.7±1.2 | 9.4 ±0.4  | 0.9±0.1  | 0.4±0.2 | 0.09 ±0.01 | 4.5±0.4        | 4.23±0.2       | 1.4±0.1                        |
| LS            | 203±12.0          | 68±6.6   | 60±0.8   | 3297±17.5 | 16.8±1.2 | 7.9±0.4   | 0.6±0.1  | 0.5±0.4 | 0.06±0.01  | 4.5±0.4        | 2.88±0.1       | 1.6±0.1                        |
| CB            | 520±52.3          | 115±2.4  | 545±15.5 | 1213±90.6 | 22.2±1.9 | 12.3± 1.0 | 0.4±0.1  | 0.8±0.1 | 0.05±0.02  | 7.3± 0.4       | 3.21±0.9       | 1.6±0.1                        |
| DL            | 266±2.5           | 122±12.9 | 101±10.9 | 407±6.9   | 13.5±0.9 | 5.4±0.7   | 2.4±0.3  | 0.3±0.3 | 0.36±0.02  | 3.52±0.3       | 1.92±0.1       | 2.1±0.1                        |
| TY            | 267±21.9          | 189±2.4  | 367±11.1 | 356±41.0  | 8.0±0.3  | 3.7±0.1   | 0.3±0.1  | 0.2±0.1 | 0.07±0.01  | 1.85±0.1       | 1.53±0.1       | 1.2±0.1                        |
| SN            | 163±10.7          | 70±3.6   | 111±1.3  | 239±8.6   | 12.2±0.5 | 6.2±0.3   | 0.3±0.1  | 0.3±0.1 | 0.05±0.01  | 3.02±0.1       | 2.76±0.2       | 1.1±0.1                        |
| JL            | 67±4.3            | 35±0.5   | 83±2.9   | 845±33.2  | 9.8±0.8  | 4.2±0.2   | 0.7±0.3  | 0.3±0.1 | 0.15±0.04  | 3.17±0.2       | 1.18±0.4       | 3.1±1.0                        |
| DH            | 71±0.4            | 20±1.2   | 81±0.4   | 1075±13.6 | 10.0±0.5 | 5.6±0.2   | 0.9±0.1  | 0.3±0.1 | 0.16±0.01  | 3.75±0.2       | 1.46±0.1       | 2.5±0.6                        |
| JF            | 37±3.4            | 14±3.1   | 77±1.4   | 656±40.5  | 7.9±1.2  | 4.4±0.5   | 0.6± 0.3 | 0.3±0.1 | 0.11±0.05  | 3.16±0.4       | 1.68±0.1       | 2.2±0.1                        |

All values are presented as means ± SE (n=4). The enzyme activity (nmol·h<sup>-1</sup> g<sup>-1</sup> dry soil) and PLFAs (nmol·g<sup>-1</sup> dry soil). C acquisition is represented by β-1,4-glucosidase (BG); N acquisition is measured by the potential activities of β-1,4-N-acetylglucosaminidase (NAG) and leucine aminopeptidase (LAP); P acquisition is measured as acid (alkaline) phosphatase (AP) activity. tPLFA, total PLFAs, Acti-, actinomycetes, F/B, fungi/bacteria; G<sup>+</sup>/G<sup>-</sup>, Gram-positive bacteria/ Gram-negative bacteria. The abbreviations of the sampling sites were showed in table 1.

**Table S2** The plant diversity and community weighted means of plant functional traits

| Sites | H'   | LDMC<br>(mg g <sup>-1</sup> ) | SLA<br>(m <sup>2</sup> kg <sup>-1</sup> ) | Leaf C<br>(g kg <sup>-1</sup> ) | Leaf N<br>(g kg <sup>-1</sup> ) |
|-------|------|-------------------------------|-------------------------------------------|---------------------------------|---------------------------------|
| HZ    | 0.53 | 365.6                         | 8.5                                       | 487.5                           | 19.4                            |
| LS    | 2.05 | 345.5                         | 12.1                                      | 441.6                           | 18.5                            |
| CB    | 2.14 | 287.8                         | 18.5                                      | 108.7                           | 6.12                            |
| DL    | 2.74 | 408.1                         | 11.3                                      | 447.6                           | 25.1                            |
| TY    | 1.01 | 421.6                         | 9.5                                       | 494.0                           | 19.5                            |
| SN    | 2.61 | 289.8                         | 8.7                                       | 332.7                           | 13.5                            |
| JL    | 2.73 | 359.3                         | 6.2                                       | 392.6                           | 14.2                            |
| DH    | 2.09 | 412.2                         | 6.4                                       | 463.1                           | 16.2                            |
| JF    | 4.08 | nd                            | nd                                        | nd                              | nd                              |

H': the diversity of the tree species; LDMC: the oven-dried mass of a leaf divided by its water-saturated fresh mass, SLA: the one-sided area of a fresh leaf divided by its oven-dried mass; Leaf C: Leaf carbon concentration; Leaf N: Leaf nitrogen concentration. nd: none detected. The abbreviations of the sampling sites were showed in table 1.

**Table S3** The soil organic matter (SOM) decomposition rates during the 28 days of incubation time (Mean  $\pm$  SE) ( $\mu\text{gC}\cdot\text{g}^{-1}\text{d}^{-1}$ )

| Sites | 1d               | 7d               | 14d              | 21d              | 28d              | Average          |
|-------|------------------|------------------|------------------|------------------|------------------|------------------|
| HZ    | 3.23 $\pm$ 0.24c | 4.69 $\pm$ 0.27a | 3.40 $\pm$ 0.17b | 3.64 $\pm$ 0.03a | 2.19 $\pm$ 0.13b | 3.43 $\pm$ 0.09b |
| LS    | 6.17 $\pm$ 0.19a | 4.60 $\pm$ 0.44a | 4.97 $\pm$ 0.17a | 3.83 $\pm$ 0.17a | 3.47 $\pm$ 0.02a | 4.61 $\pm$ 0.14a |
| CB    | 3.74 $\pm$ 0.13b | 4.27 $\pm$ 0.23b | 3.36 $\pm$ 0.13b | 4.11 $\pm$ 0.09a | 3.41 $\pm$ 0.43a | 3.78 $\pm$ 0.14b |
| DL    | 2.82 $\pm$ 0.13d | 2.66 $\pm$ 0.08c | 1.96 $\pm$ 0.04c | 2.38 $\pm$ 0.02c | 2.10 $\pm$ 0.12b | 2.38 $\pm$ 0.05d |
| TY    | 3.92 $\pm$ 0.27b | 3.87 $\pm$ 0.20b | 3.75 $\pm$ 0.36b | 3.77 $\pm$ 0.04a | 3.50 $\pm$ 0.06a | 3.76 $\pm$ 0.04b |
| SN    | 6.36 $\pm$ 0.19a | 5.36 $\pm$ 0.24a | 3.87 $\pm$ 0.08b | 3.19 $\pm$ 0.16b | 2.56 $\pm$ 0.14b | 4.27 $\pm$ 0.10a |
| JL    | 2.88 $\pm$ 0.08d | 2.29 $\pm$ 0.09c | 2.40 $\pm$ 0.08c | 2.70 $\pm$ 0.08c | 1.82 $\pm$ 0.03c | 2.42 $\pm$ 0.04d |
| DH    | 0.74 $\pm$ 0.05e | 0.58 $\pm$ 0.06d | 0.33 $\pm$ 0.01d | 1.03 $\pm$ 0.12d | 0.53 $\pm$ 0.07e | 0.64 $\pm$ 0.04f |
| JF    | 2.21 $\pm$ 0.06d | 1.71 $\pm$ 0.20c | 1.72 $\pm$ 0.29c | 3.14 $\pm$ 0.09b | 1.30 $\pm$ 0.03d | 2.02 $\pm$ 0.11e |

Data labeled with different letters indicated soil organic matter (SOM) decomposition rates were significantly different at  $P < 0.01$ . The abbreviations of the sampling sites were given in the Table 1.

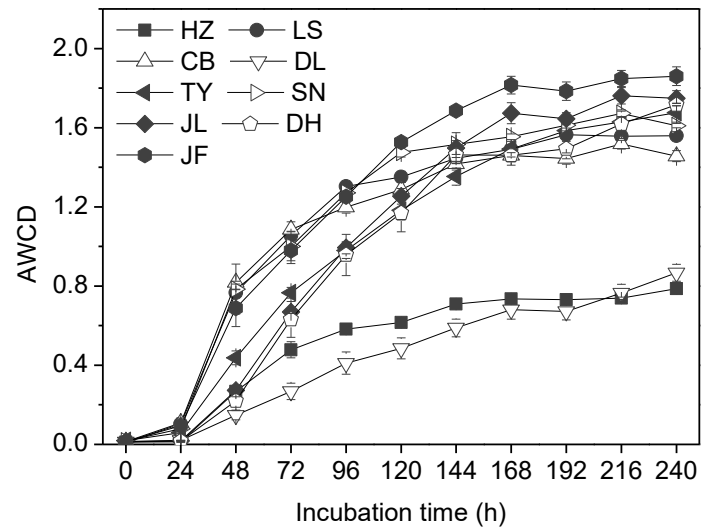

**Fig.S1** Variation of the average well color development (AWCD) values during a 240-h incubation for the nine forests. The abbreviations of the sampling sites were showed in table 1.

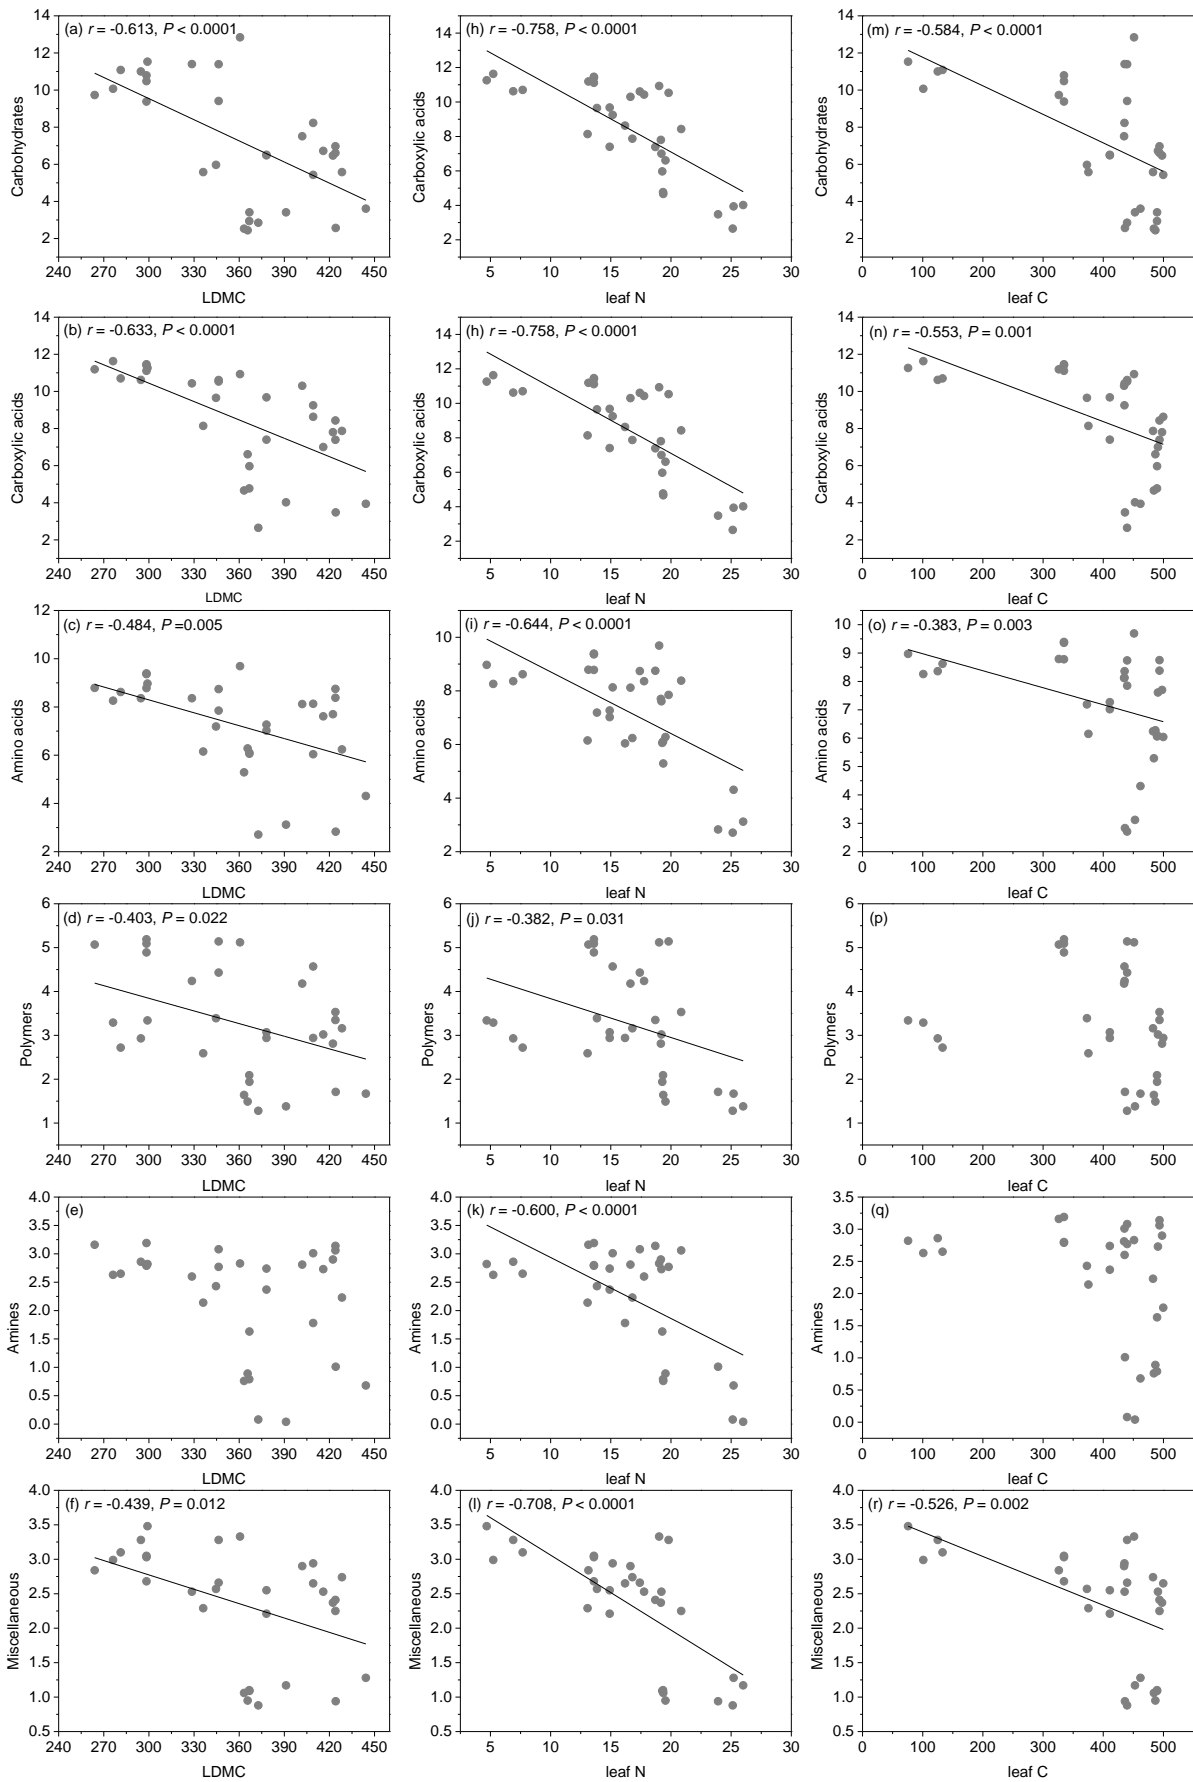

Fig.S2 The Pearson's correlation coefficients between the use of individual substrates and plant functional traits.
