# Supplementary material for: Plant functional traits determined the latitudinal variations in soil microbial functions: evidence from a forest transect in China
Source: Copernicus journal article supplement (doi:10.5194/bg-2018-499), 2019-01-24
Supplement: Supplementary file [file bg-2018-499-AC7-supplement.pdf]

# 1 **Plant functional traits determine latitudinal variations** 2 **in soil microbial function: evidence from forests in** 3 **China** 4

5 Zhiwei Xu<sup>1,2,3</sup>, Guirui Yu<sup>4,5,\*</sup>, Qiufeng Wang<sup>4,5,\*</sup>, Xinyu Zhang<sup>4,5</sup>, Ruili Wang<sup>6</sup>, Ning Zhao<sup>7</sup>, Nianpeng  
6 He<sup>3,4</sup>, Ziping Liu<sup>1,2,3</sup>

7 1. Institute for Peat and Mire Research, College of Geographical Sciences, Northeast Normal  
8 University, Changchun, 130024, China

9 2. Jilin Provincial Key Laboratory for Wetland Ecological Processes and Environmental Change in  
10 the Changbai Mountains, Changchun, 130024, China

11 3. Education Ministry Key Laboratory for Geography Process and Ecological Security in the  
12 Changbai Mountains, Changchun, 130024, China

13 4. Key Laboratory of Ecosystem Network Observation and Modeling, Institute of Geographic  
14 Sciences and Natural Resources Research, Chinese Academy of Sciences, Beijing 10010, China.

15 5. College of Resources and Environment, University of Chinese Academy of Sciences, Beijing,  
16 100190, China

17 6. College of Forestry, Northwest A&F University, Yangling, 712100, China

18 7. Key Laboratory of Remote Sensing of Gansu Province, Heihe Remote Sensing Experimental  
19 Research Station, Cold and Arid Regions Environmental and Engineering Research Institute,  
20 Chinese Academy of Sciences, Lanzhou 730000, China

21  
22  
23 \* Corresponding author at: Key Laboratory of Ecosystem Network Observation and Modeling,  
24 Institute of Geographic Sciences and Natural Resources Research, Chinese Academy of Sciences,  
25 Beijing 100101, China.No. 11A, Datun Road, Chaoyang District, Beijing, 100101, China. Tel.: +86-  
26 10-64889268; fax: +86 10 64889432.

27 E-mail: [yugr@igsnr.ac.cn](mailto:yugr@igsnr.ac.cn) (G. Y.), [qfwang@igsnr.ac.cn](mailto:qfwang@igsnr.ac.cn) (Q. W.)

28 **Abstract.** Plant functional traits have increasingly been studied as determinants of ecosystem  
29 properties, especially for soil biogeochemical processes. While the relationships between biological  
30 community structures and ecological functions are a central issue in ecological theory, these  
31 relationships remain poorly understood at the large scale. We selected nine forests along the North–  
32 South Transect of Eastern China (NSTEC) to determine how plant functional traits influence the  
33 latitudinal pattern of soil microbial functions, and how soil microbial communities and functions are  
34 linked at the regional scale. We found that there was considerable latitudinal variation in the profiles  
35 of different substrate use along the NSTEC. Specifically, we found that the substrate use by  
36 microorganisms was highest in the temperate forest soils (intensities of 10–12), followed by the  
37 subtropical forest soils (intensities of 7–10), and was least in the coniferous forest soils (intensities  
38 of 4–7). The latitudinal variation in soil microbial function was more closely related to plant  
39 functional traits ( $P=0.002$ ) than climate ( $P=0.022$ ). The soil silt, leaf dry matter, and leaf C and N  
40 contents were the main controls on the biogeographical patterns of microbial substrate use in these  
41 forest soils. The soil microbial community structures and functions were significantly correlated  
42 along the NSTEC. Soil carbohydrate and polymer substrate use were mainly related to soil G<sup>+</sup>  
43 bacterial and actinomycic PLFAs, while the use of amine and miscellaneous substrates were related  
44 to soil G<sup>-</sup> bacterial and fungal PLFAs. The enzyme production varied with changes in the soil  
45 microbial communities. The soil enzyme activities were positively correlated with the bacterial  
46 PLFAs but were not correlated with the fungal PLFAs. The soil organic matter (SOM) decomposition  
47 rates were significantly higher in the temperate forests than in the subtropical and tropical forests,  
48 emphasizing the rapid degradability of high-energy substrates, such as soil microbial biomass carbon,  
49 carbohydrates, and amino acids. The SOM decomposition rates were significantly and negatively  
50 related to soil dissolved organic carbon concentrations, carboxylic acids, polymers, and  
51 miscellaneous substrate use. The relationships between soil PLFAs and microbial substrate use,  
52 enzyme activities, and SOM decomposition rate show that, as the soil microbial community structure  
53 changes, soil biogeochemical processes also change.

|    |                              |                                       |
|----|------------------------------|---------------------------------------|
| 54 | <b>Abbreviations</b>         |                                       |
| 55 | NSTEC                        | North-South Transect of Eastern China |
| 56 | AWCD                         | Average well color development        |
| 57 | RDA                          | Redundancy analysis                   |
| 58 | Soil microbial community     |                                       |
| 59 | PLFAs                        | Phospholipid fatty-acids              |
| 60 | G <sup>+</sup>               | Gram positive bacteria                |
| 61 | G <sup>-</sup>               | Gram negative bacteria                |
| 62 | F/B                          | Fungi/Bacteria                        |
| 63 | Soil enzyme activities       |                                       |
| 64 | BG                           | β-glucosidase                         |
| 65 | NAG                          | N-acetylglucosaminidase               |
| 66 | AP                           | Acid phosphatase                      |
| 67 | LAP                          | Leucine aminopeptidase                |
| 68 | Soil properties              |                                       |
| 69 | SMC                          | Soil moisture content                 |
| 70 | SOM                          | Soil organic matter                   |
| 71 | SOC                          | Soil organic carbon                   |
| 72 | TN                           | Total Nitrogen                        |
| 73 | DOC                          | Dissolved organic carbon              |
| 74 | MBC                          | Microbial biomass carbon              |
| 75 | Silt                         | Soil silt fractions (<53 μm)          |
| 76 | Plant functional properties: |                                       |
| 77 | CWM                          | Community-weighted means              |
| 78 | SLA                          | The specific leaf area                |
| 79 | LDMC                         | Leaf dry matter content               |
| 80 | Leaf C                       | Leaf C concentrations                 |
| 81 | Leaf N                       | Leaf N concentrations                 |

## 82 **1 Introduction**

83 The catabolic diversity of soil microbial communities is a useful indicator of how microbial functions  
84 adapt to environmental stress. It can be used to test fundamental questions about soil biological  
85 resistance and resilience (Jagadamma et al., 2014; Swallow and Quideau, 2015), and help us  
86 understand the role of microbial communities in different environments (Preston-Mafham et al.,  
87 2002). Biological community structure and function are intimately linked in ecological processes,  
88 and their relationships are a central issue in ecological theory (Talbot et al., 2014). Therefore, a major  
89 goal in ecological research is to identify and understand the mechanisms and relationships that control  
90 the structure and function of microbial communities over large spatial scales.

91 Numerous studies have documented how environmental and anthropogenic perturbations  
92 impact on the structure, diversity (Tu et al., 2016; Zhou et al., 2016), and enzyme activities (Peng  
93 and Wang, 2016; Xu et al., 2017) of soil microbial communities, and have reported that forests in the  
94 same climatic zone develop similar microbial communities. Other researchers have examined spatial  
95 patterns in soil microbial function at different scales. For example, Tian et al. (2015), from their study  
96 of Changbai Mountain, China, found that the soil microbial metabolic activity and functional  
97 diversity were spatially dependent. Others reported that soil microbial activities varied by forest type,  
98 with high local variation and significant separation along regional climate gradients (Brockett et al.,  
99 2012; Cao et al., 2016). Soil microbes from different climatic zones have different affinities for  
100 carbon substrates. For example, microorganisms from boreal pine forest soils used carboxylic acids  
101 more efficiently, but decomposed amino acids much less efficiently, than microorganisms from  
102 temperate forest soils (Klimek et al., 2016). The soil microbial metabolic abilities are also influenced  
103 by the dominant tree species, through the production of chemically-unique litter and root exudates,  
104 and the soil physico-chemical properties (Menyailo et al., 2002). Despite this, because of limitations  
105 in analytical methods, questions still remain about how soil microbial functions vary at the regional  
106 scale.

107 The functional diversity of soil microbial communities is regulated by physico-chemical soil  
108 properties (Gartzia-Bengoetxea et al., 2016), climate (Cao et al., 2016), and the composition of plant  
109 cover (Sherman and Steinberger, 2012). For example, the geographic patterns in soil microbial

110 activities mainly reflect the climate, soil pH, and total phosphorus concentrations over large  
111 geographic scales (Cao et al., 2016). Research has shown that substrate-induced respiration rates  
112 were higher in soil microbial communities that developed under beech and holm oak forests than  
113 under oak and pine forests (Gartzia-Bengoetxea et al., 2016). Plant functional traits have increasingly  
114 been studied as determinants of ecosystem properties, especially for soil biogeochemical processes  
115 (De Vries et al., 2012; Pei et al., 2016). Soil bacteria phospholipid fatty-acids (PLFAs) were found  
116 to be positively correlated with the community-weighted means (CWM) of plant functional traits  
117 (leaf nitrogen (N) concentration) (De Vries et al., 2012). The plant leaf dry matter content and the  
118 leaf carbon (C) to nitrogen (N) ratio both influence the multivariate soil microbial community  
119 structure, and these factors positively promote the abundances of specific microbial functional groups  
120 (Pei et al., 2016). Limited soil resources, particularly in tropical forests, mean that soil  
121 microorganisms may be more reliant on plants than soil for C and nutrients via rhizosphere exudation  
122 or litter production, which varies among plant species (Russell et al., 2007; Raich et al., 2014; Waring  
123 et al., 2015). While soil functional diversity has been used as an indicator of microbial metabolic  
124 potential, there have been few studies of the integrated effects of climate, vegetation, and soil  
125 substrate availability on large-scale soil microbial functional diversity.

126 Although the functional characteristics of soil microorganisms are at least as important as their  
127 patterns of community structure in biogeochemical studies, the links between microbial community  
128 structure and microbial functions are poorly understood. There are two current hypotheses about how  
129 microbes determine ecosystem process rates. In functional redundancy, different microbes perform  
130 the same function and so changes in the microbial community structure do not necessarily lead to a  
131 change in soil function (Balsler and Firestone, 2005; Strickland et al., 2009). For example, Banerjee  
132 et al. (2016) showed that the abundance of different bacterial and fungal groups changed by up to  
133 300-fold under straw- and nutrient-amended treatments but that the decomposition rate remained  
134 similar, indicating possible functional redundancy. The functional redundancy hypothesis has  
135 recently been challenged by a counter-hypothesis, referred to as functional dissimilarity, which  
136 suggests that diversity brings stability, and that every species plays a unique role in ecosystem  
137 function (Fierer et al., 2007; Waldrop and Firestone, 2006). Soil microbial community composition  
138 therefore, combined with environmental variables, may ultimately determine ecosystem process rates.

139 Waldrop and Firestone (2006) showed that gram positive bacteria ( $G^+$ ) were mainly responsible for  
140 the decomposition of pine needles and soil organic matter, but gram negative bacteria ( $G^-$ ) were  
141 mainly responsible for the decomposition of starch and xylose, which are easy to break down.  
142 Philippot et al. (2013), when studying the diversity of denitrifiers, showed that the loss of microbial  
143 diversity could result in decreases of between 4- and 5-fold in denitrification activity. In the  
144 Mediterranean, losses in the mass of decomposing leaf litter from shrub species accelerated as  
145 detritivore assemblages became more functionally dissimilar (Coulis et al., 2015). **Research to date**  
146 **suggests that the different microbial communities will result in variations in soil microbial function**  
147 **and soil biochemical processes, so information about the relationships between soil microbial**  
148 **communities and their functions in natural ecosystems is urgently needed.**

149 The North-South Transect of Eastern China (NSTEC) extends from a cold temperate coniferous  
150 forest in the north to a tropical rainforest in the south, and includes almost all the forest types found  
151 in the Northern Hemisphere (Zhang and Yang, 1995) (Fig. 1 and Table 1). This transect, therefore,  
152 provides the optimal environment for investigating large-scale geographical patterns in microbial  
153 communities and their responses to environmental changes. In this study, we examined spatial  
154 patterns in soil labile C concentrations, soil organic matter (SOM) decomposition rates, and  
155 metabolic activity and functional diversity of microbes in nine forest biomes along the NSTEC. We  
156 assessed how abiotic factors, such as climate, soil physical and chemical properties, and biotic factors,  
157 in the form of community-weighted means (CWM) of plant functional traits, contributed to soil  
158 functional diversity at the regional scale. We also examined the links between soil microbial  
159 community structure (PLFAs) and function (SOM decomposition rate, enzyme activities, and  
160 microbial substrate use). **We tested four hypotheses in this study, as follows: (1) The profiles of soil**  
161 **microbial substrate use vary along a latitudinal gradient, (2) the functional characteristics of soil**  
162 **microbes are similar in closely related forest types, (3) biogeographical patterns of soil microbial**  
163 **substrate use are constrained by climate and plant functional traits, and (4) different soil microbial**  
164 **communities may have substrate use profiles and SOM decomposition rates.**

## 165 **2 Material and methods**

### 166 2.1 Study area and soil sampling

167 We selected nine forest ecosystems along the NSTEC, namely Huzhong (HZ), Liangshui (LS),  
168 Changbai (CB), Dongling (DL), Taiyue (TY), Shennong (SN), Jiulian (JL), Dinghu (DH), and  
169 Jianfeng (JF) (18°44'–51°46'N, 128°53'–108°51'E) (Fig. 1, Table 1). Further information about the  
170 soil types and sites has been documented previously by Xu et al. (2017). Forest soils have been  
171 classified following the U.S. soil taxonomy and are described in Table 1 (Soil Survey Staff, 2010),  
172 where information about the climate and the dominant vegetation at each site is also presented.

173 Soil samples were collected from four random plots at each site in July and August 2013, as  
174 described previously by Xu et al. (2017). Briefly, we established four sampling plots measured 30 ×  
175 40 m and collected soil samples from a depth of between 0 and 10 cm at between 30 and 50 points  
176 in each plot along an S-shape. On return to the laboratory, the fresh soil samples were immediately  
177 sieved through a 2-mm mesh and subdivided into three subsamples. One subsample was stored briefly  
178 at 4 °C until analysis for soil enzyme activities and soil pH. Another was stored briefly at –20 °C  
179 until analysis for PLFAs and Eco-Biolog. The third was air-dried, sieved through a 0.25 mm mesh,  
180 and analyzed for soil nutrients.

## 181 2.2 Soil chemical analyses

182 Soil pH was measured at a soil-to-water ratio of 1:2.5. The soil moisture content (SMC) was  
183 measured gravimetrically on 20 g fresh soil that was oven-dried at 105 °C to constant weight  
184 immediately on arrival at the study sites' laboratories (Liu et al., 2012a). Soil organic carbon (SOC)  
185 and total N (TN) concentrations were determined by dry combustion of ground samples (100-mesh)  
186 in a C/N analyzer (Elementar, Vario Max CN, Germany). Total phosphorus (TP) was determined  
187 with a flow injection auto-analyzer following digestion with H<sub>2</sub>SO<sub>4</sub>-HClO<sub>4</sub> (Huang et al., 2011).  
188 After extraction with distilled water at a soil:distilled water ratio of 1:5, dissolved organic carbon  
189 (DOC) concentrations were determined by Liqui TOC II (Elementar, Liqui TOC II, Germany) (Jones  
190 and Willett, 2006). Soil microbial biomass carbon (MBC) was measured using the chloroform  
191 fumigation and direct extraction technique (Vance et al., 1987). A conversion factor of 2.64 was used  
192 to convert extracted C to biomass C. The silt fractions (<53 μm) of the samples were separated by  
193 wet-sieving and then were freeze-dried in the laboratory, as described by Six et al. (2000). The soil  
194 properties are shown in Table 2. We followed the method described by Bååth et al. (2003) for PLFA

195 analysis and PLFAs are expressed in units of  $\text{nmol g}^{-1}$ . The four enzymatic activities of  $\beta$ -glucosidase  
196 (BG), N-acetylglucosaminidase (NAG), acid phosphatase (AP), and leucine aminopeptidase (LAP)  
197 responsible for soil C, N, and phosphorous cycling, were measured following the procedure outlined  
198 in Saiya-Cork et al. (2002) and are expressed in units of  $\text{nmol h}^{-1} \text{g}^{-1}$ . Information about PLFA and  
199 enzyme activities are presented in Table S1.

200 The Biolog-ECO plates were purchased from Biolog, US. The substrates for BG, NAG, AP, and  
201 LAP were 4-MUB- $\beta$ -D-glucoside, 4-MUB-N-acetyl-b-D-glucosaminide, 4-MUB-phosphate, and L-  
202 Leucine-7-amino-4-methylcoumarin, and were stored at  $-20^\circ\text{C}$ . An MUB standard was used for the  
203 BG, NAG, and AP enzymes and an AMC standard was used for the LAP enzyme. The substrates and  
204 standards were purchased Sigma. Analytical grade reagents were used for the soil nutrient analysis.

### 205 2.3 Vegetation data

206 We established four sampling plots ( $30\times 40$  m) in each forest ecosystem. In each plot, we recorded all  
207 the tree individuals, and measured the height and diameter-at-breast-height (DBH) of each woody  
208 individual with a  $\text{DBH}\geq 2$  cm. The diversity of the tree species in the sampling plots was represented  
209 by  $H'$ , and the diversity ( $H'$ , Shannon-Wiener) of the tree species in the community was calculated  
210 as follows:

$$211 H' = \sum_{i=0}^n (P_i \ln P_i)$$

212 Where  $P_i$  was the importance value of the species  $i$  as a proportion of all species, and  $n$  was the  
213 number of the species.

214 We also calculated the community-weighted means (CWM) values of the tree traits using the  
215 cover of each tree. As described by Xu et al. (2018), we collected litter and sun-exposed and mature  
216 leaves (leaf blades for trees) from between five and ten individuals of each plant species at each site  
217 and determined their TN and TC concentrations. We calculated the specific leaf area (SLA, the one-  
218 sided area of a fresh leaf divided by its oven-dried mass,  $\text{m}^2 \text{kg}^{-1}$ ), leaf dry matter content (LDMC,  
219 the oven-dried mass of a leaf divided by its water-saturated fresh mass,  $\text{mg g}^{-1}$ ), leaf C concentrations  
220 (leaf C,  $\text{g kg}^{-1}$ ), and leaf N concentrations (leaf N,  $\text{g kg}^{-1}$ ) for ten fully expanded leaves of each  
221 sampled individual. To measure the leaf traits at the community level, we calculated the CWM of the



222 tree layer, as follows:

$$223 \quad CWM = \sum_{i=1}^n p_i \times \text{trait}_i$$

224 Where  $p_i$  is the relative contribution of the species  $i$  to the cover of the whole community,  $n$  is the  
225 number of the most abundant species, and  $\text{trait}_i$  is the trait value of species  $i$ , as described by Garnier  
226 *et al.* (2004). The diversity of the tree species and plant functional traits are summarized in Table S2.

#### 227 2.4 Microbial substrate use

228 Microbial functional diversities were determined using a Biolog EcoPlate™ (Biolog Inc., Hayward,  
229 California, USA) as described by Garland and Mills (1991). Briefly, approximately 10 g of fresh soil  
230 was suspended in 100 ml saline solution (0.85% NaCl) and shaken on an orbital shaker for 30 min at  
231 190 rpm. A 150 µl aliquot of supernatant from 1:1 000 dilutions of each soil sample was added to  
232 each well. The plates were incubated at 25°C, and the absorbance at 590 nm was measured using a  
233 microplate reader (GENios Pro™, Tecan Trading AG, Männedorf, Switzerland) every 24 h up to 240  
234 h (0, 24, 48, 72, 96, 120, 144, 168, 192, 216, and 240 h).

235 The Richness ( $R$ ), Shannon-Weiner diversity index ( $H'$ ), Shannon evenness index ( $E$ ), and  
236 Simpson dominance index ( $D$ ) were calculated from the absorption values after EcoPlate™  
237 incubation for 96 h (Gomez *et al.*, 2006). Additionally, the 31 C sources were divided into six groups,  
238 namely carbohydrates, carboxylic acids, amines, amino acids, polymers, and miscellaneous, as  
239 suggested by Zak *et al.* (1994). The average absorbance of all C sources within each group was  
240 computed as the intensity of the single substrate use. The soil microbial metabolic intensities ( $S$ ) were  
241 estimated by the area underneath  $AWCD$  vs.  $t$ , and were obtained by integrating the equation against  
242 time  $t$  (Guckert *et al.*, 1996):

$$243 \quad S = \sum [(v_i + v_{i-1})/2 \times (t_i + t_{i-1})]$$

244 Where  $v_i$  was the average optical density of the  $i$ th incubation time.

#### 245 2.5 SOM decomposition rate

246 Four replicates from each sampling site with a 60% water-holding capacity were incubated at 20°C.  
247 In brief, 40 g of each fresh soil sample were put into a 150-ml incubation bottle, and the samples

248 were then adjusted so that their moisture content corresponded to a water-holding capacity of 60%.  
249 During the 4-week incubation period, the soil respiration rates were measured on days 1, 7, 14, 21,  
250 and 28 using an automatic system. The SOM decomposition rates were calculated as described in the  
251 study of Xu et al. (2015).

## 252 2.6 Statistical analysis

253 One-way analysis of variance (ANOVA) followed by a post hoc Tukey HSD test were used to test  
254 the significance of the differences among the soil properties, C use, functional diversity, and SOM  
255 decomposition rates in the different forest ecosystems. We tested the relationships between labile C,  
256 soil microbial community structure, microbial function, and the SOM decomposition rates with the  
257 Pearson correlation test. Differences were considered significant when  $P < 0.05$ , with the marginal  
258 significance set at  $P < 0.01$ . All ANOVA and regression analyses were performed using SPSS 19.0  
259 for Windows. Data are reported as the mean  $\pm$  SE.

260 We used redundancy analysis (RDA) to examine the relationship between the environmental  
261 variables and soil microbial substrate use. The environmental variables were the same as those  
262 described in Xu et al. (2018), including climate, soil properties, litter properties, and plant functional  
263 traits. Before RDA, we conducted forward selection of the environmental variables that were  
264 significantly correlated with variations in the microbial substrate use profile using stepwise  
265 regression and the Monte Carlo Permutation Test. We used CANOCO software 4.5 (Ter Braak and  
266 Smilauer 2002) for the RDA and stepwise regression. The environmental properties, which were  
267 significantly correlated with the microbial substrate use in the RDA, were stressed in the plots.

## 268 **3 Results**

### 269 3.1 Patterns in the microbial substrate use, soil labile carbon, and SOM decomposition rates

270 Of the forests along the NSTEC, the C metabolic intensity of soil microbes was lowest in HZ and LS;  
271 the C metabolic intensity of soil microbes differed significantly between JF and the other forests (Fig.  
272 2), which indicates that the color development was significantly higher in the tropical forest soils  
273 than in the subtropical and temperate forest soils and is consistent with the variations in the AWCD

274 (Fig. S1). The average values of  $R$ ,  $H'$ , and  $D$  were significantly different among the nine forest soils  
275 and were highest in JF, SN, and CB (Table 3).

276 Across the nine forests, soil microorganisms used the six substrate groups in the same order; the  
277 carboxylic acid substrate was used most, followed by amino acids, carbohydrates, polymers, amines,  
278 and miscellaneous substrates (Fig. 3). Microorganisms in the boreal and temperate forests mainly  
279 metabolized carbohydrates, amino acids, and carboxylic acids, while those from the subtropical and  
280 tropical forests used the substrates in equal proportions. **The substrate microbial use ability was  
281 highest in the coniferous broad-leaved mixed forest and tropical forest soils, and lowest in the  
282 coniferous forest soil (Fig. 3).**

283 Overall, soil MBC concentrations in the boreal and temperate forests were three to eight times  
284 higher than those of the subtropical and tropical forests. In contrast, the average DOC concentrations  
285 in the tropical and subtropical forest soils, which ranged from 311 to 458 mg kg<sup>-1</sup>, were significantly  
286 higher than the average concentrations in the temperate and boreal forest soils, where the average  
287 concentrations ranged from 204 to 284 mg kg<sup>-1</sup> (Table 2). The average SOM decomposition rates in  
288 the subtropical forests ranged from 0.64 to 2.42 μg C g<sup>-1</sup> d<sup>-1</sup>, and were significantly lower than the  
289 rates in the temperate forests, which ranged from 3.43 to 4.61 μg C g<sup>-1</sup> d<sup>-1</sup> (Table S3).

### 290 3.2 Effect of environmental properties on soil microbial substrate use

291 Redundancy analysis showed that the variations in soil microbial substrate use were strongly and  
292 positively correlated with the CWM values of LDMC, leaf N, and leaf C, and strongly and negatively  
293 correlated with the soil silt content and SMC (Fig. 4). The RDA2 of soil microbial substrate use was  
294 strongly positively correlated with TN and SOC, but negatively correlated with the mean annual  
295 precipitation (MAP) (Fig. 5). RDA1 mainly represented the plant functional traits, soil texture, and  
296 micro-meteorological conditions, while RDA2 represented climate and soil nutrients. Overall, the  
297 soil silt content and the CWM values of plant functional traits were the main predictors of the  
298 latitudinal variation in the soil microbial substrate use along the NSTEC.

### 299 3.3 Relationships between soil microbial substrate use, enzyme activities, and PLFAs

300 Microbial carbohydrate use was positively related with bacterial biomass and actinomycic biomass

301 (Fig. 5). Microbial polymer use was negatively related with bacterial biomass and actinomycic  
302 biomass. Microbial amines use was negatively related with G<sup>-</sup> bacterial and fungal biomass.  
303 Miscellaneous substrate use was positively related with fungal biomass and G<sup>+</sup>/G<sup>-</sup> bacterial biomass  
304 (Fig. 5).

305 The abundance of G<sup>-</sup> bacteria was positively associated first with the specific activities of BG,  
306 whereas actinomycetes and G<sup>+</sup> bacteria were positively associated with BG and LAP. Soil fungi were  
307 negatively associated with BG (Fig. 5).

308 3.4 Relationships between SOM decomposition rate, PLFAs, enzyme activity, and microbial  
309 metabolic activities

310 The SOM decomposition rates were significantly and positively related to soil MBC concentrations  
311 but significantly and negatively related to soil DOC concentrations (Fig. 6a and b). Except for amino  
312 acid and amine substrates, the SOM decomposition rates were significantly and positively related to  
313 microbial metabolic activities (AWCD) and carbohydrate substrate use (Fig. 6c and d) and negatively  
314 related to carboxylic acid, polymer, and miscellaneous substrate use (Fig. 6e, g, and i).

315 The SOM decomposition rates were significantly and positively correlated with total PLFAs  
316 ( $r=0.456$ ,  $P=0.005$ ), bacteria ( $r=0.3836$ ,  $P=0.021$ ), actinomycetes ( $r=0.500$ ,  $P=0.002$ ), and G<sup>-</sup>  
317 bacteria PLFAs ( $r=0.520$ ,  $P=0.001$ ) (Fig. 7a, b, d, and f) but were negatively correlated with fungal  
318 PLFAs ( $r=-0.370$ ,  $P=0.026$ ), F/B ( $r=-0.513$ ,  $P=0.001$ ), and the G<sup>+</sup>/G<sup>-</sup> ( $r=-0.496$ ,  $P=0.002$ ) (Fig. 7c,  
319 g, and h). Except for LAP activity, soil enzyme activities were significantly and positively correlated  
320 with the SOM decomposition rates ( $P<0.01$ ) (Fig. 7i, j, and l).

## 321 **4 Discussion**

322 4.1 Response of soil labile C and SOM decomposition rates to variations in forest type

323 Soil organic matter is one of the most important C pools in terrestrial ecosystems. The concentrations  
324 of soil DOC in the temperate forests were lower than those in subtropical forests but the soil MBC  
325 concentrations were higher in temperate forests than in subtropical forests. This reflects the results  
326 of previous regional and global studies (Tian et al., 2010; Xu et al., 2013), and shows that the

327 production/consumption ratio of soil DOC was lower, but that microbial C immobilization was higher,  
328 in the high latitude forests than closer to the tropics (Fang et al., 2014). Soil DOC, as a labile SOM  
329 fraction with a rapid turnover, is one of the primary energy sources for microorganisms. The higher  
330 temperatures and precipitation in subtropical and tropical forests lead to higher turnover rates (Fang  
331 et al., 2014), so soil DOC concentrations were highest in subtropical, and MBC concentrations were  
332 lowest, in tropical forests. However, in temperate forests, more C is assimilated into microbial  
333 biomass, so that less C is lost through chemical and physical processes (Liu et al., 2010). Also,  
334 because the decomposition ability of different microbe groups varies, the differences in the soil  
335 microbial communities in different forest ecosystems may also be responsible for the spatial  
336 variations in the soil DOC and MBC concentrations along the NSTEC (Hagedorn et al., 2008).

337 Heterotrophic soil respiration is sustained by the decomposition of SOM. The SOM  
338 decomposition rates along the NSTEC were greater in temperate forests than in subtropical forests,  
339 which was consistent with the variations in the soil MBC and SOC concentrations. These results  
340 indicate that, as found in other studies, large scale SOM decomposition rates are driven by the  
341 amounts of substrate available (Yu et al., 2010). Changes in the availability of C in SOM may affect  
342 the microbial resource strategies, which may in turn influence the SOM decomposition rate.

#### 343 4.2 Mechanisms driving latitudinal variations in microbial substrate use

344 The AWCD reflects the sole C source use ability of the soil microbial community (Garland and Mills,  
345 1991). Of the six groups of C substrates, microbial communities in the temperate forests mainly used  
346 carbohydrates, carboxylic acids, and amino acids, which suggests that microorganisms in temperate  
347 forests probably use high-energy substrates that degrade easily (Kunito et al., 2009). **The carbon  
348 substrate use was lowest in the coniferous forest. This shows that, compared with coniferous species,  
349 broadleaved tree species produce root exudates and litter high in water-soluble sugars, organic acids,  
350 and amino acids that are more favorable for microbial activity (Priha et al. 2001). There was no  
351 significant latitudinal pattern in the C metabolic intensity of soil microbes in our study, which was  
352 inconsistent with hypothesis (1). Our results show that MAP only had a moderate effect on the soil  
353 microbial function (Fig. 4). However, there was significant spatial variation in the use of different  
354 carbon sources, which was also related, to a lesser extent, to climate. Consistent with hypothesis (2),**

355 soil microbial functions were similar in closely related tree species and diverged as the variability  
356 between tree species and forest types increased (Fig. 4), which suggests that plant traits have more  
357 influence on soil microbial functions than climate.

358 A growing number of studies reported that vegetation type, land use, soil nutrients, and soil  
359 organic matter quality and quantity can determine large scale patterns of microbial communities (de  
360 Vries et al., 2012; Tu et al., 2016). Plant functional traits that are related to growth may determine a  
361 tree species' ability to contribute to the soil carbon pool via leaf litter inputs. For example, it was  
362 previously reported that plant traits such as the leaf N content, SLA, and LDMC could explain  
363 variations in soil nutrients and litter decomposition rates (Eichenberg et al., 2014; Laughlin, 2011).  
364 Therefore, we examined how these plant traits influenced the soil microbial function by latitude. We  
365 found that changes in the soil microbial C substrate use with latitude were mainly related to the soil  
366 silt contents and the CWMs of LDMC, and leaf C and leaf N concentrations, which indicates that the  
367 quality of nutrients from plants had a major influence on microbial carbon use efficiency (Hypothesis  
368 (3)). Plant species with high a SLA, high leaf N concentrations, and low LDMC can produce  
369 bacterial-dominated soil microbial communities in grasslands (Orwin et al., 2010). Looking beyond  
370 individual traits, related tree species may cultivate microbial communities with similar preferences  
371 for carbon sources through coevolution of plants and microbes (Liu et al., 2012b; Buscot, 2015).

372 As hypothesized, the soil microbial community composition was explained by the CWMs of  
373 plant traits at the regional scale. Carbon substrate use was negatively correlated with the CWM of  
374 leaf N concentrations (Table S2, Fig. S2). Bacterially dominated soil microbial communities develop  
375 from leaf litter comprised of N-rich leaves from fast growing species (De Vries et al., 2012), while  
376 leaves with low N concentrations will promote fungal domination (Orwin et al., 2010; De Vries et  
377 al., 2012). In line with this, fungal biomass decreased, and bacterial biomass increased, as the CWM  
378 leaf N content increased, and is associated with fast-growing, N-exploitative plants (Xu et al., 2018).  
379 Leaf N concentrations are considered as indicators of plant growth and resource uptake (Wright et  
380 al., 2004). The results from this study show that, along the NSTEC, high leaf N restrained microbial  
381 C substrate use (Fig.S2) and was a good indicator of the competition between plants for soil N (Pei  
382 et al., 2016). Soil microbes and nearby plants may have been competing for N in the soil.

383 We also found that the C substrate use was negatively correlated with the CWM of leaf C

384 concentrations (Table S2, Fig. S2). Plants at high latitudes may have higher leaf C concentrations  
385 than plants at lower latitudes so that they can balance the osmotic pressure of cells and resist freezing  
386 (Millard et al., 2007; Hoch and Körner, 2012). The increased C was most likely in the form of an  
387 increase in non-structural C, including starch, low molecular weight sugars, and storage lipids that  
388 are easy to break down. Therefore, soil microorganisms from the temperate forests mainly  
389 metabolized high-energy substrates, such as carbohydrates, carboxylic acids, and amino acids.

390 The LDMC is the ratio of the leaf dry weight to the fresh weight and has been used as a proxy  
391 for the ratio of structural compounds to assimilatory tissue (mesophyll and epidermis, Van Arendonk  
392 and Poorter, 1994). High values of LDMC indicate large amounts of vascular tissue, cellulose,  
393 insoluble sugars, and leaf lignin that are difficult to decompose (Poorter and Bergkotte, 1992); C  
394 substrates such as carbohydrates, carboxylic acid, and amino acid are, however, easy to decompose  
395 (Myers et al., 2001). In line with this, the use of carbohydrate, carboxylic acid, and amino acid  
396 substrates was negatively related to the CWMs of the LDMC (Table S2). Pei et al. (2016) reported  
397 that the LDMC was an important driver of multivariate soil microbial community structure and  $G^-$   
398 bacterial abundance.

399 Soil texture regulates soil biological processes and so affects the soil microbial community  
400 structure (Sessitsch et al., 2001). In the present study, microbial C substrate use was significantly and  
401 positively related to the soil silt content. Soil types and textures varied along the NSTEC. Soil texture  
402 influences how microbes use organic matter, and has a strong influence on soil moisture, nutrient  
403 availability, and retention (Veen and Kuikman, 1990). Fine-textured soils with a higher silt content  
404 are known to be more favorable for bacterial growth than soils with a lower silt content because of  
405 their greater water-holding capacity and nutrient availability, and because they are better protected  
406 from bacterial grazers (Carson et al., 2010). We found that the microbial C substrate use was higher  
407 in LS, CB, SN, and JL than in the other forests, reflecting their fine-grained soils and high silt contents,  
408 which ranged from 60% to 80%.

#### 409 4.3 Links between soil microbial community structure and function

410 The soil microbial community structure and functions were significantly correlated along the NSTEC.  
411 Soil carbohydrate and polymer substrate use were mainly related to soil  $G^+$  bacterial and actinomycic

412 biomass, but amines and miscellaneous substrates were mainly related to soil G<sup>-</sup> bacterial, fungal  
413 biomass, and the F/B ratio. Soil bacteria mainly decomposed simple carbohydrates, organic acids,  
414 and amino acids, whereas soil fungi mainly decomposed recalcitrant compounds (Myers et al., 2001;  
415 Treonis et al., 2004). Consistent with this, soil bacterial PLFAs were positively correlated with the  
416 carbohydrate substrate use and the fungal PLFAs were positively related with miscellaneous substrate  
417 use. The results are similar to those reported by Sterner and Elser (2002), who found that fungi tended  
418 to have higher C/N or C/P ratios while heterotrophic bacteria typically have lower C/N or C/P ratios.

419 Shifts in microbial community composition may influence enzyme production (DeForest et al.,  
420 2012; Waldrop et al., 2000; Brockett et al., 2012). Different microbial groups require different  
421 amounts of nutrients to construct biomass, or have enzymes that differ in their affinity for nutrients.  
422 We found that the relative abundances of the G<sup>+</sup> bacteria and actinomycetes communities were  
423 associated with the specific activities of BG, AP, and LAP), whereas the relative abundance of the  
424 G<sup>-</sup> bacteria was correlated with soil NAG activities involved in chitin degradation. In agreement with  
425 our study, numerous other researchers have reported significant correlations between PLFA profiles  
426 and enzyme activities (Waldrop et al., 2000; DeForest et al., 2012; Brockett et al., 2012; Riah-Anglet  
427 et al., 2015). Soil BG was mainly responsible for cellulose degradation and was involved in breaking  
428 down complex organic compounds (cellobiose) into small molecule substrates (glucose) in favor of  
429 acquiring C through microbial community growth (Waldrop et al., 2000). Soil NAG activities were  
430 weakly and positively related with fungal biomass in the present study, and may have been mainly  
431 produced by fungal populations (Valášková et al., 2007). Fungi are commonly considered as  
432 producers of oxidative enzymes. Therefore, the influence of fungal biomass on variations in enzyme  
433 activities was minimal (Kivlin and Treseder, 2014). The linkages between enzyme activity and  
434 community composition may provide some insight into the microbial mechanisms that drive the  
435 decomposition of macromolecular C compounds. These results suggest that that overall ecosystem  
436 functioning may suffer if soil microbial groups are lost.

437 The quality and amounts of SOM are influenced by the biomass, vegetation coverage, root  
438 distribution, and microbial species (Raich and Schlesinger, 1992). The SOM decomposition rates  
439 were higher in temperate forests than in tropical forests and may reflect the higher soil microbial  
440 biomass (Wang et al., 2016). In line with this, SOM decomposition rates were positively related with



441 soil MBC concentrations and different groups of PLFAs. The inverse relationships between SOM  
442 decomposition rates and DOC, carboxylic acids, polymers, and miscellaneous along the NSTEC,  
443 indicate a shift in the soil C turnover from open to closed with increases in the soil labile C  
444 concentrations (Fang et al., 2014). Soil DOC and MBC influence SOM decomposition rates indirectly  
445 by regulating microbial properties (Boberg et al., 2014; Wei et al., 2014). In our study, SOM  
446 decomposition rates were positively related with bacterial PLFAs but negatively with fungal PLFAs.  
447 Because different communities of microbes have different SOM use efficiencies (Balsler and Wixon,  
448 2009; Lipson et al., 2009; Monson et al., 2006), changes in the microbial community structure may  
449 influence the microbial activities and the decomposition rates of organic matter (Lipson et al., 2009;  
450 Keiblinger et al., 2010). **The functional dissimilarity of microbes and fungi may help explain these**  
451 **results. However, we did not measure some key variables, such as the microbial competition and**  
452 **interactions, and relationship between the microbial diversity and the decomposition rates. Therefore,**  
453 **in the future, we will use different experimental techniques that will help us gain an improved**  
454 **understanding of the mechanisms that drive the relationships between the structure and function of**  
455 **microbial communities.**

## 456 **5 Conclusions**

457 In this study, we examined the patterns in labile C concentrations, SOM decomposition rates,  
458 microbial substrate use, and functional diversity and identified a combination of abiotic and biotic  
459 factors that influenced soil microbial functional diversity at the regional scale. The MBC  
460 concentration and SOM decomposition rates were significantly lower, and the soil DOC  
461 concentrations and microbial metabolic activities were higher, in the subtropical and tropical forests  
462 than in the temperate forests. For the first time, we showed that, along with the soil silt content, CWM  
463 plant traits explained variations in soil microbial C substrate use at the regional scale. Soil microbial  
464 community structure and function were strongly related, which suggests that the loss of soil microbial  
465 groups may have consequences for overall ecosystem functioning.

466 *Data accessibility.* Requests for data and materials should be addressed to N.H. (henp@igsnr.ac.cn) and G.Y.  
467 ([yugr@igsnr.ac.cn](mailto:yugr@igsnr.ac.cn)).

468

469 *Author contributions.* Z.W.X., G.R.Y. and X.Y.Z. planned and designed the research. Z.W.X., N.P.H., R.L.W., and  
470 N.Z. conducted fieldwork. Z.W.X., G.R.Y., X.Y.Z., and Q.F.W wrote the manuscript. All authors contributed  
471 critically to the drafts and gave final approval for publication.

472 *Competing interests.* The authors declare that they have no conflict of interest.

473

## 474 **Acknowledgements**

475 This research was jointly supported by the National Natural Science Foundation of China (41601084, 41571251), the  
476 Fundamental Research Funds for the Central Universities (2412019FZ001), Science and Technology Research Project  
477 of Jilin Province (JJKH20190283KJ), the National Key R&D Program of China (2016YFA0602301), and the China  
478 Postdoctoral Science Foundation (2018M631850).

## 479 **References**

- 480 van Arendonk, J.J.C.M., Poorter, H. The chemical composition and anatomical structure of leaves of grass species  
481 differing in relative growth rate, *Plant Cell Environ.*, 17, 963-970, 1994.
- 482 Bååth, E., Anderson, T.H. Comparison of soil fungal/bacterial ratios in a pH gradient using physiological and PLFA-  
483 based techniques, *Soil Biol. Biochem.*, 35, 955-963, 2003.
- 484 Balser, T.C., Firestone, M.K. Linking microbial community composition and soil processes in a California annual  
485 grassland and mixed-conifer forest, *Biogeochemistry*, 73, 395-415, 2005.
- 486 Balser, T.C., Wixon, D.L. Investigating biological control over soil carbon temperature sensitivity, *Global Change*  
487 *Biol.*, 15, 2935-2949, 2009.
- 488 Banerjee, S., Kirkby, C.A., Schmutter, D., Bissett, A., Kirkegaard, J.A., Richardson, A.E. Network analysis reveals  
489 functional redundancy and keystone taxa amongst bacterial and fungal communities during organic matter  
490 decomposition in an arable soil, *Soil Biol. Biochem.*, 97, 188-198, 2016.
- 491 Boberg, J.B., Finlay, R.D., Stenlid, J., Ekblad, A., Lindahl, B.D. Nitrogen and carbon reallocation in fungal mycelia  
492 during decomposition of boreal forest litter, *PLOS ONE*, 9, e92897, 2014.
- 493 Brockett, B.F.T., Prescott, C.E., Grayston, S.J. Soil moisture is the major factor influencing microbial community  
494 structure and enzyme activities across seven biogeoclimatic zones in western Canada, *Soil Biol. Biochem.*, 44,  
495 9-20, 2012.
- 496 Buscot, F. Implication of evolution and diversity in arbuscular and ectomycorrhizal symbioses, *J. Plant Physiol.*, 172,  
497 55-61, 2015.
- 498 Cao, H., Chen, R., Wang, L., Jiang, L., Yang, F., Zheng, S., Wang, G., Lin, X. Soil pH, total phosphorus, climate and  
499 distance are the major factors influencing microbial activity at a regional spatial scale, *Sci. Rep-UK*, 6, 25815,  
500 2016.
- 501 Carson, J.K., Gonzalez-Quinones, V., Murphy, D.V., Hinz, C., Shaw, J.A., Gleeson, D.B. Low pore connectivity  
502 increases bacterial diversity in soil, *Appl. Environ. Microb.*, 76, 3936-3942, 2010.
- 503 Coulis, M., Fromin, N., David, J.-F., Gavinet, J., Clet, A., Devidal, S., Roy, J., Hättenschwiler, S. Functional  
504 dissimilarity across trophic levels as a driver of soil processes in a Mediterranean decomposer system exposed  
505 to two moisture levels, *Oikos*, 124, 1304-1316, 2015..
- 506 De Vries, F.T., Manning, P., Tallowin, J.R., Mortimer, S.R., Pilgrim, E.S., Harrison, K.A., Hobbs, P.J., Quirk, H.,  
507 Shipley, B., Cornelissen, J.H., Kattge, J., Bardgett, R.D. Abiotic drivers and plant traits explain landscape-scale  
508 patterns in soil microbial communities, *Ecol. Lett.*, 15, 1230-1239, 2012.
- 509 Deforest, J., Smemo, K., Burke, D., Elliott, H., Becker, J. Soil microbial responses to elevated phosphorus and pH in  
510 acidic temperate deciduous forests, *Biogeochemistry*, 109, 189-202, 2012.
- 511 **Eichenberg, D., Trogisch, S., Huang, Y., He, J.S., Bruelheide, H. Shifts in community leaf functional traits are related**  
512 **to litter decomposition along a secondary forest succession series in subtropical China. *Journal of Plant Ecology*,**  
513 **2014. <http://dx.doi.org/10.1093/jpe/rtu021>.**
- 514 Fang, H., Cheng, S., Wang, Y., Yu, G., Xu, M., Dang, X., Li, L., Wang, L. Changes in soil heterotrophic respiration,  
515 carbon availability, and microbial function in seven forests along a climate gradient, *Ecol. Res.*, 29, 1077-1086,  
516 2014.
- 517 Fiore, N., Bradford, M. A. Toward an ecological classification of soil bacteria, *Ecology*, 88, 1354-1364, 2007.
- 518 Garland, J.L., Mills, A.L. Classification and characterization of heterotrophic microbial communities on the basis of  
519 patterns of community-level sole carbon source utilization, *Appl. Environ. Microb.*, 57, 2351-2359, 1991.
- 520 Garnier, E., Cortez, J., Billes, G., Navas, M.L., Roumet, C., Debussche, M., Gérard, L., Alain, B., David, A., Astrid,  
521 B., Cathy, N., Jean-Patrick, T. Plant functional markers capture ecosystem properties during secondary

522 succession, *Ecology*, 85, 2630-2637, 2004.

523 Gartzia-Bengoetxea, N., Kandeler, E., Martínez de Arano, I., Arias-González, A. Soil microbial functional activity is  
524 governed by a combination of tree species composition and soil properties in temperate forests, *Appl. Soil Ecol.*,  
525 100, 57-64, 2016.

526 Gomez, E., Ferreras, L., Toresani, S. Soil bacterial functional diversity as influenced by organic amendment  
527 application, *Bioresour. Technol.*, 97, 1484-1489, 2006.

528 Guckert, J.B., Carr, G.J., Johnson, T.D., et al. Community analysis by Biolog: curve integration for statistical analysis  
529 of activated sludge microbial habitats, *J. Microbiol. Meth.*, 27, 183-197, 1996.

530 Huang, Z., Clinton, P.W., Baisden, W.T., Davis, M.R. Long-term nitrogen additions increased surface soil carbon  
531 concentration in a forest plantation despite elevated decomposition, *Soil Biol. Biochem.*, 43, 302-307, 2011.

532 Jagadamma, S., Mayes, M.A., Steinweg, J.M., Schaeffer, S.M. Substrate quality alters the microbial mineralization  
533 of added substrate and soil organic carbon, *Biogeosciences*, 11, 4665-4678, 2014.

534 Jones, D., Willett, V. Experimental evaluation of methods to quantify dissolved organic nitrogen (DON) and dissolved  
535 organic carbon (DOC) in soil, *Soil Biol. Biochem.*, 38, 991-999, 2006.

536 Keiblinger, K.M., Hall, E.K., Wanek, W., Szukics, U., Hammerle, I., Ellersdorfer, G., Bock, S., Strauss, J., Sterflinger,  
537 K., Richter, A., Zechmeister-Boltenstern, S. The effect of resource quantity and resource stoichiometry on  
538 microbial carbon-use-efficiency, *FEMS Microb. Ecol.* 73, 430-440, 2010.

539 Kivlin, S.N. & Treseder, K.K. Soil extracellular enzyme activities correspond with abiotic factors more than fungal  
540 community composition, *Biogeochemistry*, 117, 23-37, 2014.

541 Klimek, B., Chodak, M., Jaźwa, M., Niklińska, M. Functional diversity of soil microbial communities in boreal and  
542 temperate Scots pine forests, *Eur. J. Forest Res.*, 135, 731-742, 2016.

543 Kunito, T., Akagi, Y., Park, H.-D., Toda, H. Influences of nitrogen and phosphorus addition on polyphenol oxidase  
544 activity in a forested Andisol, *Eur. J. Forest Res.*, 128, 361-366, 2009.

545 **Laughlin, D.C. Nitrification is linked to dominant leaf traits rather than functional diversity. *Journal of Ecology* 99,**  
546 **1091-1099, 2011.**

547 Lipson, D.A., Monson, R.K., Schmidt, S.K., Weintraub, M.N. The trade-off between growth rate and yield in  
548 microbial communities and the consequences for under-snow soil respiration in a high elevation coniferous forest,  
549 *Biogeochemistry*, 95, 23-35, 2009.

550 Liu, L., Gundersen, P., Zhang, T., and Mo, J. M.: Effects of phosphorus addition on soil microbial biomass and  
551 community composition in three forest types in tropical China, *Soil Biol. Biochem.*, 44, 31-38, 2012a.

552 Liu, X., Liang, M., Etienne, R.S., Wang, Y., Staehelin, C., Yu, S. Experimental evidence for a phylogenetic Janzen-  
553 Connell effect in a subtropical forest, *Ecol. Lett.*, 15, 111-118, 2012b.

554 Liu, Z., Liu, G., Fu, B., Wu, Y., Hu, H., Fu, S. Changes in the soil microbial community with a pine plantation  
555 restoration in a dry valley of the upper reaches of the Minjiang River, southwest China, *Ann N Y Acad. Sci.*,  
556 1195 Suppl 1, E82-95, 2010.

557 **Menyailo, O.V., Hungate, B.A., Zech, W. Tree species mediated soil chemical changes in a Siberian artificial**  
558 **Afforestation experiment. *Plant Soil*, 242, 171-182, 2002.**

559 Millard, P., Sommerkorn, M., Grelet, G.A. Environmental change and carbon limitation in trees: a biochemical,  
560 ecophysiological and ecosystem appraisal, *New Phytol.*, 175, 11-28, 2007.

561 Monson, R.K., Lipson, D.L., Burns, S.P., Turnipseed, A.A., Delany, A.C., Williams, M.W., Schmidt, S.K. Winter  
562 forest soil respiration controlled by climate and microbial community composition, *Nature*, 439, 711-714, 2006.

563 Myers, R.T., Zak, D.R., White, D.C., Peacock, A. Landscape-level patterns of microbial community composition and  
564 substrate use in upland forest ecosystems, *Soil Sci. Soc. Am. J.*, 65, 359-367, 2001.

565 Orwin, K.H., Buckland, S.M., Johnson, D., Turner, B.L., Smart, S., Oakley, S., Bardgett, R.D. Linkages of plant traits  
566 to soil properties and the functioning of temperate grassland, *J. Ecol.*, 98, 1074-1083, 2010.

567 Pei, Z., Eichenberg, D., Bruelheide, H., Kröber, W., Kühn, P., Li, Y., von Oheimb, G., Purschke, O., Scholten, T.,  
568 Buscot, F., Gutknecht, J.L.M. Soil and tree species traits both shape soil microbial communities during early  
569 growth of Chinese subtropical forests, *Soil Biol. Biochem.*, 96, 180-190, 2016.

570 Peng, X., Wang, W. Stoichiometry of soil extracellular enzyme activity along a climatic transect in temperate  
571 grasslands of northern China, *Soil Biol. Biochem.*, 98, 74-84, 2016.

572 Philippot, L., Spor, A., Henault, C., Bru, D., Bizouard, F., Jones, C.M., Sarr, A., Maron, P.A. Loss in microbial  
573 diversity affects nitrogen cycling in soil, *ISME J.*, 7, 1609-1619, 2013.

574 Poorter, H., Bergkotte, M. Chemical composition of 24 wild species differing in relative growth rate, *Plant Cell*  
575 *Environ.*, 15, 221-229, 1992.

576 Preston-Mafham, J., Boddy, L., Randerson, P.F. Analysis of microbial community functional diversity using sole-  
577 carbon-source utilisation profiles-a critique, *FEMS Microb. Ecol.*, 42, 1-14, 2002.

578 **Priha, O., Grayston, S.J., Hiukka, R., Pennanen, T., Smolander, A. Microbial community structure and characteristics**  
579 **of the organic matter in soils under *Pinus sylvestris*, *Picea abies* and *Betula pendula* at two forest sites. *Biol***  
580 ***Fertil Soils*, 33, 17-24, 2001.**

581 Raich, J.W., Clark, D.A., Schwendenmann, L., Wood, T.E. Aboveground tree growth varies with belowground carbon  
582 allocation in a tropical rainforest environment, *PloS one*, 9, e100275, 2014.

583 Riah-Anglet, W., Trinsoutrot-Gattin, I., Martin-Laurent, F., Laroche-Ajzenberg, E., Norini, M.-P., Latour, X., Laval,  
584 K. Soil microbial community structure and function relationships: A heat stress experiment, *Appl. Soil Ecol.*, 86,  
585 121-130, 2015..

586 Russell, A.E., Raich, J.W., Valverde-Barrantes, O.J., Fisher, R.F. Tree species effects on soil properties in experimental  
587 plantations in tropical moist forest, *Soil Sci. Soc. Am. J.*, 71, 1389, 2007.

588 Saiya-Cork, K.R., Sinsabaugh, R.L., Zakb, D.R. The effects of long term nitrogen deposition on extracellular enzyme

589 activity in an *Acer saccharum* forest soil, *Soil Biol. Biochem.*, 34, 1309-1315, 2002.

590 Sessitsch, A., Weilharter, A., Gerzabek, M.H., Kirchmann, H., Kandeler, E. Microbial Population Structures in Soil

591 Particle Size Fractions of a Long-Term Fertilizer Field Experiment, *Appl. Environ. Microb.*, 67, 4215-4224, 2001.

592 Sherman, C., Steinberger, Y. Microbial functional diversity associated with plant litter decomposition along a climatic

593 gradient, *Microb. Ecol.*, 64, 399-415, 2012.

594 Six, J., Elliott, E. T., Paustian, K. Soil structure and soil organic matter: II. A normalized stability index and the effect

595 of mineralogy, *Soil Sci. Soc. Am. J.*, 64, 1042-1049, 2000.

596 Sterner, R. W. & Elser, J. J. Ecological stoichiometry: the biology of elements from molecules to the biosphere.

597 Princeton, New Jersey, USA: Princeton University Press, 2002.

598 Strickland, M.S., Lauber, C., Fierer, N., Bradford, M.A. Testing the functional significance of microbial community

599 composition, *Ecology*, 90, 441-451, 2009.

600 Soil Survey Staff Keys to Soil Taxonomy, 11th ed. USDA-Natural Resources Conservation Service, Washington, DC,

601 2010.

602 Swallow, M.J.B., Quideau, S.A. A method for determining community level physiological profiles of organic soil

603 horizons, *Soil Sci. Soc. Am. J.*, 79, 536-542, 2015.

604 Talbot, J.M., Bruns, T.D., Taylor, J.W., Smith, D.P., Branco, S., Glassman, S.I., Erlandson, S., Vilgalys, R., Liao, H.L.,

605 Smith, M.E., Peay, K.G. Endemism and functional convergence across the North American soil mycobiome, *P.*

606 *Natl. Acad. Sci. USA.*, 111, 6341-6346, 2014.

607 Ter Braak, C.J.F., Smilauer, P. CANOCO Reference manual and CanoDraw for Windows User's guide: Software for

608 Canonical Community Ordination (Version 4.5). Microcomputer, 2002.

609 Tian, H., Chen, G., Zhang, C., Melillo, J.M., Hall, C.A.S., Pattern and variation of C:N:P ratios in China's soils: a

610 synthesis of observational data, *Biogeochemistry*, 98, 139-151 2010.

611 Tian, J., McCormack, L., Wang, J., Guo, D., Wang, Q., Zhang, X., Yu, G., Blagodatskaya, E., Kuzyakov, Y. Linkages

612 between the soil organic matter fractions and the microbial metabolic functional diversity within a broad-leaved

613 Korean pine forest, *Eur. J. Soil Biol.*, 66, 57-64, 2015.

614 Treonis, A.M., Ostle, N.J., Stott, A.W., Primrose, R., Grayston, S.J., Ineson, P. Identification of groups of

615 metabolically-active rhizosphere microorganisms by stable isotope probing of PLFAs, *Soil Biol. Biochem.*, 36,

616 533-537, 2004.

617 Tu, Q., Deng, Y., Yan, Q., Shen, L., Lin, L., He, Z., Wu, L., Van Nostrand, J.D., Buzzard, V., Michaletz, S.T., Enquist,

618 B.J., Weiser, M.D., Kaspari, M., Waide, R.B., Brown, J.H., Zhou, J. Biogeographic patterns of soil diazotrophic

619 communities across six forests in the North America, *Mol. Ecol.*, 25, 2937-2948, 2016.

620 Valášková, V., Šnajdr, J., Bittner, B., Cajthaml, T., Merhautová, V., Hofrichter, M., Baldrian, P. Production of

621 lignocellulose-degrading enzymes and degradation of leaf litter by saprotrophic basidiomycetes isolated from a

622 *Quercus petraea* forest, *Soil Biol. Biochem.*, 39, 2651-2660, 2007.

623 Vance, E.D., Brookes, P.C., Jenkinson, D.S. An extraction method for measuring soil microbial biomass C, *Soil Biol.*

624 *Biochem.*, 19, 703-707, 1987.

625 Veen, J.A.V., Kuikman, P.J. Soil structural aspects of decomposition of organic-matter by micro-organism,

626 *Biogeochemistry*, 11, 213-233, 1990.

627 Waldrop, M.P., Firestone, M.K. Response of microbial community composition and function to soil climate change,

628 *Microb. Ecol.*, 52, 716-724, 2006.

629 Waldrop, M. P., Baiser, T. C. & Firestone, M. K. Linking microbial community composition to function in a tropical

630 soil, *Soil Biol. Biochem.*, 32, 1837-1846, 2000.

631 Wang, Q., He, N., Yu, G., Gao, Y., Wen, X., Wang, R., Koerner, S.E., Yu, Q. Soil microbial respiration rate and

632 temperature sensitivity along a north-south forest transect in eastern China: Patterns and influencing factors, *J.*

633 *Geophys. Res.(Biogeosciences)*, 121, 399-410, 2016.

634 Waring, B.G., Alvarez-Cansino, L., Barry, K.E., Becklund, K.K., Dale, S., Gei, M.G., Keller, A.B., Lopez, O.R.,

635 Markesteijn, L., Mangan, S., Riggs, C.E., Rodriguez-Ronderos, M.E., Segnitz, R.M., Schnitzer, S.A., Powers,

636 J.S. Pervasive and strong effects of plants on soil chemistry: a meta-analysis of individual plant 'Zinke' effects,

637 *Proc. R. Soc. B. The Royal Society*, 282, 20151001, 2015.

638 Wei, H., Guenet, B., Vicca, S., Nunan, N., AbdElgawad, H., Pouteau, V., Shen, W., Janssens, I.A. Thermal acclimation

639 of organic matter decomposition in an artificial forest soil is related to shifts in microbial community structure,

640 *Soil Biol. Biochem.*, 71, 1-12, 2014.

641 Wright, I.J., Reich, P.B., Westoby, M., Ackerly, D.D., Baruch, Z., Bongers, F., et al. The worldwide leaf economics

642 spectrum, *Nature*, 428, 821-827, 2004.

643 Xu, X., Thornton, P.E., Post, W.M. A global analysis of soil microbial biomass carbon, nitrogen and phosphorus in

644 terrestrial ecosystems, *Global Ecol. Biogeogr.*, 22, 737-749, 2013.

645 Xu, Z., Yu, G., Zhang, X., Ge, J., He, N., Wang, Q., Wang, D. The variations in soil microbial communities, enzyme

646 activities and their relationships with soil organic matter decomposition along the northern slope of Changbai

647 Mountain, *Appl. Soil Ecol.*, 86, 19-29, 2015.

648 Xu, Z., Yu, G., Zhang, X., He, N., Wang, Q., Wang, S., Wang, R., Zhao, N., Jia, Y., Wang, C. Soil enzyme activity and

649 stoichiometry in forest ecosystems along the North-South Transect in eastern China (NSTEC), *Soil Biol.*

650 *Biochem.*, 104, 152-163, , 2017.

651 Xu, Z., Yu, G., Zhang, X., He, N., Wang, Q., Wang, S., Xu, X., Wang, R., Zhao, N. Biogeographical patterns of soil

652 microbial community as influenced by soil characteristics and climate across Chinese forest biomes, *Appl. Soil*

653 *Ecol.*, 124, 298-305, 2018.

654 Yu, G., Zheng, Z., Wang, Q., Fu, Y., Zhuang, J., Sun, X., Wang, Y. Spatiotemporal pattern of soil respiration of

655 terrestrial ecosystems in China: the development of a geostatistical model and its simulation., *Environ. Sci.*

- 656 Technol., 44, 6074-6080, 2010.
- 657 Zak, J.C., Willig, M.R., Moorhead, D.L., Wildman, H.G. Functional diversity of microbial communities: a quantitative  
658 approach, *Soil Biol. Biochem.*, 26, 1101-1108, 1994.
- 659 Zhang, X. S., Yang, D. A. Allocation and study on global change transects in China, *Quaternary Sci.*, 1, 43-52, 1995.  
660 (In Chinese)
- 661 Zhou, J., Deng, Y., Shen, L., Wen, C., Yan, Q., Ning, D., Qin, Y., Xue, K., Wu, L., He, Z., Voordeckers, J.W., Nostrand,  
662 J.D., Buzzard, V., Michaletz, S.T., Enquist, B.J., Weiser, M.D., Kaspari, M., Waide, R., Yang, Y., Brown, J.H.  
663 Temperature mediates continental-scale diversity of microbes in forest soils, *Nat. Commun.*, 7, 12083, 2016.

## 664 **Figures legends**

665 **Fig. 1.** Distribution of typical forest ecosystems along the North-South Transect of eastern China (NSTEC). The  
666 abbreviations for the sampling sites from north to south are as follows: HZ, Huzhong; LS, Liangshui; CB, Changbai;  
667 DL, Dongling; TY, Taiyue; SN, Shennong; JL, Jiulian; DH, Dinghu; JF, Jiangfeng. These abbreviations are used for  
668 the nine forests throughout.

669 **Fig.2.** Variations in soil microbial substrate use during a 240-h incubation for the nine forests. Different colors  
670 represent different forest types: Yellow, coniferous forest; Dark yellow, coniferous broad-leaved mixed forest; Purple,  
671 deciduous broad-leaved forest; Olive, subtropical evergreen broad-leaved forest; Orange, Tropical monsoon forest.  
672 Different lowercase letters indicate significant differences among forests in the same climate zone. The abbreviations  
673 of the sampling sites are given in Table 1.

674 **Fig. 3.** Characteristics of microbial use of (a) carbohydrates, (b) carboxylic acids, (c) amino acids, (d) polymers, (e)  
675 amines, and (f) miscellaneous along the NSTEC. The representatives of different colors were showed in Figure 2.

676 **Fig.4.** Redundancy analysis (RDA) ordination biplot of soil microbial carbon sources use efficiency and  
677 environmental properties. The representatives of different colors were showed in Figure 2. The dotted lines and solid  
678 lines represent the environmental variables and lipid signatures and carbon sources. The abbreviations of the variables  
679 in this figure are as follows: MAP, mean annual precipitation. The vegetation data: LDMC, leaf dry matter weight;  
680 Leaf C, leaf carbon content; Leaf N, leaf nitrogen content; SLA, specific leaf area. Soil properties included SMC, soil  
681 moisture content; Silt, soil silt content; TN, soil total nitrogen; SOC, soil organic carbon. The abbreviations of the  
682 sampling sites were given in Table 1

683 **Fig.5.** The heatmap of the Pearson's correlation coefficients between the use of individual substrates and microbial  
684 PLFAs and soil enzyme activities. Note: The abbreviations of the variables: Actino-, actinomycetes; F/B,  
685 fungi/bacteria; G<sup>+</sup>, gram positive bacteria; G<sup>-</sup>, gram negative bacteria; G<sup>+</sup>/G<sup>-</sup>, Gram-positive bacteria/ Gram-negative  
686 bacteria. BG,  $\beta$ -1, 4-glucosidase; NAG,  $\beta$ -1,4-N-acetylglucosaminidase; LAP, leucine aminopeptidase; AP, acid  
687 phosphatase. \*\* $P < 0.01$ , \* $P < 0.05$ .

688 **Fig. 6.** Relationships between soil carbon mineralization rates ( $\mu\text{g C g}^{-1}\text{d}^{-1}$ ) and microbial biomass C (MBC), soil  
689 dissolved organic C (DOC), average well color development (AWCD), and individual substrate use.

690 **Fig. 7.** Relationships between soil carbon mineralization rates ( $\mu\text{g C g}^{-1}\text{d}^{-1}$ ) and different groups of soil microbial  
691 PLFAs (a-h) and enzyme activities (i-l).

692  
693

## 694 **Supporting information**

695 **Table S1** Average values of forest soil enzyme activities and different PLFA groups along the NSTEC.

696 **Table S2** Plant diversity and community weighted means of plant functional traits

697 **Table S3** Soil organic matter (SOM) decomposition rates during the 28 days of incubation time (Mean  $\pm$  SE) ( $\mu\text{g C}$   
698  $\text{g}^{-1}\text{d}^{-1}$ )

699 **Fig. S1** Variations in the average well color development (AWCD) values during a 240-h incubation for the nine  
700 forests. The abbreviations of the sampling sites are the same as those in Table 1.

701  
702

**Tables**

**Table 1.** The main characteristics of the sampling sites along the North South Transect of East China

| Sampling Sites  | Longitude (E) | Latitude (N) | Elevation (m) | MAT <sup>b</sup> (°C) | MAP <sup>b</sup> (mm) | Vegetation types                                  | Soil type           |
|-----------------|---------------|--------------|---------------|-----------------------|-----------------------|---------------------------------------------------|---------------------|
| HZ <sup>a</sup> | 123°01'12"    | 51°46'48"    | 850           | -3.7                  | 473                   | Cold temperate coniferous forest                  | Spodosols           |
| LS              | 128°53'51"    | 47°11'06"    | 401           | 0.01                  | 648                   | Temperate conifer broad-leaved mixed forest       | Albi-Boric Argosols |
| CB              | 128°05'27"    | 42°24'16"    | 758           | 2.8                   | 691                   | Temperate conifer broad-leaved mixed forest       | Albi-Boric Argosols |
| DL              | 115°25'24"    | 39°57'27"    | 972           | 6.6                   | 539                   | Warm temperate deciduous broad-leaved forest      | Alfisols            |
| TY              | 112°04'39"    | 36°41'43"    | 1668          | 6.0                   | 644                   | Warm temperate deciduous broad-leaved forest      | Alfisols            |
| SN              | 110°29'43"    | 31°19'15"    | 1510          | 8.5                   | 1447                  | Subtropical deciduous evergreen mixed forest      | Inceptisols         |
| JL              | 114°26'28"    | 24°35'05"    | 562           | 18.2                  | 1770                  | Subtropical evergreen broad-leaved forest         | Ultisols            |
| DH              | 112°32'14"    | 23°10'25"    | 240           | 21.8                  | 1927                  | Subtropical monsoon evergreen broad-leaved forest | Ultisols            |
| JF              | 108°51'26"    | 18°44'18"    | 809           | 23.2                  | 2266                  | Tropical monsoon forest                           | Ultisols            |

703 a:HZ, Huzhong; LS, Liangshui; CB, Changbai; DL, Dongling; TY,Taiyue; SN, Shennong; JL, Jiulian; DH, Dinghu; JF, Jiangfeng.

704 b: MAT, mean annual temperature; MAP, mean annual precipitation.

705

**Table 2.** Soil properties of different sampling sites

| Sampling site | pH         | ST<br>(°C) | SMC<br>(%)  | Silt<br>(%) | SOC<br>(g kg <sup>-1</sup> ) | MBC<br>(mg kg <sup>-1</sup> ) | DOC<br>(mg kg <sup>-1</sup> ) | TN<br>(g kg <sup>-1</sup> ) | TP<br>(g kg <sup>-1</sup> ) |
|---------------|------------|------------|-------------|-------------|------------------------------|-------------------------------|-------------------------------|-----------------------------|-----------------------------|
| HZ            | 6.79±0.02a | 10.3±0.15g | 45.3±0.90c  | 56±1.2c     | 42.29±0.47b                  | 350±6.0a                      | 240±7.6e                      | 2.90±0.16d                  | 0.87±0.02b                  |
| LS            | 6.17±0.02b | 15.9±0.02f | 46.9±0.76c  | 64±0.3b     | 62.08±7.20a                  | 316±0.7a                      | 204±4.9f                      | 4.59±0.29b                  | 0.59±0.02c                  |
| CB            | 6.37±0.04b | 16.0±0.06f | 102.8±0.25a | 76±0.6a     | 72.38±2.00a                  | 178±8.8b                      | 314±8.6c                      | 6.05±0.17a                  | 1.67±0.08a                  |
| DL            | 6.87±0.02a | 17.8±0.14e | 32.4±0.30e  | 6±2.4e      | 38.83±0.41c                  | 43±0.8e                       | 284±2.6d                      | 3.17±0.04d                  | 0.56±0.01c                  |
| TY            | 6.85±0.05a | 16.0±0.12f | 36.0±0.23d  | 49±1.4d     | 41.34±2.75c                  | 115±4.0c                      | 226±13.8f                     | 2.43±0.15e                  | 0.52±0.01c                  |
| SN            | 6.93±0.01a | 18.4±0.12d | 50.5±0.63b  | 74±0.3a     | 36.13±1.26c                  | 72±13.1e                      | 311±13.2c                     | 3.76±0.05c                  | 0.81±0.01b                  |
| JL            | 5.57±0.19b | 25.3±0.01a | 39.0±0.89d  | 68±0.3b     | 31.55±1.82c                  | 89±19.7d                      | 387±1.9b                      | 2.28±0.09e                  | 0.36±0.01d                  |
| DH            | 5.43±0.03c | 24.4±0.04b | 37.8±0.38d  | 50±1.8d     | 28.47±0.54d                  | 38±0.1e                       | 334±7.7c                      | 1.77±0.02f                  | 0.20±0.01e                  |
| JF            | 6.32±0.01c | 22.5±0.07c | 38.6±0.12d  | 49±0.2d     | 29.38±0.94d                  | 140±1.3c                      | 458±6.6a                      | 1.99±0.02e                  | 0.15±0.01e                  |

706

Note: ST=temperature of 0–10 cm soil; SMC=soil moisture content; Silt=soil silt content; SOC=soil organic carbon; MBC=microbial biomass carbon; DOC=dissolved organic carbon; TN=soil total nitrogen; TP=soil total phosphorus. Values were presented as means ± SE (n=4). The abbreviations of the sampling sites were given in the Table 1.

707



708

**Table 3.** Functional diversity of soil microbial communities in forest ecosystems along the NSTEC

| <b>Sampling sites</b> | <b>Richness (R)</b> | <b>Shannon <math>H'</math></b> | <b>Shannon <math>E</math></b> | <b>Simpson <math>D</math></b> |
|-----------------------|---------------------|--------------------------------|-------------------------------|-------------------------------|
| <b>HZ</b>             | 14.08±0.34d         | 2.65±0.03d                     | 1.01±0.007b                   | 0.91±0.002c                   |
| <b>LS</b>             | 25.29±0.14b         | 3.12±0.02b                     | 0.98±0.003c                   | 0.95±0.001a                   |
| <b>CB</b>             | 27.00±0.27a         | 3.22±0.01a                     | 0.98±0.001c                   | 0.95±0.001a                   |
| <b>DL</b>             | 11.54±0.47e         | 2.52±0.03e                     | 1.04±0.010a                   | 0.87±0.005d                   |
| <b>TY</b>             | 22.33±0.87c         | 3.02±0.02c                     | 0.98±0.002c                   | 0.94±0.001a                   |
| <b>SN</b>             | 28.10±0.34a         | 3.24±0.01a                     | 0.97±0.001c                   | 0.95±0.001a                   |
| <b>JL</b>             | 23.54±0.07c         | 3.04±0.01c                     | 0.96±0.001c                   | 0.93±0.003b                   |
| <b>DH</b>             | 25.65±0.71b         | 3.11±0.01b                     | 0.97±0.001c                   | 0.93±0.002b                   |
| <b>JF</b>             | 27.63±0.68a         | 3.19±0.02a                     | 0.96±0.001c                   | 0.95±0.002a                   |

709

Indices were calculated based on the optical density values after incubation for 96 h. Data are expressed as means±standard errors. Different lowercase letters indicate significant differences among forests. The abbreviations of the sampling sites are the same as those used in Table 1.

710

711

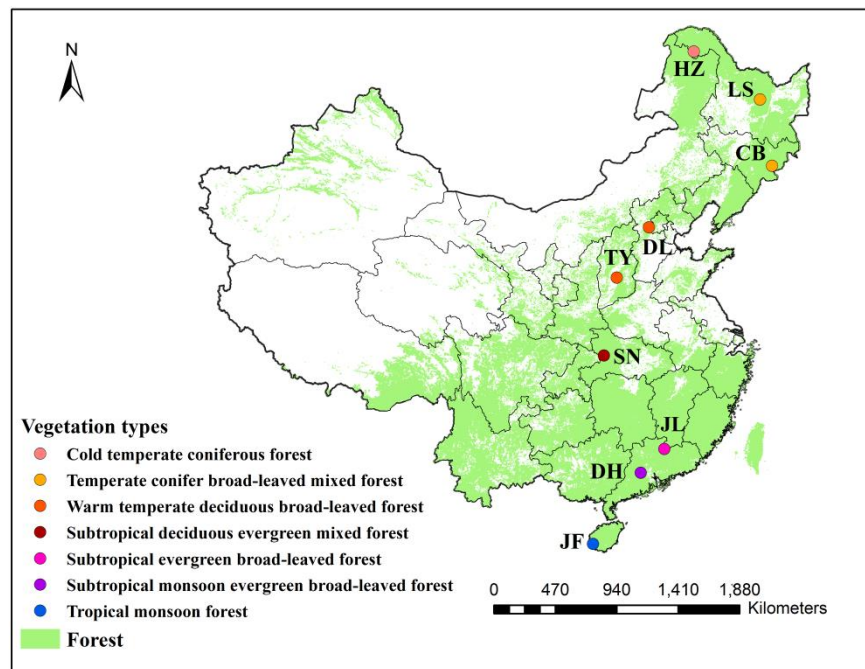

713 **Figure 1.** Distribution of typical forest ecosystems along the North-South Transect of eastern China (NSTEC).  
 714 The abbreviations of sampling sites from north to south are as follows: HZ, Huzhong; LS, Liangshui; CB,  
 715 Changbai; DL, Dongling; TY, Taiyue; SN, Shennong; JL, Jiulian; DH, Dinghu; JF, Jiangfeng.  
 716

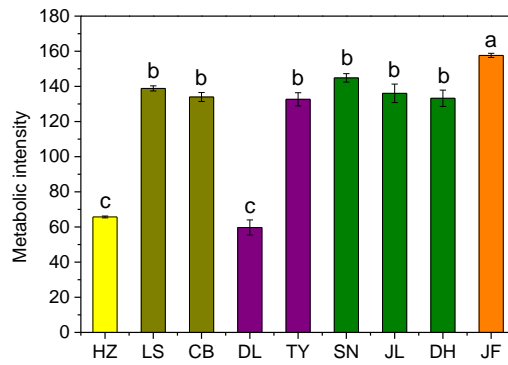

717  
718  
719  
720  
721  
722

**Figure 2.** Variations in soil microbial substrate use during a 240-h incubation for the nine forests. Different colors represent different forest types: Yellow, coniferous forest; Dark yellow, coniferous broad-leaved mixed forest; Purple, deciduous broad-leaved forest; Olive, subtropical evergreen broad-leaved forest; Orange, Tropical monsoon forest. Different lowercase letters indicate significant differences among forests in the same climate zone. The abbreviations of the sampling sites are given in Table 1.

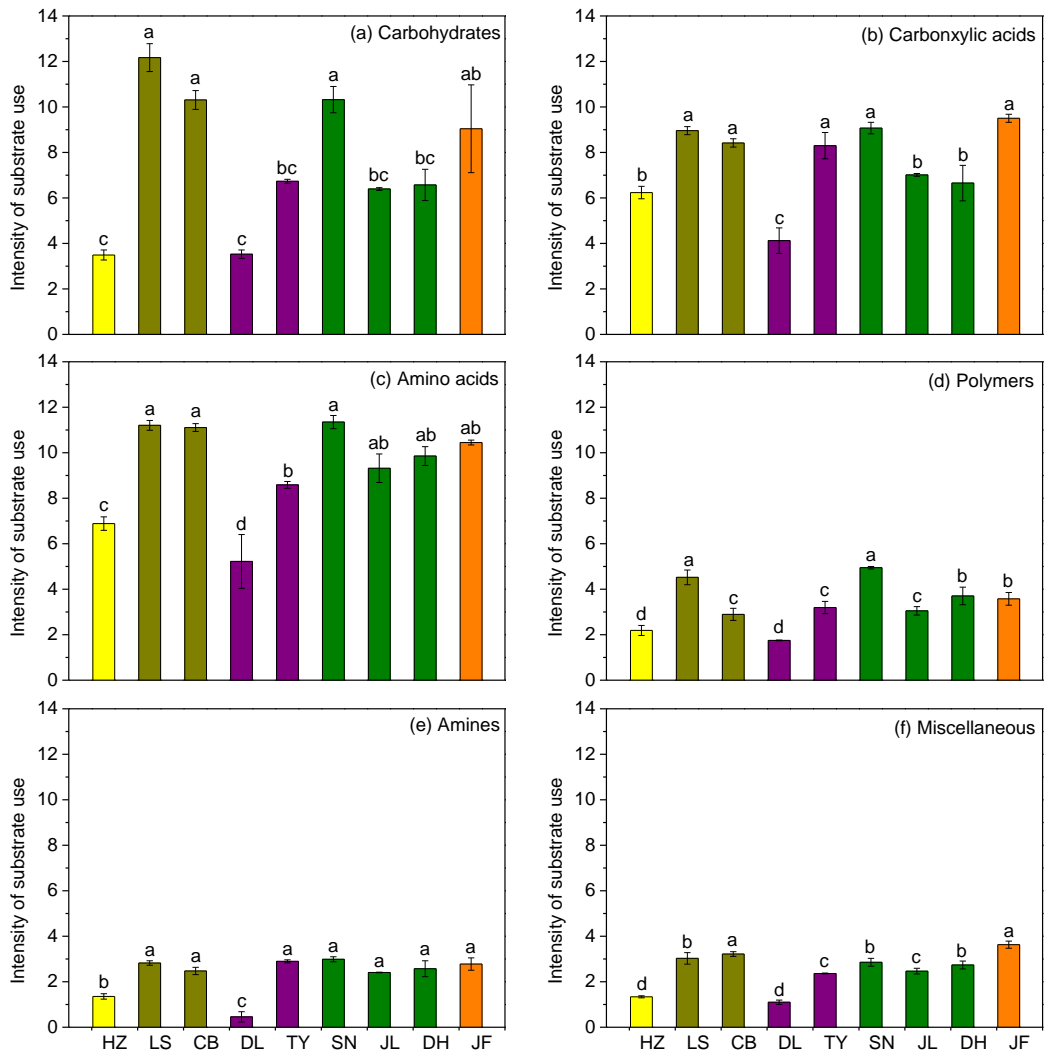

723  
724  
725  
726

**Figure 3.** Characteristics of microbial use of (a) carbohydrates, (b) carboxylic acids, (c) amino acids, (d) polymers, (e) amines, and (f) miscellaneous along the NSTEC. The representatives of different colors were showed in Figure 2.

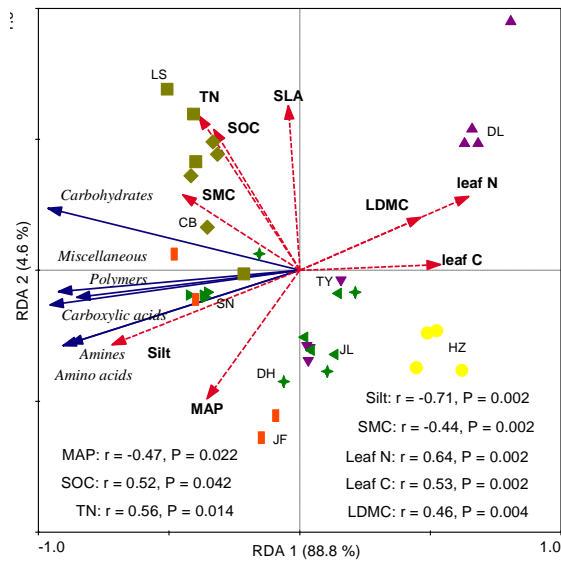

727  
728  
729  
730  
731  
732  
733  
734

**Figure 4.** Redundancy analysis (RDA) ordination biplot of soil microbial carbon sources use efficiency and environmental properties. The representatives of different colors were showed in Figure 2. The dotted lines and solid lines represent the environmental variables and lipid signatures and carbon sources. The abbreviations of the variables in this figure are as follows: MAP, mean annual precipitation. The vegetation data: LDMC, leaf dry matter weight; Leaf C, leaf carbon content; Leaf N, leaf nitrogen content; SLA, specific leaf area. Soil properties included SMC, soil moisture content; Silt, soil silt content; TN, soil total nitrogen; SOC, soil organic carbon. The abbreviations of the sampling sites were given in Table 1.

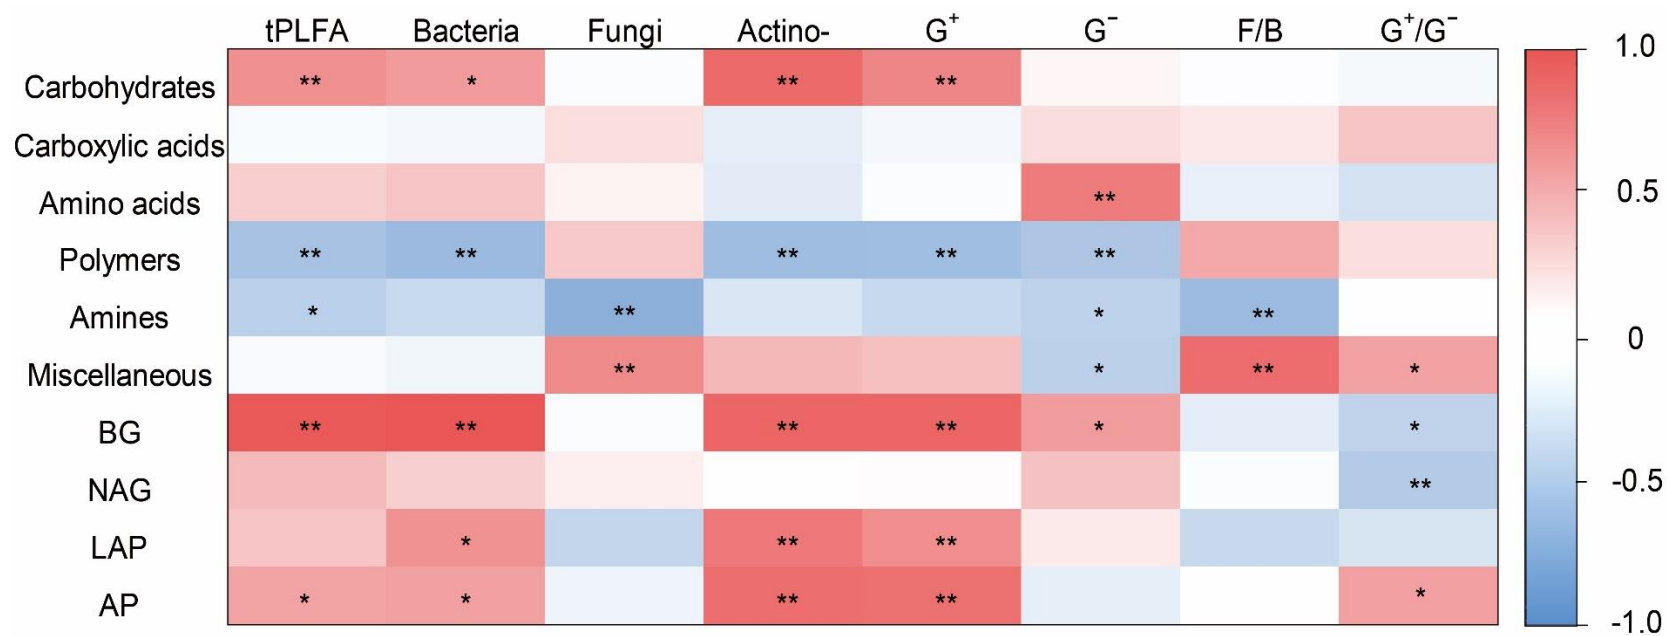

735 **Figure 5.** The heatmap of the Pearson's correlation coefficients between the use of individual substrates and microbial PLFAs and soil enzyme activities. Note: The abbreviations of the variables:  
 736 Actino-, actinomycetes; F/B, fungi/bacteria; G<sup>+</sup>, gram positive bacteria; G<sup>-</sup>, gram negative bacteria; G<sup>+</sup>/G<sup>-</sup>, Gram-positive bacteria/ Gram-negative bacteria. BG, β-1, 4-glucosidase; NAG, β-1,4-  
 737 N-acetylglucosaminidase; LAP, leucine aminopeptidase; AP, acid phosphatase. \*\**P* < 0.01, \**P* < 0.05.  
 738

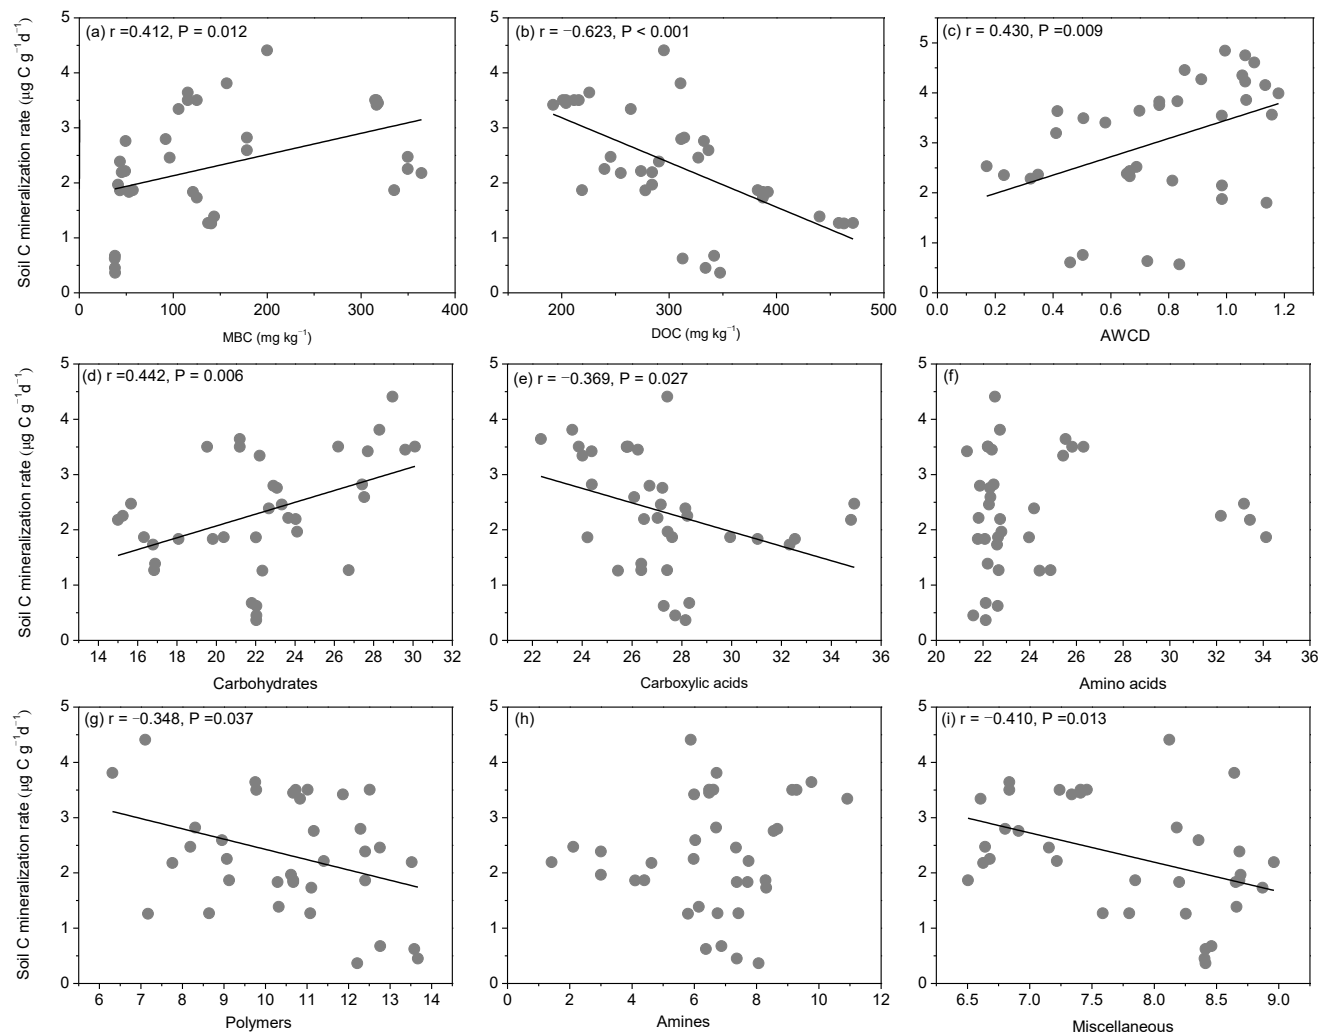

739  
740  
741

**Figure 6.** Relationships between soil carbon mineralization rates ( $\mu\text{g C g}^{-1} \text{d}^{-1}$ ) and microbial biomass C (MBC), soil dissolved organic C (DOC), average well color development (AWCD), and use of individual substrates.

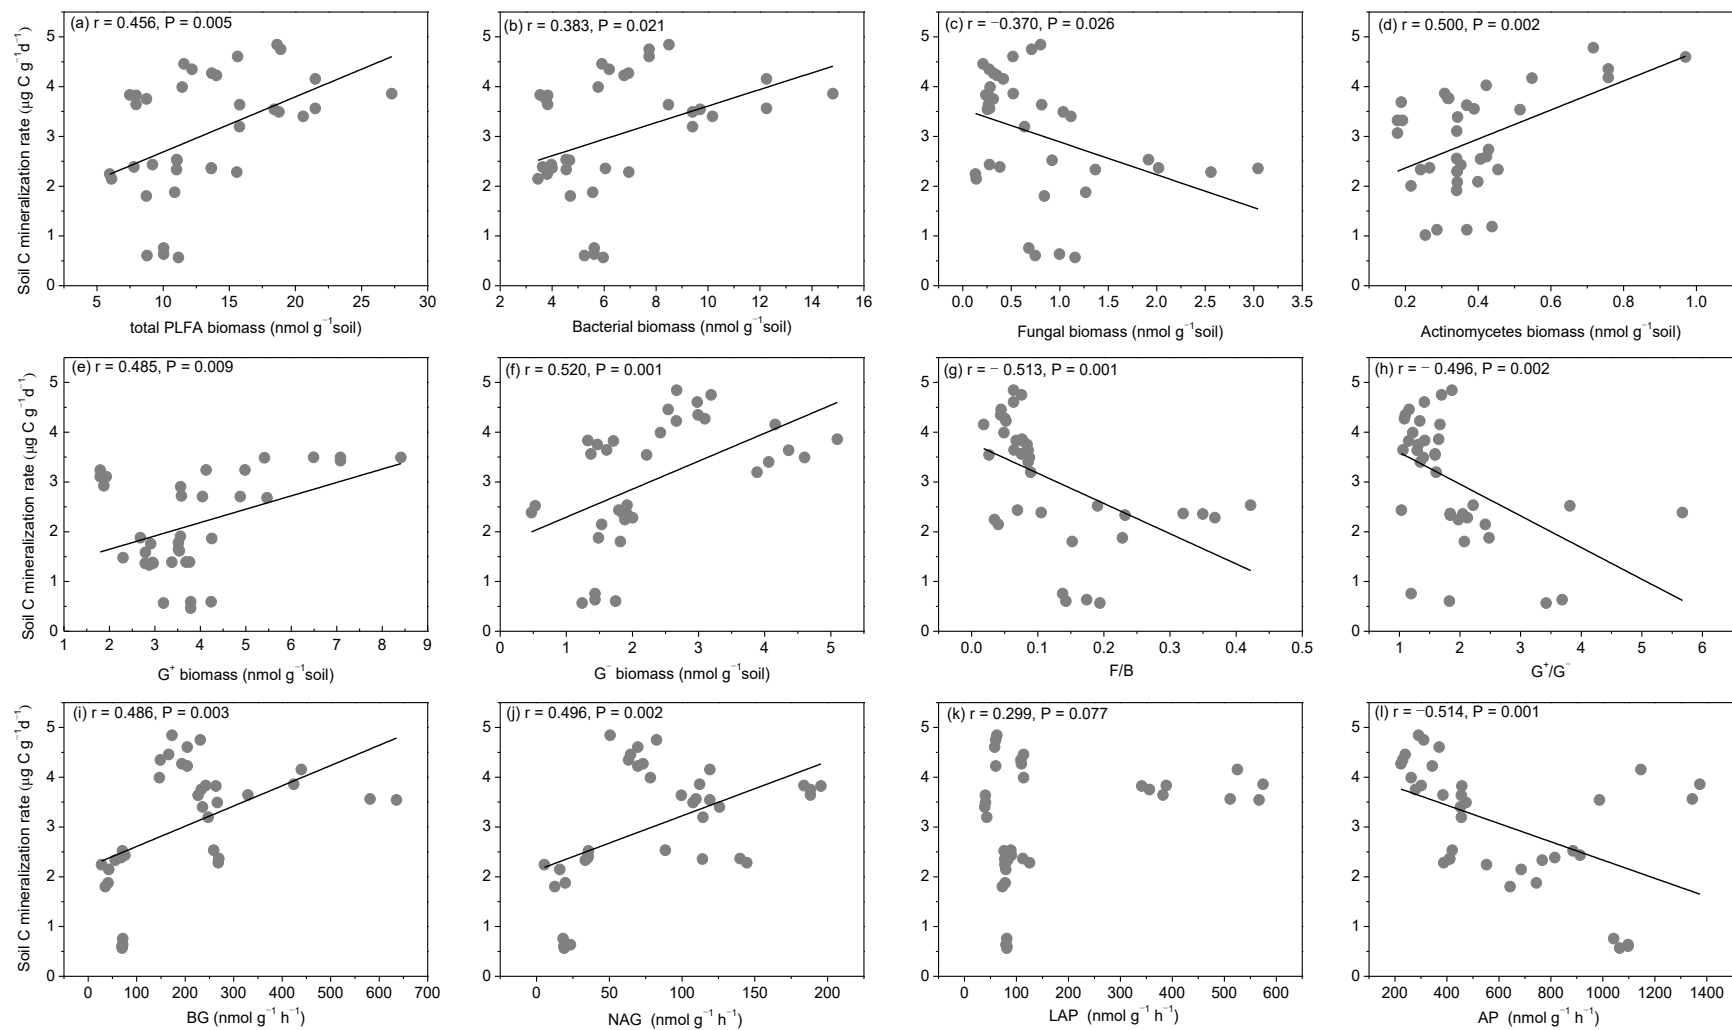

742  
743

**Figure 7.** Relationships between soil carbon mineralization rates ( $\mu\text{g C g}^{-1} \text{d}^{-1}$ ) and different groups of soil microbial PLFAs (a-h) and enzyme activities (i-l).



Table S1 Average values of forest soil enzyme activity and different group of PLFAs along the NSTEC.

| Sampling site | Enzyme activities |          |          |           |          | PLFAs     |          |         |            |                |                |                                |
|---------------|-------------------|----------|----------|-----------|----------|-----------|----------|---------|------------|----------------|----------------|--------------------------------|
|               | BG                | NAG      | LAP      | AP        | tPLFA    | Bacteria  | Fungi    | Acti-   | F/B        | G <sup>+</sup> | G <sup>-</sup> | G <sup>+</sup> /G <sup>-</sup> |
| HZ            | 244±8.6           | 111±5.5  | 41±0.8   | 459±5.0   | 17.7±1.2 | 9.4 ±0.4  | 0.9±0.1  | 0.4±0.2 | 0.09 ±0.01 | 4.5±0.4        | 4.23±0.2       | 1.4±0.1                        |
| LS            | 203±12.0          | 68±6.6   | 60±0.8   | 3297±17.5 | 16.8±1.2 | 7.9±0.4   | 0.6±0.1  | 0.5±0.4 | 0.06±0.01  | 4.5±0.4        | 2.88±0.1       | 1.6±0.1                        |
| CB            | 520±52.3          | 115±2.4  | 545±15.5 | 1213±90.6 | 22.2±1.9 | 12.3± 1.0 | 0.4±0.1  | 0.8±0.1 | 0.05±0.02  | 7.3± 0.4       | 3.21±0.9       | 1.6±0.1                        |
| DL            | 266±2.5           | 122±12.9 | 101±10.9 | 407±6.9   | 13.5±0.9 | 5.4±0.7   | 2.4±0.3  | 0.3±0.3 | 0.36±0.02  | 3.52±0.3       | 1.92±0.1       | 2.1±0.1                        |
| TY            | 267±21.9          | 189±2.4  | 367±11.1 | 356±41.0  | 8.0±0.3  | 3.7±0.1   | 0.3±0.1  | 0.2±0.1 | 0.07±0.01  | 1.85±0.1       | 1.53±0.1       | 1.2±0.1                        |
| SN            | 163±10.7          | 70±3.6   | 111±1.3  | 239±8.6   | 12.2±0.5 | 6.2±0.3   | 0.3±0.1  | 0.3±0.1 | 0.05±0.01  | 3.02±0.1       | 2.76±0.2       | 1.1±0.1                        |
| JL            | 67±4.3            | 35±0.5   | 83±2.9   | 845±33.2  | 9.8±0.8  | 4.2±0.2   | 0.7±0.3  | 0.3±0.1 | 0.15±0.04  | 3.17±0.2       | 1.18±0.4       | 3.1±1.0                        |
| DH            | 71±0.4            | 20±1.2   | 81±0.4   | 1075±13.6 | 10.0±0.5 | 5.6±0.2   | 0.9±0.1  | 0.3±0.1 | 0.16±0.01  | 3.75±0.2       | 1.46±0.1       | 2.5±0.6                        |
| JF            | 37±3.4            | 14±3.1   | 77±1.4   | 656±40.5  | 7.9±1.2  | 4.4±0.5   | 0.6± 0.3 | 0.3±0.1 | 0.11±0.05  | 3.16±0.4       | 1.68±0.1       | 2.2±0.1                        |

All values are presented as means ± SE (n=4). The enzyme activity (nmol·h<sup>-1</sup> g<sup>-1</sup> dry soil) and PLFAs (nmol·g<sup>-1</sup> dry soil). C acquisition is represented by β-1,4-glucosidase (BG); N acquisition is measured by the potential activities of β-1,4-N-acetylglucosaminidase (NAG) and leucine aminopeptidase (LAP); P acquisition is measured as acid (alkaline) phosphatase (AP) activity. tPLFA, total PLFAs, Acti-, actinomycetes, F/B, fungi/bacteria; G<sup>+</sup>/G<sup>-</sup>, Gram-positive bacteria/ Gram-negative bacteria. The abbreviations of the sampling sites were showed in table 1.

**Table S2** The plant diversity and community weighted means of plant functional traits

| Sites | H'   | LDMC<br>(mg g <sup>-1</sup> ) | SLA<br>(m <sup>2</sup> kg <sup>-1</sup> ) | Leaf C<br>(g kg <sup>-1</sup> ) | Leaf N<br>(g kg <sup>-1</sup> ) |
|-------|------|-------------------------------|-------------------------------------------|---------------------------------|---------------------------------|
| HZ    | 0.53 | 365.6                         | 8.5                                       | 487.5                           | 19.4                            |
| LS    | 2.05 | 345.5                         | 12.1                                      | 441.6                           | 18.5                            |
| CB    | 2.14 | 287.8                         | 18.5                                      | 108.7                           | 6.12                            |
| DL    | 2.74 | 408.1                         | 11.3                                      | 447.6                           | 25.1                            |
| TY    | 1.01 | 421.6                         | 9.5                                       | 494.0                           | 19.5                            |
| SN    | 2.61 | 289.8                         | 8.7                                       | 332.7                           | 13.5                            |
| JL    | 2.73 | 359.3                         | 6.2                                       | 392.6                           | 14.2                            |
| DH    | 2.09 | 412.2                         | 6.4                                       | 463.1                           | 16.2                            |
| JF    | 4.08 | nd                            | nd                                        | nd                              | nd                              |

H': the diversity of the tree species; LDMC: the oven-dried mass of a leaf divided by its water-saturated fresh mass, SLA: the one-sided area of a fresh leaf divided by its oven-dried mass; Leaf C: Leaf carbon concentration; Leaf N: Leaf nitrogen concentration. nd: none detected. The abbreviations of the sampling sites were showed in table 1.

**Table S3** The soil organic matter (SOM) decomposition rates during the 28 days of incubation time (Mean  $\pm$  SE) ( $\mu\text{gC}\cdot\text{g}^{-1}\text{d}^{-1}$ )

| Sites | 1d               | 7d               | 14d              | 21d              | 28d              | Average          |
|-------|------------------|------------------|------------------|------------------|------------------|------------------|
| HZ    | 3.23 $\pm$ 0.24c | 4.69 $\pm$ 0.27a | 3.40 $\pm$ 0.17b | 3.64 $\pm$ 0.03a | 2.19 $\pm$ 0.13b | 3.43 $\pm$ 0.09b |
| LS    | 6.17 $\pm$ 0.19a | 4.60 $\pm$ 0.44a | 4.97 $\pm$ 0.17a | 3.83 $\pm$ 0.17a | 3.47 $\pm$ 0.02a | 4.61 $\pm$ 0.14a |
| CB    | 3.74 $\pm$ 0.13b | 4.27 $\pm$ 0.23b | 3.36 $\pm$ 0.13b | 4.11 $\pm$ 0.09a | 3.41 $\pm$ 0.43a | 3.78 $\pm$ 0.14b |
| DL    | 2.82 $\pm$ 0.13d | 2.66 $\pm$ 0.08c | 1.96 $\pm$ 0.04c | 2.38 $\pm$ 0.02c | 2.10 $\pm$ 0.12b | 2.38 $\pm$ 0.05d |
| TY    | 3.92 $\pm$ 0.27b | 3.87 $\pm$ 0.20b | 3.75 $\pm$ 0.36b | 3.77 $\pm$ 0.04a | 3.50 $\pm$ 0.06a | 3.76 $\pm$ 0.04b |
| SN    | 6.36 $\pm$ 0.19a | 5.36 $\pm$ 0.24a | 3.87 $\pm$ 0.08b | 3.19 $\pm$ 0.16b | 2.56 $\pm$ 0.14b | 4.27 $\pm$ 0.10a |
| JL    | 2.88 $\pm$ 0.08d | 2.29 $\pm$ 0.09c | 2.40 $\pm$ 0.08c | 2.70 $\pm$ 0.08c | 1.82 $\pm$ 0.03c | 2.42 $\pm$ 0.04d |
| DH    | 0.74 $\pm$ 0.05e | 0.58 $\pm$ 0.06d | 0.33 $\pm$ 0.01d | 1.03 $\pm$ 0.12d | 0.53 $\pm$ 0.07e | 0.64 $\pm$ 0.04f |
| JF    | 2.21 $\pm$ 0.06d | 1.71 $\pm$ 0.20c | 1.72 $\pm$ 0.29c | 3.14 $\pm$ 0.09b | 1.30 $\pm$ 0.03d | 2.02 $\pm$ 0.11e |

Data labeled with different letters indicated soil organic matter (SOM) decomposition rates were significantly different at  $P < 0.01$ . The abbreviations of the sampling sites were given in the Table 1.

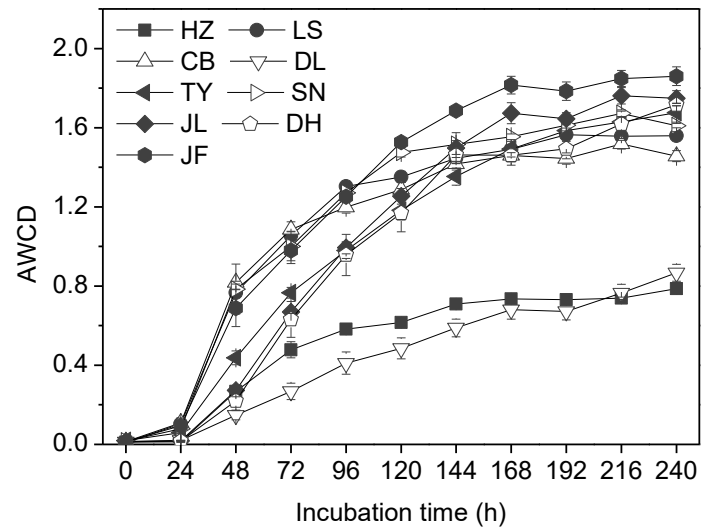

**Fig.S1** Variation of the average well color development (AWCD) values during a 240-h incubation for the nine forests. The abbreviations of the sampling sites were showed in table 1.

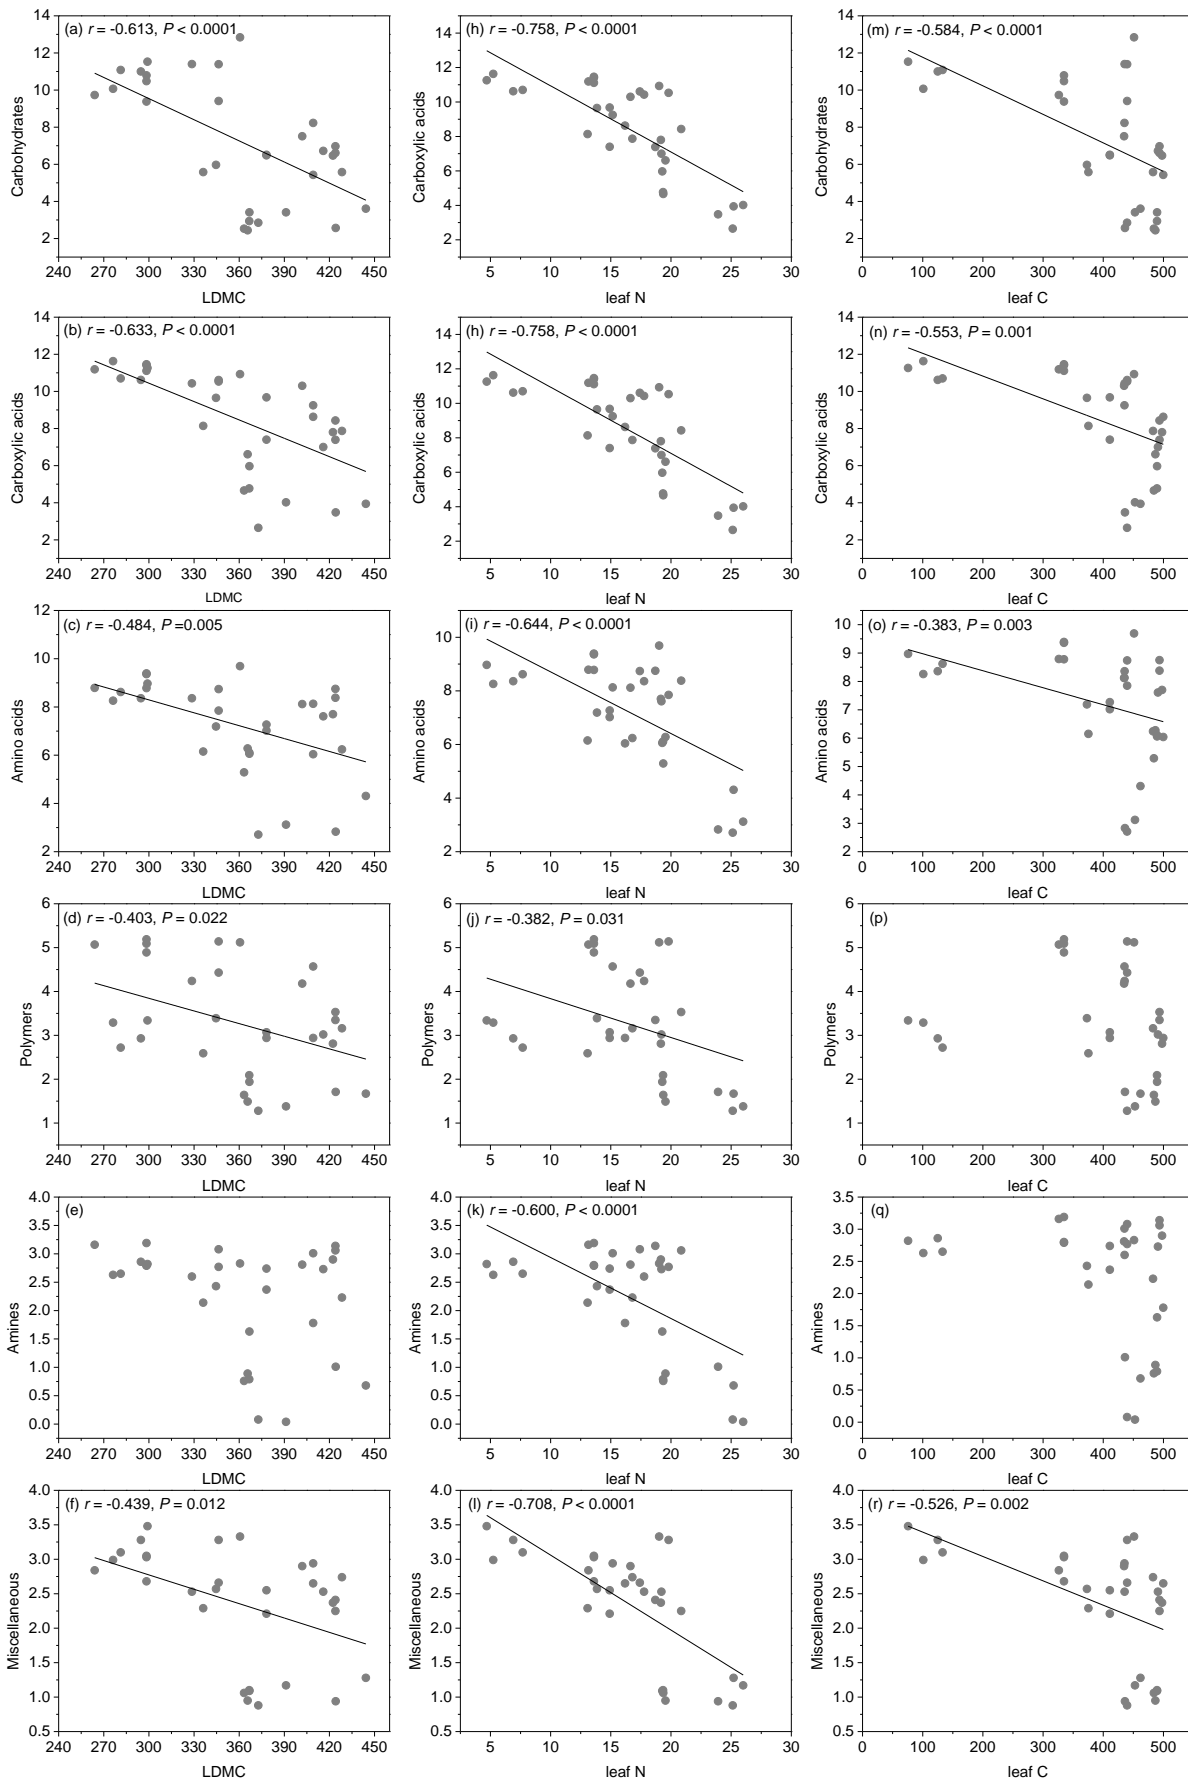

Fig.S2 The Pearson's correlation coefficients between the use of individual substrates and plant functional traits.

# 1 **Plant functional traits determine latitudinal variations** 2 **in soil microbial function: evidence from forests in** 3 **China** 4

5 Zhiwei Xu<sup>1,2,3</sup>, Guirui Yu<sup>4,5,\*</sup>, Qiufeng Wang<sup>4,5,\*</sup>, Xinyu Zhang<sup>4,5</sup>, Ruili Wang<sup>6</sup>, Ning Zhao<sup>7</sup>, Nianpeng  
6 He<sup>3,4</sup>, Ziping Liu<sup>1,2,3</sup>

7 1. Institute for Peat and Mire Research, College of Geographical Sciences, Northeast Normal  
8 University, Changchun, 130024, China

9 2. Jilin Provincial Key Laboratory for Wetland Ecological Processes and Environmental Change in  
10 the Changbai Mountains, Changchun, 130024, China

11 3. Education Ministry Key Laboratory for Geography Process and Ecological Security in the  
12 Changbai Mountains, Changchun, 130024, China

13 4. Key Laboratory of Ecosystem Network Observation and Modeling, Institute of Geographic  
14 Sciences and Natural Resources Research, Chinese Academy of Sciences, Beijing 10010, China.

15 5. College of Resources and Environment, University of Chinese Academy of Sciences, Beijing,  
16 100190, China

17 6. College of Forestry, Northwest A&F University, Yangling, 712100, China

18 7. Key Laboratory of Remote Sensing of Gansu Province, Heihe Remote Sensing Experimental  
19 Research Station, Cold and Arid Regions Environmental and Engineering Research Institute,  
20 Chinese Academy of Sciences, Lanzhou 730000, China

21  
22  
23 \* Corresponding author at: Key Laboratory of Ecosystem Network Observation and Modeling,  
24 Institute of Geographic Sciences and Natural Resources Research, Chinese Academy of Sciences,  
25 Beijing 100101, China.No. 11A, Datun Road, Chaoyang District, Beijing, 100101, China. Tel.: +86-  
26 10-64889268; fax: +86 10 64889432.

27 E-mail: [yugr@igsnr.ac.cn](mailto:yugr@igsnr.ac.cn) (G. Y.), [qfwang@igsnr.ac.cn](mailto:qfwang@igsnr.ac.cn) (Q. W.)

28 **Abstract.** Plant functional traits have increasingly been studied as determinants of ecosystem  
29 properties, especially for soil biogeochemical processes. While the relationships between biological  
30 community structures and ecological functions are a central issue in ecological theory, these  
31 relationships remain poorly understood at the large scale. We selected nine forests along the North–  
32 South Transect of Eastern China (NSTEC) to determine how plant functional traits influence the  
33 latitudinal pattern of soil microbial functions, and how soil microbial communities and functions are  
34 linked at the regional scale. We found that there was considerable latitudinal variation in the profiles  
35 of different substrate use along the NSTEC. Specifically, we found that the substrate use by  
36 microorganisms was highest in the temperate forest soils (intensities of 10–12), followed by the  
37 subtropical forest soils (intensities of 7–10), and was least in the coniferous forest soils (intensities  
38 of 4–7). The latitudinal variation in soil microbial function was more closely related to plant  
39 functional traits ( $P=0.002$ ) than climate ( $P=0.022$ ). The soil silt, leaf dry matter, and leaf C and N  
40 contents were the main controls on the biogeographical patterns of microbial substrate use in these  
41 forest soils. The soil microbial community structures and functions were significantly correlated  
42 along the NSTEC. Soil carbohydrate and polymer substrate use were mainly related to soil G<sup>+</sup>  
43 bacterial and actinomycic PLFAs, while the use of amine and miscellaneous substrates were related  
44 to soil G<sup>-</sup> bacterial and fungal PLFAs. The enzyme production varied with changes in the soil  
45 microbial communities. The soil enzyme activities were positively correlated with the bacterial  
46 PLFAs but were not correlated with the fungal PLFAs. The soil organic matter (SOM) decomposition  
47 rates were significantly higher in the temperate forests than in the subtropical and tropical forests,  
48 emphasizing the rapid degradability of high-energy substrates, such as soil microbial biomass carbon,  
49 carbohydrates, and amino acids. The SOM decomposition rates were significantly and negatively  
50 related to soil dissolved organic carbon concentrations, carboxylic acids, polymers, and  
51 miscellaneous substrate use. The relationships between soil PLFAs and microbial substrate use,  
52 enzyme activities, and SOM decomposition rate show that, as the soil microbial community structure  
53 changes, soil biogeochemical processes also change.

54 **Abbreviations**

|    |                              |                                       |
|----|------------------------------|---------------------------------------|
| 55 | NSTEC                        | North-South Transect of Eastern China |
| 56 | AWCD                         | Average well color development        |
| 57 | RDA                          | Redundancy analysis                   |
| 58 | Soil microbial community     |                                       |
| 59 | PLFAs                        | Phospholipid fatty-acids              |
| 60 | G <sup>+</sup>               | Gram positive bacteria                |
| 61 | G <sup>-</sup>               | Gram negative bacteria                |
| 62 | F/B                          | Fungi/Bacteria                        |
| 63 | Soil enzyme activities       |                                       |
| 64 | BG                           | β-glucosidase                         |
| 65 | NAG                          | N-acetylglucosaminidase               |
| 66 | AP                           | Acid phosphatase                      |
| 67 | LAP                          | Leucine aminopeptidase                |
| 68 | Soil properties              |                                       |
| 69 | SMC                          | Soil moisture content                 |
| 70 | SOM                          | Soil organic matter                   |
| 71 | SOC                          | Soil organic carbon                   |
| 72 | TN                           | Total Nitrogen                        |
| 73 | DOC                          | Dissolved organic carbon              |
| 74 | MBC                          | Microbial biomass carbon              |
| 75 | Silt                         | Soil silt fractions (<53 μm)          |
| 76 | Plant functional properties: |                                       |
| 77 | CWM                          | Community-weighted means              |
| 78 | SLA                          | The specific leaf area                |
| 79 | LDMC                         | Leaf dry matter content               |
| 80 | Leaf C                       | Leaf C concentrations                 |
| 81 | Leaf N                       | Leaf N concentrations                 |



## 82 **1 Introduction**

83 The catabolic diversity of soil microbial communities is a useful indicator of how microbial functions  
84 adapt to environmental stress. It can be used to test fundamental questions about soil biological  
85 resistance and resilience (Jagadamma et al., 2014; Swallow and Quideau, 2015), and help us  
86 understand the role of microbial communities in different environments (Preston-Mafham et al.,  
87 2002). Biological community structure and function are intimately linked in ecological processes,  
88 and their relationships are a central issue in ecological theory (Talbot et al., 2014). Therefore, a major  
89 goal in ecological research is to identify and understand the mechanisms and relationships that control  
90 the structure and function of microbial communities over large spatial scales.

91 Numerous studies have documented how environmental and anthropogenic perturbations  
92 impact on the structure, diversity (Tu et al., 2016; Zhou et al., 2016), and enzyme activities (Peng  
93 and Wang, 2016; Xu et al., 2017) of soil microbial communities, and have reported that forests in the  
94 same climatic zone develop similar microbial communities. Other researchers have examined spatial  
95 patterns in soil microbial function at different scales. For example, Tian et al. (2015), from their study  
96 of Changbai Mountain, China, found that the soil microbial metabolic activity and functional  
97 diversity were spatially dependent. Others reported that soil microbial activities varied by forest type,  
98 with high local variation and significant separation along regional climate gradients (Brockett et al.,  
99 2012; Cao et al., 2016). Soil microbes from different climatic zones have different affinities for  
100 carbon substrates. For example, microorganisms from boreal pine forest soils used carboxylic acids  
101 more efficiently, but decomposed amino acids much less efficiently, than microorganisms from  
102 temperate forest soils (Klimek et al., 2016). The soil microbial metabolic abilities are also influenced  
103 by the dominant tree species, through the production of chemically-unique litter and root exudates,  
104 and the soil physico-chemical properties (Menyailo et al., 2002). Despite this, because of limitations  
105 in analytical methods, questions still remain about how soil microbial functions vary at the regional  
106 scale.

107 The functional diversity of soil microbial communities is regulated by physico-chemical soil  
108 properties (Gartzia-Bengoetxea et al., 2016), climate (Cao et al., 2016), and the composition of plant  
109 cover (Sherman and Steinberger, 2012). For example, the geographic patterns in soil microbial

110 activities mainly reflect the climate, soil pH, and total phosphorus concentrations over large  
111 geographic scales (Cao et al., 2016). Research has shown that substrate-induced respiration rates  
112 were higher in soil microbial communities that developed under beech and holm oak forests than  
113 under oak and pine forests (Gartzia-Bengoetxea et al., 2016). Plant functional traits have increasingly  
114 been studied as determinants of ecosystem properties, especially for soil biogeochemical processes  
115 (De Vries et al., 2012; Pei et al., 2016). Soil bacteria phospholipid fatty-acids (PLFAs) were found  
116 to be positively correlated with the community-weighted means (CWM) of plant functional traits  
117 (leaf nitrogen (N) concentration) (De Vries et al., 2012). The plant leaf dry matter content and the  
118 leaf carbon (C) to nitrogen (N) ratio both influence the multivariate soil microbial community  
119 structure, and these factors positively promote the abundances of specific microbial functional groups  
120 (Pei et al., 2016). Limited soil resources, particularly in tropical forests, mean that soil  
121 microorganisms may be more reliant on plants than soil for C and nutrients via rhizosphere exudation  
122 or litter production, which varies among plant species (Russell et al., 2007; Raich et al., 2014; Waring  
123 et al., 2015). While soil functional diversity has been used as an indicator of microbial metabolic  
124 potential, there have been few studies of the integrated effects of climate, vegetation, and soil  
125 substrate availability on large-scale soil microbial functional diversity.

126         Although the functional characteristics of soil microorganisms are at least as important as their  
127 patterns of community structure in biogeochemical studies, the links between microbial community  
128 structure and microbial functions are poorly understood. There are two current hypotheses about how  
129 microbes determine ecosystem process rates. In functional redundancy, different microbes perform  
130 the same function and so changes in the microbial community structure do not necessarily lead to a  
131 change in soil function (Balsler and Firestone, 2005; Strickland et al., 2009). For example, Banerjee  
132 et al. (2016) showed that the abundance of different bacterial and fungal groups changed by up to  
133 300-fold under straw- and nutrient-amended treatments but that the decomposition rate remained  
134 similar, indicating possible functional redundancy. The functional redundancy hypothesis has  
135 recently been challenged by a counter-hypothesis, referred to as functional dissimilarity, which  
136 suggests that diversity brings stability, and that every species plays a unique role in ecosystem  
137 function (Fierer et al., 2007; Waldrop and Firestone, 2006). Soil microbial community composition  
138 therefore, combined with environmental variables, may ultimately determine ecosystem process rates.

139 Waldrop and Firestone (2006) showed that gram positive bacteria ( $G^+$ ) were mainly responsible for  
140 the decomposition of pine needles and soil organic matter, but gram negative bacteria ( $G^-$ ) were  
141 mainly responsible for the decomposition of starch and xylose, which are easy to break down.  
142 Philippot et al. (2013), when studying the diversity of denitrifiers, showed that the loss of microbial  
143 diversity could result in decreases of between 4- and 5-fold in denitrification activity. In the  
144 Mediterranean, losses in the mass of decomposing leaf litter from shrub species accelerated as  
145 detritivore assemblages became more functionally dissimilar (Coulis et al., 2015). Research to date  
146 suggests that the different microbial communities will result in variations in soil microbial function  
147 and soil biochemical processes, so information about the relationships between soil microbial  
148 communities and their functions in natural ecosystems is urgently needed.

149 The North-South Transect of Eastern China (NSTEC) extends from a cold temperate coniferous  
150 forest in the north to a tropical rainforest in the south, and includes almost all the forest types found  
151 in the Northern Hemisphere (Zhang and Yang, 1995) (Fig. 1 and Table 1). This transect, therefore,  
152 provides the optimal environment for investigating large-scale geographical patterns in microbial  
153 communities and their responses to environmental changes. In this study, we examined spatial  
154 patterns in soil labile C concentrations, soil organic matter (SOM) decomposition rates, and  
155 metabolic activity and functional diversity of microbes in nine forest biomes along the NSTEC. We  
156 assessed how abiotic factors, such as climate, soil physical and chemical properties, and biotic factors,  
157 in the form of community-weighted means (CWM) of plant functional traits, contributed to soil  
158 functional diversity at the regional scale. We also examined the links between soil microbial  
159 community structure (PLFAs) and function (SOM decomposition rate, enzyme activities, and  
160 microbial substrate use). We tested four hypotheses in this study, as follows: (1) The profiles of soil  
161 microbial substrate use vary along a latitudinal gradient, (2) the functional characteristics of soil  
162 microbes are similar in closely related forest types, (3) biogeographical patterns of soil microbial  
163 substrate use are constrained by climate and plant functional traits, and (4) different soil microbial  
164 communities may have substrate use profiles and SOM decomposition rates.

## 165 **2 Material and methods**

### 166 2.1 Study area and soil sampling

167 We selected nine forest ecosystems along the NSTEC, namely Huzhong (HZ), Liangshui (LS),  
168 Changbai (CB), Dongling (DL), Taiyue (TY), Shennong (SN), Jiulian (JL), Dinghu (DH), and  
169 Jianfeng (JF) (18°44'–51°46'N, 128°53'–108°51'E) (Fig. 1, Table 1). Further information about the  
170 soil types and sites has been documented previously by Xu et al. (2017). Forest soils have been  
171 classified following the U.S. soil taxonomy and are described in Table 1 (Soil Survey Staff, 2010),  
172 where information about the climate and the dominant vegetation at each site is also presented.

173 Soil samples were collected from four random plots at each site in July and August 2013, as  
174 described previously by Xu et al. (2017). Briefly, we established four sampling plots measured 30 ×  
175 40 m and collected soil samples from a depth of between 0 and 10 cm at between 30 and 50 points  
176 in each plot along an S-shape. On return to the laboratory, the fresh soil samples were immediately  
177 sieved through a 2-mm mesh and subdivided into three subsamples. One subsample was stored briefly  
178 at 4 °C until analysis for soil enzyme activities and soil pH. Another was stored briefly at –20 °C  
179 until analysis for PLFAs and Eco-Biolog. The third was air-dried, sieved through a 0.25 mm mesh,  
180 and analyzed for soil nutrients.

## 181 2.2 Soil chemical analyses

182 Soil pH was measured at a soil-to-water ratio of 1:2.5. The soil moisture content (SMC) was  
183 measured gravimetrically on 20 g fresh soil that was oven-dried at 105 °C to constant weight  
184 immediately on arrival at the study sites' laboratories (Liu et al., 2012a). Soil organic carbon (SOC)  
185 and total N (TN) concentrations were determined by dry combustion of ground samples (100-mesh)  
186 in a C/N analyzer (Elementar, Vario Max CN, Germany). Total phosphorus (TP) was determined  
187 with a flow injection auto-analyzer following digestion with H<sub>2</sub>SO<sub>4</sub>-HClO<sub>4</sub> (Huang et al., 2011).  
188 After extraction with distilled water at a soil:distilled water ratio of 1:5, dissolved organic carbon  
189 (DOC) concentrations were determined by Liqui TOC II (Elementar, Liqui TOC II, Germany) (Jones  
190 and Willett, 2006). Soil microbial biomass carbon (MBC) was measured using the chloroform  
191 fumigation and direct extraction technique (Vance et al., 1987). A conversion factor of 2.64 was used  
192 to convert extracted C to biomass C. The silt fractions (<53 μm) of the samples were separated by  
193 wet-sieving and then were freeze-dried in the laboratory, as described by Six et al. (2000). The soil  
194 properties are shown in Table 2. We followed the method described by Bååth et al. (2003) for PLFA

195 analysis and PLFAs are expressed in units of  $\text{nmol g}^{-1}$ . The four enzymatic activities of  $\beta$ -glucosidase  
196 (BG), N-acetylglucosaminidase (NAG), acid phosphatase (AP), and leucine aminopeptidase (LAP)  
197 responsible for soil C, N, and phosphorous cycling, were measured following the procedure outlined  
198 in Saiya-Cork et al. (2002) and are expressed in units of  $\text{nmol h}^{-1} \text{g}^{-1}$ . Information about PLFA and  
199 enzyme activities are presented in Table S1.

200 The Biolog-ECO plates were purchased from Biolog, US. The substrates for BG, NAG, AP, and  
201 LAP were 4-MUB- $\beta$ -D-glucoside, 4-MUB-N-acetyl-b-D-glucosaminide, 4-MUB-phosphate, and L-  
202 Leucine-7-amino-4-methylcoumarin, and were stored at  $-20^\circ\text{C}$ . An MUB standard was used for the  
203 BG, NAG, and AP enzymes and an AMC standard was used for the LAP enzyme. The substrates and  
204 standards were purchased Sigma. Analytical grade reagents were used for the soil nutrient analysis.

### 205 2.3 Vegetation data

206 We established four sampling plots ( $30\times 40$  m) in each forest ecosystem. In each plot, we recorded all  
207 the tree individuals, and measured the height and diameter-at-breast-height (DBH) of each woody  
208 individual with a  $\text{DBH}\geq 2$  cm. The diversity of the tree species in the sampling plots was represented  
209 by  $H'$ , and the diversity ( $H'$ , Shannon-Wiener) of the tree species in the community was calculated  
210 as follows:

$$211 \quad H' = \sum_{i=0}^n (P_i \ln P_i)$$

212 Where  $P_i$  was the importance value of the species  $i$  as a proportion of all species, and  $n$  was the  
213 number of the species.

214 We also calculated the community-weighted means (CWM) values of the tree traits using the  
215 cover of each tree. As described by Xu et al. (2018), we collected litter and sun-exposed and mature  
216 leaves (leaf blades for trees) from between five and ten individuals of each plant species at each site  
217 and determined their TN and TC concentrations. We calculated the specific leaf area (SLA, the one-  
218 sided area of a fresh leaf divided by its oven-dried mass,  $\text{m}^2 \text{kg}^{-1}$ ), leaf dry matter content (LDMC,  
219 the oven-dried mass of a leaf divided by its water-saturated fresh mass,  $\text{mg g}^{-1}$ ), leaf C concentrations  
220 (leaf C,  $\text{g kg}^{-1}$ ), and leaf N concentrations (leaf N,  $\text{g kg}^{-1}$ ) for ten fully expanded leaves of each  
221 sampled individual. To measure the leaf traits at the community level, we calculated the CWM of the

222 tree layer, as follows:

$$223 \quad CWM = \sum_{i=1}^n p_i \times \text{trait}_i$$

224 Where  $p_i$  is the relative contribution of the species  $i$  to the cover of the whole community,  $n$  is the  
225 number of the most abundant species, and  $\text{trait}_i$  is the trait value of species  $i$ , as described by Garnier  
226 *et al.* (2004). The diversity of the tree species and plant functional traits are summarized in Table S2.

#### 227 2.4 Microbial substrate use

228 Microbial functional diversities were determined using a Biolog EcoPlate™ (Biolog Inc., Hayward,  
229 California, USA) as described by Garland and Mills (1991). Briefly, approximately 10 g of fresh soil  
230 was suspended in 100 ml saline solution (0.85% NaCl) and shaken on an orbital shaker for 30 min at  
231 190 rpm. A 150  $\mu$ l aliquot of supernatant from 1:1 000 dilutions of each soil sample was added to  
232 each well. The plates were incubated at 25°C, and the absorbance at 590 nm was measured using a  
233 microplate reader (GENios Pro™, Tecan Trading AG, Männedorf, Switzerland) every 24 h up to 240  
234 h (0, 24, 48, 72, 96, 120, 144, 168, 192, 216, and 240 h).

235 The Richness ( $R$ ), Shannon-Weiner diversity index ( $H'$ ), Shannon evenness index ( $E$ ), and  
236 Simpson dominance index ( $D$ ) were calculated from the absorption values after EcoPlate™  
237 incubation for 96 h (Gomez *et al.*, 2006). Additionally, the 31 C sources were divided into six groups,  
238 namely carbohydrates, carboxylic acids, amines, amino acids, polymers, and miscellaneous, as  
239 suggested by Zak *et al.* (1994). The average absorbance of all C sources within each group was  
240 computed as the intensity of the single substrate use. The soil microbial metabolic intensities ( $S$ ) were  
241 estimated by the area underneath  $AWCD$  vs.  $t$ , and were obtained by integrating the equation against  
242 time  $t$  (Guckert *et al.*, 1996):

$$243 \quad S = \sum [(v_i + v_{i-1})/2 \times (t_i + t_{i-1})]$$

244 Where  $v_i$  was the average optical density of the  $i$ th incubation time.

#### 245 2.5 SOM decomposition rate

246 Four replicates from each sampling site with a 60% water-holding capacity were incubated at 20°C.  
247 In brief, 40 g of each fresh soil sample were put into a 150-ml incubation bottle, and the samples

248 were then adjusted so that their moisture content corresponded to a water-holding capacity of 60%.  
249 During the 4-week incubation period, the soil respiration rates were measured on days 1, 7, 14, 21,  
250 and 28 using an automatic system. The SOM decomposition rates were calculated as described in the  
251 study of Xu et al. (2015).

## 252 2.6 Statistical analysis

253 One-way analysis of variance (ANOVA) followed by a post hoc Tukey HSD test were used to test  
254 the significance of the differences among the soil properties, C use, functional diversity, and SOM  
255 decomposition rates in the different forest ecosystems. We tested the relationships between labile C,  
256 soil microbial community structure, microbial function, and the SOM decomposition rates with the  
257 Pearson correlation test. Differences were considered significant when  $P < 0.05$ , with the marginal  
258 significance set at  $P < 0.01$ . All ANOVA and regression analyses were performed using SPSS 19.0  
259 for Windows. Data are reported as the mean  $\pm$  SE.

260 We used redundancy analysis (RDA) to examine the relationship between the environmental  
261 variables and soil microbial substrate use. The environmental variables were the same as those  
262 described in Xu et al. (2018), including climate, soil properties, litter properties, and plant functional  
263 traits. Before RDA, we conducted forward selection of the environmental variables that were  
264 significantly correlated with variations in the microbial substrate use profile using stepwise  
265 regression and the Monte Carlo Permutation Test. We used CANOCO software 4.5 (Ter Braak and  
266 Smilauer 2002) for the RDA and stepwise regression. The environmental properties, which were  
267 significantly correlated with the microbial substrate use in the RDA, were stressed in the plots.

## 268 **3 Results**

### 269 3.1 Patterns in the microbial substrate use, soil labile carbon, and SOM decomposition rates

270 Of the forests along the NSTEC, the C metabolic intensity of soil microbes was lowest in HZ and LS;  
271 the C metabolic intensity of soil microbes differed significantly between JF and the other forests (Fig.  
272 2), which indicates that the color development was significantly higher in the tropical forest soils  
273 than in the subtropical and temperate forest soils and is consistent with the variations in the AWCD

274 (Fig. S1). The average values of  $R$ ,  $H'$ , and  $D$  were significantly different among the nine forest soils  
275 and were highest in JF, SN, and CB (Table 3).

276 Across the nine forests, soil microorganisms used the six substrate groups in the same order; the  
277 carboxylic acid substrate was used most, followed by amino acids, carbohydrates, polymers, amines,  
278 and miscellaneous substrates (Fig. 3). Microorganisms in the boreal and temperate forests mainly  
279 metabolized carbohydrates, amino acids, and carboxylic acids, while those from the subtropical and  
280 tropical forests used the substrates in equal proportions. The substrate microbial use ability was  
281 highest in the coniferous broad-leaved mixed forest and tropical forest soils, and lowest in the  
282 coniferous forest soil (Fig. 3).

283 Overall, soil MBC concentrations in the boreal and temperate forests were three to eight times  
284 higher than those of the subtropical and tropical forests. In contrast, the average DOC concentrations  
285 in the tropical and subtropical forest soils, which ranged from 311 to 458 mg kg<sup>-1</sup>, were significantly  
286 higher than the average concentrations in the temperate and boreal forest soils, where the average  
287 concentrations ranged from 204 to 284 mg kg<sup>-1</sup> (Table 2). The average SOM decomposition rates in  
288 the subtropical forests ranged from 0.64 to 2.42 μg C g<sup>-1</sup> d<sup>-1</sup>, and were significantly lower than the  
289 rates in the temperate forests, which ranged from 3.43 to 4.61 μg C g<sup>-1</sup> d<sup>-1</sup> (Table S3).

### 290 3.2 Effect of environmental properties on soil microbial substrate use

291 Redundancy analysis showed that the variations in soil microbial substrate use were strongly and  
292 positively correlated with the CWM values of LDMC, leaf N, and leaf C, and strongly and negatively  
293 correlated with the soil silt content and SMC (Fig. 4). The RDA2 of soil microbial substrate use was  
294 strongly positively correlated with TN and SOC, but negatively correlated with the mean annual  
295 precipitation (MAP) (Fig. 5). RDA1 mainly represented the plant functional traits, soil texture, and  
296 micro-meteorological conditions, while RDA2 represented climate and soil nutrients. Overall, the  
297 soil silt content and the CWM values of plant functional traits were the main predictors of the  
298 latitudinal variation in the soil microbial substrate use along the NSTEC.

### 299 3.3 Relationships between soil microbial substrate use, enzyme activities, and PLFAs

300 Microbial carbohydrate use was positively related with bacterial biomass and actinomycic biomass



301 (Fig. 5). Microbial polymer use was negatively related with bacterial biomass and actinomycic  
302 biomass. Microbial amines use was negatively related with G<sup>-</sup> bacterial and fungal biomass.  
303 Miscellaneous substrate use was positively related with fungal biomass and G<sup>+</sup>/G<sup>-</sup> bacterial biomass  
304 (Fig. 5).

305 The abundance of G<sup>-</sup> bacteria was positively associated first with the specific activities of BG,  
306 whereas actinomycetes and G<sup>+</sup> bacteria were positively associated with BG and LAP. Soil fungi were  
307 negatively associated with BG (Fig. 5).

308 3.4 Relationships between SOM decomposition rate, PLFAs, enzyme activity, and microbial  
309 metabolic activities

310 The SOM decomposition rates were significantly and positively related to soil MBC concentrations  
311 but significantly and negatively related to soil DOC concentrations (Fig. 6a and b). Except for amino  
312 acid and amine substrates, the SOM decomposition rates were significantly and positively related to  
313 microbial metabolic activities (AWCD) and carbohydrate substrate use (Fig. 6c and d) and negatively  
314 related to carboxylic acid, polymer, and miscellaneous substrate use (Fig. 6e, g, and i).

315 The SOM decomposition rates were significantly and positively correlated with total PLFAs  
316 ( $r=0.456$ ,  $P=0.005$ ), bacteria ( $r=0.3836$ ,  $P=0.021$ ), actinomycetes ( $r=0.500$ ,  $P=0.002$ ), and G<sup>-</sup>  
317 bacteria PLFAs ( $r=0.520$ ,  $P=0.001$ ) (Fig. 7a, b, d, and f) but were negatively correlated with fungal  
318 PLFAs ( $r=-0.370$ ,  $P=0.026$ ), F/B ( $r=-0.513$ ,  $P=0.001$ ), and the G<sup>+</sup>/G<sup>-</sup> ( $r=-0.496$ ,  $P=0.002$ ) (Fig. 7c,  
319 g, and h). Except for LAP activity, soil enzyme activities were significantly and positively correlated  
320 with the SOM decomposition rates ( $P<0.01$ ) (Fig. 7i, j, and l).

## 321 **4 Discussion**

### 322 4.1 Response of soil labile C and SOM decomposition rates to variations in forest type

323 Soil organic matter is one of the most important C pools in terrestrial ecosystems. The concentrations  
324 of soil DOC in the temperate forests were lower than those in subtropical forests but the soil MBC  
325 concentrations were higher in temperate forests than in subtropical forests. This reflects the results  
326 of previous regional and global studies (Tian et al., 2010; Xu et al., 2013), and shows that the

327 production/consumption ratio of soil DOC was lower, but that microbial C immobilization was higher,  
328 in the high latitude forests than closer to the tropics (Fang et al., 2014). Soil DOC, as a labile SOM  
329 fraction with a rapid turnover, is one of the primary energy sources for microorganisms. The higher  
330 temperatures and precipitation in subtropical and tropical forests lead to higher turnover rates (Fang  
331 et al., 2014), so soil DOC concentrations were highest in subtropical, and MBC concentrations were  
332 lowest, in tropical forests. However, in temperate forests, more C is assimilated into microbial  
333 biomass, so that less C is lost through chemical and physical processes (Liu et al., 2010). Also,  
334 because the decomposition ability of different microbe groups varies, the differences in the soil  
335 microbial communities in different forest ecosystems may also be responsible for the spatial  
336 variations in the soil DOC and MBC concentrations along the NSTEC (Hagedorn et al., 2008).

337 Heterotrophic soil respiration is sustained by the decomposition of SOM. The SOM  
338 decomposition rates along the NSTEC were greater in temperate forests than in subtropical forests,  
339 which was consistent with the variations in the soil MBC and SOC concentrations. These results  
340 indicate that, as found in other studies, large scale SOM decomposition rates are driven by the  
341 amounts of substrate available (Yu et al., 2010). Changes in the availability of C in SOM may affect  
342 the microbial resource strategies, which may in turn influence the SOM decomposition rate.

#### 343 4.2 Mechanisms driving latitudinal variations in microbial substrate use

344 The AWCD reflects the sole C source use ability of the soil microbial community (Garland and Mills,  
345 1991). Of the six groups of C substrates, microbial communities in the temperate forests mainly used  
346 carbohydrates, carboxylic acids, and amino acids, which suggests that microorganisms in temperate  
347 forests probably use high-energy substrates that degrade easily (Kunito et al., 2009). The carbon  
348 substrate use was lowest in the coniferous forest. This shows that, compared with coniferous species,  
349 broadleaved tree species produce root exudates and litter high in water-soluble sugars, organic acids,  
350 and amino acids that are more favorable for microbial activity (Priha et al. 2001). There was no  
351 significant latitudinal pattern in the C metabolic intensity of soil microbes in our study, which was  
352 inconsistent with hypothesis (1). Our results show that MAP only had a moderate effect on the soil  
353 microbial function (Fig. 4). However, there was significant spatial variation in the use of different  
354 carbon sources, which was also related, to a lesser extent, to climate. Consistent with hypothesis (2),

355 soil microbial functions were similar in closely related tree species and diverged as the variability  
356 between tree species and forest types increased (Fig. 4), which suggests that plant traits have more  
357 influence on soil microbial functions than climate.

358 A growing number of studies reported that vegetation type, land use, soil nutrients, and soil  
359 organic matter quality and quantity can determine large scale patterns of microbial communities (de  
360 Vries et al., 2012; Tu et al., 2016). Plant functional traits that are related to growth may determine a  
361 tree species' ability to contribute to the soil carbon pool via leaf litter inputs. For example, it was  
362 previously reported that plant traits such as the leaf N content, SLA, and LDMC could explain  
363 variations in soil nutrients and litter decomposition rates (Eichenberg et al., 2014; Laughlin, 2011).  
364 Therefore, we examined how these plant traits influenced the soil microbial function by latitude. We  
365 found that changes in the soil microbial C substrate use with latitude were mainly related to the soil  
366 silt contents and the CWMs of LDMC, and leaf C and leaf N concentrations, which indicates that the  
367 quality of nutrients from plants had a major influence on microbial carbon use efficiency (Hypothesis  
368 (3)). Plant species with high a SLA, high leaf N concentrations, and low LDMC can produce  
369 bacterial-dominated soil microbial communities in grasslands (Orwin et al., 2010). Looking beyond  
370 individual traits, related tree species may cultivate microbial communities with similar preferences  
371 for carbon sources through coevolution of plants and microbes (Liu et al., 2012b; Buscot, 2015).

372 As hypothesized, the soil microbial community composition was explained by the CWMs of  
373 plant traits at the regional scale. Carbon substrate use was negatively correlated with the CWM of  
374 leaf N concentrations (Table S2, Fig. S2). Bacterially dominated soil microbial communities develop  
375 from leaf litter comprised of N-rich leaves from fast growing species (De Vries et al., 2012), while  
376 leaves with low N concentrations will promote fungal domination (Orwin et al., 2010; De Vries et  
377 al., 2012). In line with this, fungal biomass decreased, and bacterial biomass increased, as the CWM  
378 leaf N content increased, and is associated with fast-growing, N-exploitative plants (Xu et al., 2018).  
379 Leaf N concentrations are considered as indicators of plant growth and resource uptake (Wright et  
380 al., 2004). The results from this study show that, along the NSTEC, high leaf N restrained microbial  
381 C substrate use (Fig.S2) and was a good indicator of the competition between plants for soil N (Pei  
382 et al., 2016). Soil microbes and nearby plants may have been competing for N in the soil.

383 We also found that the C substrate use was negatively correlated with the CWM of leaf C

384 concentrations (Table S2, Fig. S2). Plants at high latitudes may have higher leaf C concentrations  
385 than plants at lower latitudes so that they can balance the osmotic pressure of cells and resist freezing  
386 (Millard et al., 2007; Hoch and Körner, 2012). The increased C was most likely in the form of an  
387 increase in non-structural C, including starch, low molecular weight sugars, and storage lipids that  
388 are easy to break down. Therefore, soil microorganisms from the temperate forests mainly  
389 metabolized high-energy substrates, such as carbohydrates, carboxylic acids, and amino acids.

390 The LDMC is the ratio of the leaf dry weight to the fresh weight and has been used as a proxy  
391 for the ratio of structural compounds to assimilatory tissue (mesophyll and epidermis, Van Arendonk  
392 and Poorter, 1994). High values of LDMC indicate large amounts of vascular tissue, cellulose,  
393 insoluble sugars, and leaf lignin that are difficult to decompose (Poorter and Bergkotte, 1992); C  
394 substrates such as carbohydrates, carboxylic acid, and amino acid are, however, easy to decompose  
395 (Myers et al., 2001). In line with this, the use of carbohydrate, carboxylic acid, and amino acid  
396 substrates was negatively related to the CWMs of the LDMC (Table S2). Pei et al. (2016) reported  
397 that the LDMC was an important driver of multivariate soil microbial community structure and  $G^-$   
398 bacterial abundance.

399 Soil texture regulates soil biological processes and so affects the soil microbial community  
400 structure (Sessitsch et al., 2001). In the present study, microbial C substrate use was significantly and  
401 positively related to the soil silt content. Soil types and textures varied along the NSTEC. Soil texture  
402 influences how microbes use organic matter, and has a strong influence on soil moisture, nutrient  
403 availability, and retention (Veen and Kuikman, 1990). Fine-textured soils with a higher silt content  
404 are known to be more favorable for bacterial growth than soils with a lower silt content because of  
405 their greater water-holding capacity and nutrient availability, and because they are better protected  
406 from bacterial grazers (Carson et al., 2010). We found that the microbial C substrate use was higher  
407 in LS, CB, SN, and JL than in the other forests, reflecting their fine-grained soils and high silt contents,  
408 which ranged from 60% to 80%.

#### 409 4.3 Links between soil microbial community structure and function

410 The soil microbial community structure and functions were significantly correlated along the NSTEC.  
411 Soil carbohydrate and polymer substrate use were mainly related to soil  $G^+$  bacterial and actinomycic

412 biomass, but amines and miscellaneous substrates were mainly related to soil G<sup>-</sup> bacterial, fungal  
413 biomass, and the F/B ratio. Soil bacteria mainly decomposed simple carbohydrates, organic acids,  
414 and amino acids, whereas soil fungi mainly decomposed recalcitrant compounds (Myers et al., 2001;  
415 Treonis et al., 2004). Consistent with this, soil bacterial PLFAs were positively correlated with the  
416 carbohydrate substrate use and the fungal PLFAs were positively related with miscellaneous substrate  
417 use. The results are similar to those reported by Sterner and Elser (2002), who found that fungi tended  
418 to have higher C/N or C/P ratios while heterotrophic bacteria typically have lower C/N or C/P ratios.

419 Shifts in microbial community composition may influence enzyme production (DeForest et al.,  
420 2012; Waldrop et al., 2000; Brockett et al., 2012). Different microbial groups require different  
421 amounts of nutrients to construct biomass, or have enzymes that differ in their affinity for nutrients.  
422 We found that the relative abundances of the G<sup>+</sup> bacteria and actinomycetes communities were  
423 associated with the specific activities of BG, AP, and LAP), whereas the relative abundance of the  
424 G<sup>-</sup> bacteria was correlated with soil NAG activities involved in chitin degradation. In agreement with  
425 our study, numerous other researchers have reported significant correlations between PLFA profiles  
426 and enzyme activities (Waldrop et al., 2000; DeForest et al., 2012; Brockett et al., 2012; Riah-Anglet  
427 et al., 2015). Soil BG was mainly responsible for cellulose degradation and was involved in breaking  
428 down complex organic compounds (cellobiose) into small molecule substrates (glucose) in favor of  
429 acquiring C through microbial community growth (Waldrop et al., 2000). Soil NAG activities were  
430 weakly and positively related with fungal biomass in the present study, and may have been mainly  
431 produced by fungal populations (Valášková et al., 2007). Fungi are commonly considered as  
432 producers of oxidative enzymes. Therefore, the influence of fungal biomass on variations in enzyme  
433 activities was minimal (Kivlin and Treseder, 2014). The linkages between enzyme activity and  
434 community composition may provide some insight into the microbial mechanisms that drive the  
435 decomposition of macromolecular C compounds. These results suggest that that overall ecosystem  
436 functioning may suffer if soil microbial groups are lost.

437 The quality and amounts of SOM are influenced by the biomass, vegetation coverage, root  
438 distribution, and microbial species (Raich and Schlesinger, 1992). The SOM decomposition rates  
439 were higher in temperate forests than in tropical forests and may reflect the higher soil microbial  
440 biomass (Wang et al., 2016). In line with this, SOM decomposition rates were positively related with

441 soil MBC concentrations and different groups of PLFAs. The inverse relationships between SOM  
442 decomposition rates and DOC, carboxylic acids, polymers, and miscellaneous along the NSTEC,  
443 indicate a shift in the soil C turnover from open to closed with increases in the soil labile C  
444 concentrations (Fang et al., 2014). Soil DOC and MBC influence SOM decomposition rates indirectly  
445 by regulating microbial properties (Boberg et al., 2014; Wei et al., 2014). In our study, SOM  
446 decomposition rates were positively related with bacterial PLFAs but negatively with fungal PLFAs.  
447 Because different communities of microbes have different SOM use efficiencies (Balsler and Wixon,  
448 2009; Lipson et al., 2009; Monson et al., 2006), changes in the microbial community structure may  
449 influence the microbial activities and the decomposition rates of organic matter (Lipson et al., 2009;  
450 Keiblinger et al., 2010). The functional dissimilarity of microbes and fungi may help explain these  
451 results. However, we did not measure some key variables, such as the microbial competition and  
452 interactions, and relationship between the microbial diversity and the decomposition rates. Therefore,  
453 in the future, we will use different experimental techniques that will help us gain an improved  
454 understanding of the mechanisms that drive the relationships between the structure and function of  
455 microbial communities.

## 456 **5 Conclusions**

457 In this study, we examined the patterns in labile C concentrations, SOM decomposition rates,  
458 microbial substrate use, and functional diversity and identified a combination of abiotic and biotic  
459 factors that influenced soil microbial functional diversity at the regional scale. The MBC  
460 concentration and SOM decomposition rates were significantly lower, and the soil DOC  
461 concentrations and microbial metabolic activities were higher, in the subtropical and tropical forests  
462 than in the temperate forests. For the first time, we showed that, along with the soil silt content, CWM  
463 plant traits explained variations in soil microbial C substrate use at the regional scale. Soil microbial  
464 community structure and function were strongly related, which suggests that the loss of soil microbial  
465 groups may have consequences for overall ecosystem functioning.

466 *Data accessibility.* Requests for data and materials should be addressed to N.H. (henp@igsnr.ac.cn) and G.Y.  
467 ([yugr@igsnr.ac.cn](mailto:yugr@igsnr.ac.cn)).

468

469 *Author contributions.* Z.W.X., G.R.Y. and X.Y.Z. planned and designed the research. Z.W.X., N.P.H., R.L.W., and  
470 N.Z. conducted fieldwork. Z.W.X., G.R.Y., X.Y.Z., and Q.F.W wrote the manuscript. All authors contributed  
471 critically to the drafts and gave final approval for publication.

472 *Competing interests.* The authors declare that they have no conflict of interest.

473

## 474 **Acknowledgements**

475 This research was jointly supported by the National Natural Science Foundation of China (41601084, 41571251), the  
476 Fundamental Research Funds for the Central Universities (2412019FZ001), Science and Technology Research Project  
477 of Jilin Province (JJKH20190283KJ), the National Key R&D Program of China (2016YFA0602301), and the China  
478 Postdoctoral Science Foundation (2018M631850).

## 479 **References**

- 480 van Arendonk, J.J.C.M., Poorter, H. The chemical composition and anatomical structure of leaves of grass species  
481 differing in relative growth rate, *Plant Cell Environ.*, 17, 963-970, 1994.
- 482 Bååth, E., Anderson, T.H. Comparison of soil fungal/bacterial ratios in a pH gradient using physiological and PLFA-  
483 based techniques, *Soil Biol. Biochem.*, 35, 955-963, 2003.
- 484 Balser, T.C., Firestone, M.K. Linking microbial community composition and soil processes in a California annual  
485 grassland and mixed-conifer forest, *Biogeochemistry*, 73, 395-415, 2005.
- 486 Balser, T.C., Wixon, D.L. Investigating biological control over soil carbon temperature sensitivity, *Global Change*  
487 *Biol.*, 15, 2935-2949, 2009.
- 488 Banerjee, S., Kirkby, C.A., Schmutter, D., Bissett, A., Kirkegaard, J.A., Richardson, A.E. Network analysis reveals  
489 functional redundancy and keystone taxa amongst bacterial and fungal communities during organic matter  
490 decomposition in an arable soil, *Soil Biol. Biochem.*, 97, 188-198, 2016.
- 491 Boberg, J.B., Finlay, R.D., Stenlid, J., Ekblad, A., Lindahl, B.D. Nitrogen and carbon reallocation in fungal mycelia  
492 during decomposition of boreal forest litter, *PLOS ONE*, 9, e92897, 2014.
- 493 Brockett, B.F.T., Prescott, C.E., Grayston, S.J. Soil moisture is the major factor influencing microbial community  
494 structure and enzyme activities across seven biogeoclimatic zones in western Canada, *Soil Biol. Biochem.*, 44,  
495 9-20, 2012.
- 496 Buscot, F. Implication of evolution and diversity in arbuscular and ectomycorrhizal symbioses, *J. Plant Physiol.*, 172,  
497 55-61, 2015.
- 498 Cao, H., Chen, R., Wang, L., Jiang, L., Yang, F., Zheng, S., Wang, G., Lin, X. Soil pH, total phosphorus, climate and  
499 distance are the major factors influencing microbial activity at a regional spatial scale, *Sci. Rep-UK*, 6, 25815,  
500 2016.
- 501 Carson, J.K., Gonzalez-Quinones, V., Murphy, D.V., Hinz, C., Shaw, J.A., Gleeson, D.B. Low pore connectivity  
502 increases bacterial diversity in soil, *Appl. Environ. Microb.*, 76, 3936-3942, 2010.
- 503 Coulis, M., Fromin, N., David, J.-F., Gavinet, J., Clet, A., Devidal, S., Roy, J., Hättenschwiler, S. Functional  
504 dissimilarity across trophic levels as a driver of soil processes in a Mediterranean decomposer system exposed  
505 to two moisture levels, *Oikos*, 124, 1304-1316, 2015..
- 506 De Vries, F.T., Manning, P., Tallowin, J.R., Mortimer, S.R., Pilgrim, E.S., Harrison, K.A., Hobbs, P.J., Quirk, H.,  
507 Shipley, B., Cornelissen, J.H., Kattge, J., Bardgett, R.D. Abiotic drivers and plant traits explain landscape-scale  
508 patterns in soil microbial communities, *Ecol. Lett.*, 15, 1230-1239, 2012.
- 509 Deforest, J., Smemo, K., Burke, D., Elliott, H., Becker, J. Soil microbial responses to elevated phosphorus and pH in  
510 acidic temperate deciduous forests, *Biogeochemistry*, 109, 189-202, 2012.
- 511 Eichenberg, D., Trogisch, S., Huang, Y., He, J.S., Bruelheide, H. Shifts in community leaf functional traits are related  
512 to litter decomposition along a secondary forest succession series in subtropical China. *Journal of Plant Ecology*,  
513 2014. <http://dx.doi.org/10.1093/jpe/rtu021>.
- 514 Fang, H., Cheng, S., Wang, Y., Yu, G., Xu, M., Dang, X., Li, L., Wang, L. Changes in soil heterotrophic respiration,  
515 carbon availability, and microbial function in seven forests along a climate gradient, *Ecol. Res.*, 29, 1077-1086,  
516 2014.
- 517 Fiore, N., Bradford, M. A. Toward an ecological classification of soil bacteria, *Ecology*, 88, 1354-1364, 2007.
- 518 Garland, J.L., Mills, A.L. Classification and characterization of heterotrophic microbial communities on the basis of  
519 patterns of community-level sole carbon source utilization, *Appl. Environ. Microb.*, 57, 2351-2359, 1991.
- 520 Garnier, E., Cortez, J., Billes, G., Navas, M.L., Roumet, C., Debussche, M., Gérard, L., Alain, B., David, A., Astrid,  
521 B., Cathy, N., Jean-Patrick, T. Plant functional markers capture ecosystem properties during secondary

522 succession, *Ecology*, 85, 2630-2637, 2004.

523 Gartzia-Bengoetxea, N., Kandeler, E., Martínez de Arano, I., Arias-González, A. Soil microbial functional activity is  
524 governed by a combination of tree species composition and soil properties in temperate forests, *Appl. Soil Ecol.*,  
525 100, 57-64, 2016.

526 Gomez, E., Ferreras, L., Toresani, S. Soil bacterial functional diversity as influenced by organic amendment  
527 application, *Bioresour. Technol.*, 97, 1484-1489, 2006.

528 Guckert, J.B., Carr, G.J., Johnson, T.D., et al. Community analysis by Biolog: curve integration for statistical analysis  
529 of activated sludge microbial habitats, *J. Microbiol. Meth.*, 27, 183-197, 1996.

530 Huang, Z., Clinton, P.W., Baisden, W.T., Davis, M.R. Long-term nitrogen additions increased surface soil carbon  
531 concentration in a forest plantation despite elevated decomposition, *Soil Biol. Biochem.*, 43, 302-307, 2011.

532 Jagadamma, S., Mayes, M.A., Steinweg, J.M., Schaeffer, S.M. Substrate quality alters the microbial mineralization  
533 of added substrate and soil organic carbon, *Biogeosciences*, 11, 4665-4678, 2014.

534 Jones, D., Willett, V. Experimental evaluation of methods to quantify dissolved organic nitrogen (DON) and dissolved  
535 organic carbon (DOC) in soil, *Soil Biol. Biochem.*, 38, 991-999, 2006.

536 Keiblinger, K.M., Hall, E.K., Wanek, W., Szukics, U., Hammerle, I., Ellersdorfer, G., Bock, S., Strauss, J., Sterflinger,  
537 K., Richter, A., Zechmeister-Boltenstern, S. The effect of resource quantity and resource stoichiometry on  
538 microbial carbon-use-efficiency, *FEMS Microb. Ecol.* 73, 430-440, 2010.

539 Kivlin, S.N. & Treseder, K.K. Soil extracellular enzyme activities correspond with abiotic factors more than fungal  
540 community composition, *Biogeochemistry*, 117, 23-37, 2014.

541 Klimek, B., Chodak, M., Jaźwa, M., Niklińska, M. Functional diversity of soil microbial communities in boreal and  
542 temperate Scots pine forests, *Eur. J. Forest Res.*, 135, 731-742, 2016.

543 Kunito, T., Akagi, Y., Park, H.-D., Toda, H. Influences of nitrogen and phosphorus addition on polyphenol oxidase  
544 activity in a forested Andisol, *Eur. J. Forest Res.*, 128, 361-366, 2009.

545 Laughlin, D.C. Nitrification is linked to dominant leaf traits rather than functional diversity. *Journal of Ecology* 99,  
546 1091-1099, 2011.

547 Lipson, D.A., Monson, R.K., Schmidt, S.K., Weintraub, M.N. The trade-off between growth rate and yield in  
548 microbial communities and the consequences for under-snow soil respiration in a high elevation coniferous forest,  
549 *Biogeochemistry*, 95, 23-35, 2009.

550 Liu, L., Gundersen, P., Zhang, T., and Mo, J. M.: Effects of phosphorus addition on soil microbial biomass and  
551 community composition in three forest types in tropical China, *Soil Biol. Biochem.*, 44, 31-38, 2012a.

552 Liu, X., Liang, M., Etienne, R.S., Wang, Y., Staehelin, C., Yu, S. Experimental evidence for a phylogenetic Janzen-  
553 Connell effect in a subtropical forest, *Ecol. Lett.*, 15, 111-118, 2012b.

554 Liu, Z., Liu, G., Fu, B., Wu, Y., Hu, H., Fu, S. Changes in the soil microbial community with a pine plantation  
555 restoration in a dry valley of the upper reaches of the Minjiang River, southwest China, *Ann N Y Acad. Sci.*,  
556 1195 Suppl 1, E82-95, 2010.

557 Menyailo, O.V., Hungate, B.A., Zech, W. Tree species mediated soil chemical changes in a Siberian artificial  
558 Afforestation experiment. *Plant Soil*, 242, 171-182, 2002.

559 Millard, P., Sommerkorn, M., Grelet, G.A. Environmental change and carbon limitation in trees: a biochemical,  
560 ecophysiological and ecosystem appraisal, *New Phytol.*, 175, 11-28, 2007.

561 Monson, R.K., Lipson, D.L., Burns, S.P., Turnipseed, A.A., Delany, A.C., Williams, M.W., Schmidt, S.K. Winter  
562 forest soil respiration controlled by climate and microbial community composition, *Nature*, 439, 711-714, 2006.

563 Myers, R.T., Zak, D.R., White, D.C., Peacock, A. Landscape-level patterns of microbial community composition and  
564 substrate use in upland forest ecosystems, *Soil Sci. Soc. Am. J.*, 65, 359-367, 2001.

565 Orwin, K.H., Buckland, S.M., Johnson, D., Turner, B.L., Smart, S., Oakley, S., Bardgett, R.D. Linkages of plant traits  
566 to soil properties and the functioning of temperate grassland, *J. Ecol.*, 98, 1074-1083, 2010.

567 Pei, Z., Eichenberg, D., Bruelheide, H., Kröber, W., Kühn, P., Li, Y., von Oheimb, G., Purschke, O., Scholten, T.,  
568 Buscot, F., Gutknecht, J.L.M. Soil and tree species traits both shape soil microbial communities during early  
569 growth of Chinese subtropical forests, *Soil Biol. Biochem.*, 96, 180-190, 2016.

570 Peng, X., Wang, W. Stoichiometry of soil extracellular enzyme activity along a climatic transect in temperate  
571 grasslands of northern China, *Soil Biol. Biochem.*, 98, 74-84, 2016.

572 Philippot, L., Spor, A., Henault, C., Bru, D., Bizouard, F., Jones, C.M., Sarr, A., Maron, P.A. Loss in microbial  
573 diversity affects nitrogen cycling in soil, *ISME J.*, 7, 1609-1619, 2013.

574 Poorter, H., Bergkotte, M. Chemical composition of 24 wild species differing in relative growth rate, *Plant Cell*  
575 *Environ.*, 15, 221-229, 1992.

576 Preston-Mafham, J., Boddy, L., Randerson, P.F. Analysis of microbial community functional diversity using sole-  
577 carbon-source utilisation profiles-a critique, *FEMS Microb. Ecol.*, 42, 1-14, 2002.

578 Priha, O., Grayston, S.J., Hiukka, R., Pennanen, T., Smolander, A. Microbial community structure and characteristics  
579 of the organic matter in soils under *Pinus sylvestris*, *Picea abies* and *Betula pendula* at two forest sites. *Biol*  
580 *Fertil Soils*, 33, 17-24, 2001.

581 Raich, J.W., Clark, D.A., Schwendenmann, L., Wood, T.E. Aboveground tree growth varies with belowground carbon  
582 allocation in a tropical rainforest environment, *PloS one*, 9, e100275, 2014.

583 Riah-Anglet, W., Trinsoutrot-Gattin, I., Martin-Laurent, F., Laroche-Ajzenberg, E., Norini, M.-P., Latour, X., Laval,  
584 K. Soil microbial community structure and function relationships: A heat stress experiment, *Appl. Soil Ecol.*, 86,  
585 121-130, 2015..

586 Russell, A.E., Raich, J.W., Valverde-Barrantes, O.J., Fisher, R.F. Tree species effects on soil properties in experimental  
587 plantations in tropical moist forest, *Soil Sci. Soc. Am. J.*, 71, 1389, 2007.

588 Saiya-Cork, K.R., Sinsabaugh, R.L., Zakb, D.R. The effects of long term nitrogen deposition on extracellular enzyme



589 activity in an *Acer saccharum* forest soil, *Soil Biol. Biochem.*, 34, 1309-1315, 2002.

590 Sessitsch, A., Weilharter, A., Gerzabek, M.H., Kirchmann, H., Kandeler, E. Microbial Population Structures in Soil

591 Particle Size Fractions of a Long-Term Fertilizer Field Experiment, *Appl. Environ. Microb.*, 67, 4215-4224, 2001.

592 Sherman, C., Steinberger, Y. Microbial functional diversity associated with plant litter decomposition along a climatic

593 gradient, *Microb. Ecol.*, 64, 399-415, 2012.

594 Six, J., Elliott, E. T., Paustian, K. Soil structure and soil organic matter: II. A normalized stability index and the effect

595 of mineralogy, *Soil Sci. Soc. Am. J.*, 64, 1042-1049, 2000.

596 Sterner, R. W. & Elser, J. J. Ecological stoichiometry: the biology of elements from molecules to the biosphere.

597 Princeton, New Jersey, USA: Princeton University Press, 2002.

598 Strickland, M.S., Lauber, C., Fierer, N., Bradford, M.A. Testing the functional significance of microbial community

599 composition, *Ecology*, 90, 441-451, 2009.

600 Soil Survey Staff Keys to Soil Taxonomy, 11th ed. USDA-Natural Resources Conservation Service, Washington, DC,

601 2010.

602 Swallow, M.J.B., Quideau, S.A. A method for determining community level physiological profiles of organic soil

603 horizons, *Soil Sci. Soc. Am. J.*, 79, 536-542, 2015.

604 Talbot, J.M., Bruns, T.D., Taylor, J.W., Smith, D.P., Branco, S., Glassman, S.I., Erlandson, S., Vilgalys, R., Liao, H.L.,

605 Smith, M.E., Peay, K.G. Endemism and functional convergence across the North American soil mycobiome, *P.*

606 *Natl. Acad. Sci. USA.*, 111, 6341-6346, 2014.

607 Ter Braak, C.J.F., Smilauer, P. CANOCO Reference manual and CanoDraw for Windows User's guide: Software for

608 Canonical Community Ordination (Version 4.5). Microcomputer, 2002.

609 Tian, H., Chen, G., Zhang, C., Melillo, J.M., Hall, C.A.S., Pattern and variation of C:N:P ratios in China's soils: a

610 synthesis of observational data, *Biogeochemistry*, 98, 139-151 2010.

611 Tian, J., McCormack, L., Wang, J., Guo, D., Wang, Q., Zhang, X., Yu, G., Blagodatskaya, E., Kuzyakov, Y. Linkages

612 between the soil organic matter fractions and the microbial metabolic functional diversity within a broad-leaved

613 Korean pine forest, *Eur. J. Soil Biol.*, 66, 57-64, 2015.

614 Treonis, A.M., Ostle, N.J., Stott, A.W., Primrose, R., Grayston, S.J., Ineson, P. Identification of groups of

615 metabolically-active rhizosphere microorganisms by stable isotope probing of PLFAs, *Soil Biol. Biochem.*, 36,

616 533-537, 2004.

617 Tu, Q., Deng, Y., Yan, Q., Shen, L., Lin, L., He, Z., Wu, L., Van Nostrand, J.D., Buzzard, V., Michaletz, S.T., Enquist,

618 B.J., Weiser, M.D., Kaspari, M., Waide, R.B., Brown, J.H., Zhou, J. Biogeographic patterns of soil diazotrophic

619 communities across six forests in the North America, *Mol. Ecol.*, 25, 2937-2948, 2016.

620 Valášková, V., Šnajdr, J., Bittner, B., Cajthaml, T., Merhautová, V., Hofrichter, M., Baldrian, P. Production of

621 lignocellulose-degrading enzymes and degradation of leaf litter by saprotrophic basidiomycetes isolated from a

622 *Quercus petraea* forest, *Soil Biol. Biochem.*, 39, 2651-2660, 2007.

623 Vance, E.D., Brookes, P.C., Jenkinson, D.S. An extraction method for measuring soil microbial biomass C, *Soil Biol.*

624 *Biochem.*, 19, 703-707, 1987.

625 Veen, J.A.V., Kuikman, P.J. Soil structural aspects of decomposition of organic-matter by micro-organism,

626 *Biogeochemistry*, 11, 213-233, 1990.

627 Waldrop, M.P., Firestone, M.K. Response of microbial community composition and function to soil climate change,

628 *Microb. Ecol.*, 52, 716-724, 2006.

629 Waldrop, M. P., Balsler, T. C. & Firestone, M. K. Linking microbial community composition to function in a tropical

630 soil, *Soil Biol. Biochem.*, 32, 1837-1846, 2000.

631 Wang, Q., He, N., Yu, G., Gao, Y., Wen, X., Wang, R., Koerner, S.E., Yu, Q. Soil microbial respiration rate and

632 temperature sensitivity along a north-south forest transect in eastern China: Patterns and influencing factors, *J.*

633 *Geophys. Res.(Biogeosciences)*, 121, 399-410, 2016.

634 Waring, B.G., Alvarez-Cansino, L., Barry, K.E., Becklund, K.K., Dale, S., Gei, M.G., Keller, A.B., Lopez, O.R.,

635 Markesteijn, L., Mangan, S., Riggs, C.E., Rodriguez-Ronderos, M.E., Segnitz, R.M., Schnitzer, S.A., Powers,

636 J.S. Pervasive and strong effects of plants on soil chemistry: a meta-analysis of individual plant 'Zinke' effects,

637 *Proc. R. Soc. B. The Royal Society*, 282, 20151001, 2015.

638 Wei, H., Guenet, B., Vicca, S., Nunan, N., AbdElgawad, H., Pouteau, V., Shen, W., Janssens, I.A. Thermal acclimation

639 of organic matter decomposition in an artificial forest soil is related to shifts in microbial community structure,

640 *Soil Biol. Biochem.*, 71, 1-12, 2014.

641 Wright, I.J., Reich, P.B., Westoby, M., Ackerly, D.D., Baruch, Z., Bongers, F., et al. The worldwide leaf economics

642 spectrum, *Nature*, 428, 821-827, 2004.

643 Xu, X., Thornton, P.E., Post, W.M. A global analysis of soil microbial biomass carbon, nitrogen and phosphorus in

644 terrestrial ecosystems, *Global Ecol. Biogeogr.*, 22, 737-749, 2013.

645 Xu, Z., Yu, G., Zhang, X., Ge, J., He, N., Wang, Q., Wang, D. The variations in soil microbial communities, enzyme

646 activities and their relationships with soil organic matter decomposition along the northern slope of Changbai

647 Mountain, *Appl. Soil Ecol.*, 86, 19-29, 2015.

648 Xu, Z., Yu, G., Zhang, X., He, N., Wang, Q., Wang, S., Wang, R., Zhao, N., Jia, Y., Wang, C. Soil enzyme activity and

649 stoichiometry in forest ecosystems along the North-South Transect in eastern China (NSTEC), *Soil Biol.*

650 *Biochem.*, 104, 152-163, , 2017.

651 Xu, Z., Yu, G., Zhang, X., He, N., Wang, Q., Wang, S., Xu, X., Wang, R., Zhao, N. Biogeographical patterns of soil

652 microbial community as influenced by soil characteristics and climate across Chinese forest biomes, *Appl. Soil*

653 *Ecol.*, 124, 298-305, 2018.

654 Yu, G., Zheng, Z., Wang, Q., Fu, Y., Zhuang, J., Sun, X., Wang, Y. Spatiotemporal pattern of soil respiration of

655 terrestrial ecosystems in China: the development of a geostatistical model and its simulation., *Environ. Sci.*

- 656 Technol., 44, 6074-6080, 2010.
- 657 Zak, J.C., Willig, M.R., Moorhead, D.L., Wildman, H.G. Functional diversity of microbial communities: a quantitative  
658 approach, *Soil Biol. Biochem.*, 26, 1101-1108, 1994.
- 659 Zhang, X. S., Yang, D. A. Allocation and study on global change transects in China, *Quaternary Sci.*, 1, 43-52, 1995.  
660 (In Chinese)
- 661 Zhou, J., Deng, Y., Shen, L., Wen, C., Yan, Q., Ning, D., Qin, Y., Xue, K., Wu, L., He, Z., Voordeckers, J.W., Nostrand,  
662 J.D., Buzzard, V., Michaletz, S.T., Enquist, B.J., Weiser, M.D., Kaspari, M., Waide, R., Yang, Y., Brown, J.H.  
663 Temperature mediates continental-scale diversity of microbes in forest soils, *Nat. Commun.*, 7, 12083, 2016.

## 664 **Figures legends**

665 **Fig. 1.** Distribution of typical forest ecosystems along the North-South Transect of eastern China (NSTEC). The  
666 abbreviations for the sampling sites from north to south are as follows: HZ, Huzhong; LS, Liangshui; CB, Changbai;  
667 DL, Dongling; TY, Taiyue; SN, Shennong; JL, Julian; DH, Dinghu; JF, Jiangfeng. These abbreviations are used for  
668 the nine forests throughout.

669 **Fig.2.** Variations in soil microbial substrate use during a 240-h incubation for the nine forests. Different colors  
670 represent different forest types: Yellow, coniferous forest; Dark yellow, coniferous broad-leaved mixed forest; Purple,  
671 deciduous broad-leaved forest; Olive, subtropical evergreen broad-leaved forest; Orange, Tropical monsoon forest.  
672 Different lowercase letters indicate significant differences among forests in the same climate zone. The abbreviations  
673 of the sampling sites are given in Table 1.

674 **Fig. 3.** Characteristics of microbial use of (a) carbohydrates, (b) carboxylic acids, (c) amino acids, (d) polymers, (e)  
675 amines, and (f) miscellaneous along the NSTEC. The representatives of different colors were showed in Figure 2.

676 **Fig.4.** Redundancy analysis (RDA) ordination biplot of soil microbial carbon sources use efficiency and  
677 environmental properties. The representatives of different colors were showed in Figure 2. The dotted lines and solid  
678 lines represent the environmental variables and lipid signatures and carbon sources. The abbreviations of the variables  
679 in this figure are as follows: MAP, mean annual precipitation. The vegetation data: LDMC, leaf dry matter weight;  
680 Leaf C, leaf carbon content; Leaf N, leaf nitrogen content; SLA, specific leaf area. Soil properties included SMC, soil  
681 moisture content; Silt, soil silt content; TN, soil total nitrogen; SOC, soil organic carbon. The abbreviations of the  
682 sampling sites were given in Table 1

683 **Fig.5.** The heatmap of the Pearson's correlation coefficients between the use of individual substrates and microbial  
684 PLFAs and soil enzyme activities. Note: The abbreviations of the variables: Actino-, actinomycetes; F/B,  
685 fungi/bacteria; G<sup>+</sup>, gram positive bacteria; G<sup>-</sup>, gram negative bacteria; G<sup>+</sup>/G<sup>-</sup>, Gram-positive bacteria/ Gram-negative  
686 bacteria. BG,  $\beta$ -1, 4-glucosidase; NAG,  $\beta$ -1,4-N-acetylglucosaminidase; LAP, leucine aminopeptidase; AP, acid  
687 phosphatase. \*\* $P < 0.01$ , \* $P < 0.05$ .

688 **Fig. 6.** Relationships between soil carbon mineralization rates ( $\mu\text{g C g}^{-1}\text{d}^{-1}$ ) and microbial biomass C (MBC), soil  
689 dissolved organic C (DOC), average well color development (AWCD), and individual substrate use.

690 **Fig. 7.** Relationships between soil carbon mineralization rates ( $\mu\text{g C g}^{-1}\text{d}^{-1}$ ) and different groups of soil microbial  
691 PLFAs (a-h) and enzyme activities (i-l).

692  
693

## 694 **Supporting information**

695 **Table S1** Average values of forest soil enzyme activities and different PLFA groups along the NSTEC.

696 **Table S2** Plant diversity and community weighted means of plant functional traits

697 **Table S3** Soil organic matter (SOM) decomposition rates during the 28 days of incubation time (Mean  $\pm$  SE) ( $\mu\text{g C}$   
698  $\text{g}^{-1}\text{d}^{-1}$ )

699 **Fig. S1** Variations in the average well color development (AWCD) values during a 240-h incubation for the nine  
700 forests. The abbreviations of the sampling sites are the same as those in Table 1.

701  
702

**Tables**

**Table 1.** The main characteristics of the sampling sites along the North South Transect of East China

| Sampling Sites  | Longitude (E) | Latitude (N) | Elevation (m) | MAT <sup>b</sup> (°C) | MAP <sup>b</sup> (mm) | Vegetation types                                  | Soil type           |
|-----------------|---------------|--------------|---------------|-----------------------|-----------------------|---------------------------------------------------|---------------------|
| HZ <sup>a</sup> | 123°01'12"    | 51°46'48"    | 850           | -3.7                  | 473                   | Cold temperate coniferous forest                  | Spodosols           |
| LS              | 128°53'51"    | 47°11'06"    | 401           | 0.01                  | 648                   | Temperate conifer broad-leaved mixed forest       | Albi-Boric Argosols |
| CB              | 128°05'27"    | 42°24'16"    | 758           | 2.8                   | 691                   | Temperate conifer broad-leaved mixed forest       | Albi-Boric Argosols |
| DL              | 115°25'24"    | 39°57'27"    | 972           | 6.6                   | 539                   | Warm temperate deciduous broad-leaved forest      | Alfisols            |
| TY              | 112°04'39"    | 36°41'43"    | 1668          | 6.0                   | 644                   | Warm temperate deciduous broad-leaved forest      | Alfisols            |
| SN              | 110°29'43"    | 31°19'15"    | 1510          | 8.5                   | 1447                  | Subtropical deciduous evergreen mixed forest      | Inceptisols         |
| JL              | 114°26'28"    | 24°35'05"    | 562           | 18.2                  | 1770                  | Subtropical evergreen broad-leaved forest         | Ultisols            |
| DH              | 112°32'14"    | 23°10'25"    | 240           | 21.8                  | 1927                  | Subtropical monsoon evergreen broad-leaved forest | Ultisols            |
| JF              | 108°51'26"    | 18°44'18"    | 809           | 23.2                  | 2266                  | Tropical monsoon forest                           | Ultisols            |

703 a:HZ, Huzhong; LS, Liangshui; CB, Changbai; DL, Dongling; TY,Taiyue; SN, Shennong; JL, Jiulian; DH, Dinghu; JF, Jiangfeng.

704 b: MAT, mean annual temperature; MAP, mean annual precipitation.

705

**Table 2.** Soil properties of different sampling sites

| Sampling site | pH         | ST<br>(°C) | SMC<br>(%)  | Silt<br>(%) | SOC<br>(g kg <sup>-1</sup> ) | MBC<br>(mg kg <sup>-1</sup> ) | DOC<br>(mg kg <sup>-1</sup> ) | TN<br>(g kg <sup>-1</sup> ) | TP<br>(g kg <sup>-1</sup> ) |
|---------------|------------|------------|-------------|-------------|------------------------------|-------------------------------|-------------------------------|-----------------------------|-----------------------------|
| HZ            | 6.79±0.02a | 10.3±0.15g | 45.3±0.90c  | 56±1.2c     | 42.29±0.47b                  | 350±6.0a                      | 240±7.6e                      | 2.90±0.16d                  | 0.87±0.02b                  |
| LS            | 6.17±0.02b | 15.9±0.02f | 46.9±0.76c  | 64±0.3b     | 62.08±7.20a                  | 316±0.7a                      | 204±4.9f                      | 4.59±0.29b                  | 0.59±0.02c                  |
| CB            | 6.37±0.04b | 16.0±0.06f | 102.8±0.25a | 76±0.6a     | 72.38±2.00a                  | 178±8.8b                      | 314±8.6c                      | 6.05±0.17a                  | 1.67±0.08a                  |
| DL            | 6.87±0.02a | 17.8±0.14e | 32.4±0.30e  | 6±2.4e      | 38.83±0.41c                  | 43±0.8e                       | 284±2.6d                      | 3.17±0.04d                  | 0.56±0.01c                  |
| TY            | 6.85±0.05a | 16.0±0.12f | 36.0±0.23d  | 49±1.4d     | 41.34±2.75c                  | 115±4.0c                      | 226±13.8f                     | 2.43±0.15e                  | 0.52±0.01c                  |
| SN            | 6.93±0.01a | 18.4±0.12d | 50.5±0.63b  | 74±0.3a     | 36.13±1.26c                  | 72±13.1e                      | 311±13.2c                     | 3.76±0.05c                  | 0.81±0.01b                  |
| JL            | 5.57±0.19b | 25.3±0.01a | 39.0±0.89d  | 68±0.3b     | 31.55±1.82c                  | 89±19.7d                      | 387±1.9b                      | 2.28±0.09e                  | 0.36±0.01d                  |
| DH            | 5.43±0.03c | 24.4±0.04b | 37.8±0.38d  | 50±1.8d     | 28.47±0.54d                  | 38±0.1e                       | 334±7.7c                      | 1.77±0.02f                  | 0.20±0.01e                  |
| JF            | 6.32±0.01c | 22.5±0.07c | 38.6±0.12d  | 49±0.2d     | 29.38±0.94d                  | 140±1.3c                      | 458±6.6a                      | 1.99±0.02e                  | 0.15±0.01e                  |

706

Note: ST=temperature of 0–10 cm soil; SMC=soil moisture content; Silt=soil silt content; SOC=soil organic carbon; MBC=microbial biomass carbon; DOC=dissolved organic carbon; TN=soil total nitrogen; TP=soil total phosphorus. Values were presented as means ± SE (n=4). The abbreviations of the sampling sites were given in the Table 1.

707

708

**Table 3.** Functional diversity of soil microbial communities in forest ecosystems along the NSTEC

| <b>Sampling sites</b> | <b>Richness (R)</b> | <b>Shannon <math>H'</math></b> | <b>Shannon <math>E</math></b> | <b>Simpson <math>D</math></b> |
|-----------------------|---------------------|--------------------------------|-------------------------------|-------------------------------|
| <b>HZ</b>             | 14.08±0.34d         | 2.65±0.03d                     | 1.01±0.007b                   | 0.91±0.002c                   |
| <b>LS</b>             | 25.29±0.14b         | 3.12±0.02b                     | 0.98±0.003c                   | 0.95±0.001a                   |
| <b>CB</b>             | 27.00±0.27a         | 3.22±0.01a                     | 0.98±0.001c                   | 0.95±0.001a                   |
| <b>DL</b>             | 11.54±0.47e         | 2.52±0.03e                     | 1.04±0.010a                   | 0.87±0.005d                   |
| <b>TY</b>             | 22.33±0.87c         | 3.02±0.02c                     | 0.98±0.002c                   | 0.94±0.001a                   |
| <b>SN</b>             | 28.10±0.34a         | 3.24±0.01a                     | 0.97±0.001c                   | 0.95±0.001a                   |
| <b>JL</b>             | 23.54±0.07c         | 3.04±0.01c                     | 0.96±0.001c                   | 0.93±0.003b                   |
| <b>DH</b>             | 25.65±0.71b         | 3.11±0.01b                     | 0.97±0.001c                   | 0.93±0.002b                   |
| <b>JF</b>             | 27.63±0.68a         | 3.19±0.02a                     | 0.96±0.001c                   | 0.95±0.002a                   |

709

Indices were calculated based on the optical density values after incubation for 96 h. Data are expressed as means±standard errors. Different lowercase letters indicate significant differences among forests. The abbreviations of the sampling sites are the same as those used in Table 1.

710

711



713 **Figure 1.** Distribution of typical forest ecosystems along the North-South Transect of eastern China (NSTEC).  
 714 The abbreviations of sampling sites from north to south are as follows: HZ, Huzhong; LS, Liangshui; CB,  
 715 Changbai; DL, Dongling; TY, Taiyue; SN, Shennong; JL, Jiulian; DH, Dinghu; JF, Jiangfeng.  
 716



717  
718  
719  
720  
721  
722

**Figure 2.** Variations in soil microbial substrate use during a 240-h incubation for the nine forests. Different colors represent different forest types: Yellow, coniferous forest; Dark yellow, coniferous broad-leaved mixed forest; Purple, deciduous broad-leaved forest; Olive, subtropical evergreen broad-leaved forest; Orange, Tropical monsoon forest. Different lowercase letters indicate significant differences among forests in the same climate zone. The abbreviations of the sampling sites are given in Table 1.





723  
724  
725  
726

**Figure 3.** Characteristics of microbial use of (a) carbohydrates, (b) carboxylic acids, (c) amino acids, (d) polymers, (e) amines, and (f) miscellaneous along the NSTEC. The representatives of different colors were showed in Figure 2.



727  
728  
729  
730  
731  
732  
733  
734

**Figure 4.** Redundancy analysis (RDA) ordination biplot of soil microbial carbon sources use efficiency and environmental properties. The representatives of different colors were showed in Figure 2. The dotted lines and solid lines represent the environmental variables and lipid signatures and carbon sources. The abbreviations of the variables in this figure are as follows: MAP, mean annual precipitation. The vegetation data: LDMC, leaf dry matter weight; Leaf C, leaf carbon content; Leaf N, leaf nitrogen content; SLA, specific leaf area. Soil properties included SMC, soil moisture content; Silt, soil silt content; TN, soil total nitrogen; SOC, soil organic carbon. The abbreviations of the sampling sites were given in Table 1.

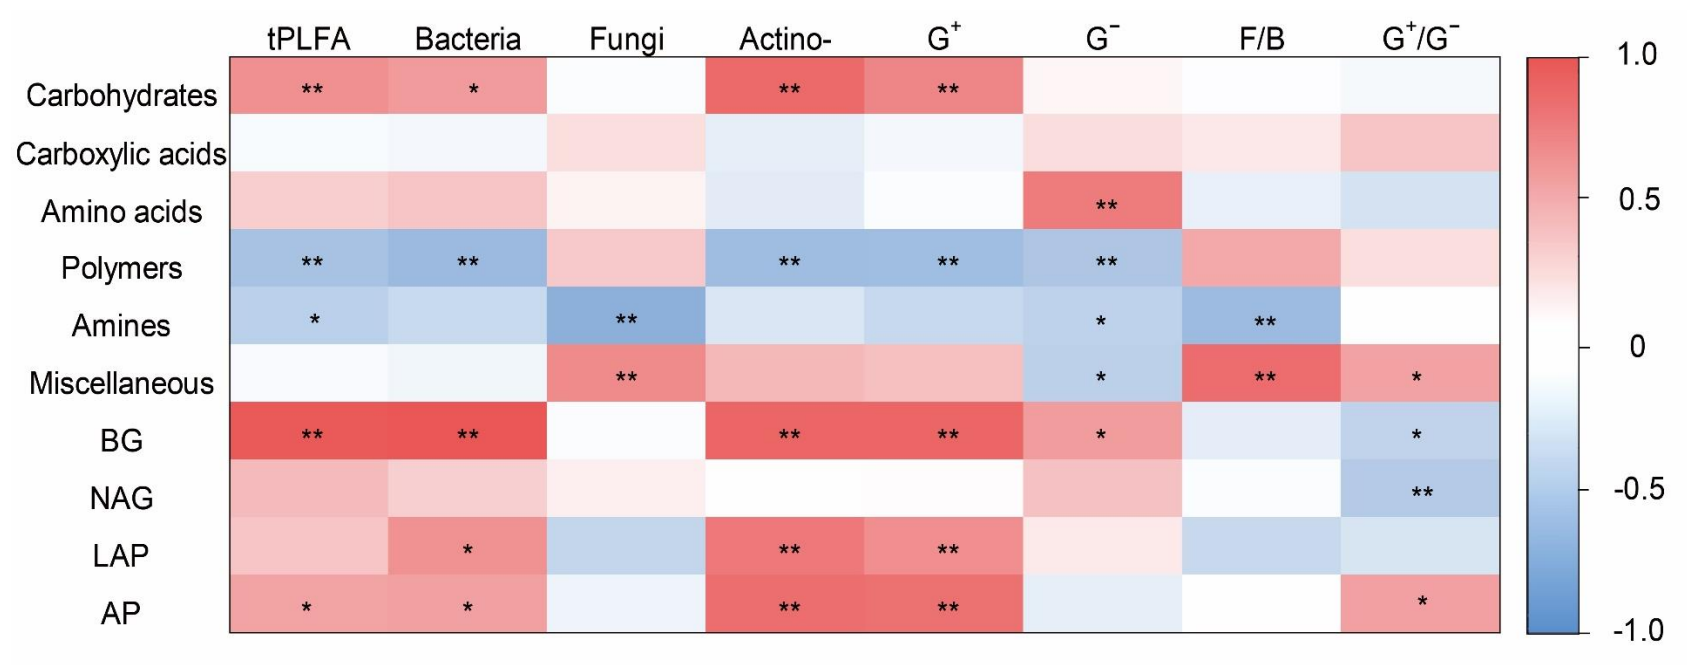

**Figure 5.** The heatmap of the Pearson's correlation coefficients between the use of individual substrates and microbial PLFAs and soil enzyme activities. Note: The abbreviations of the variables:

Actino-, actinomycetes; F/B, fungi/bacteria; G<sup>+</sup>, gram positive bacteria; G<sup>-</sup>, gram negative bacteria; G<sup>+</sup>/G<sup>-</sup>, Gram-positive bacteria/ Gram-negative bacteria. BG, β-1, 4-glucosidase; NAG, β-1,4-

N-acetylglucosaminidase; LAP, leucine aminopeptidase; AP, acid phosphatase. \*\**P* < 0.01, \**P* < 0.05.

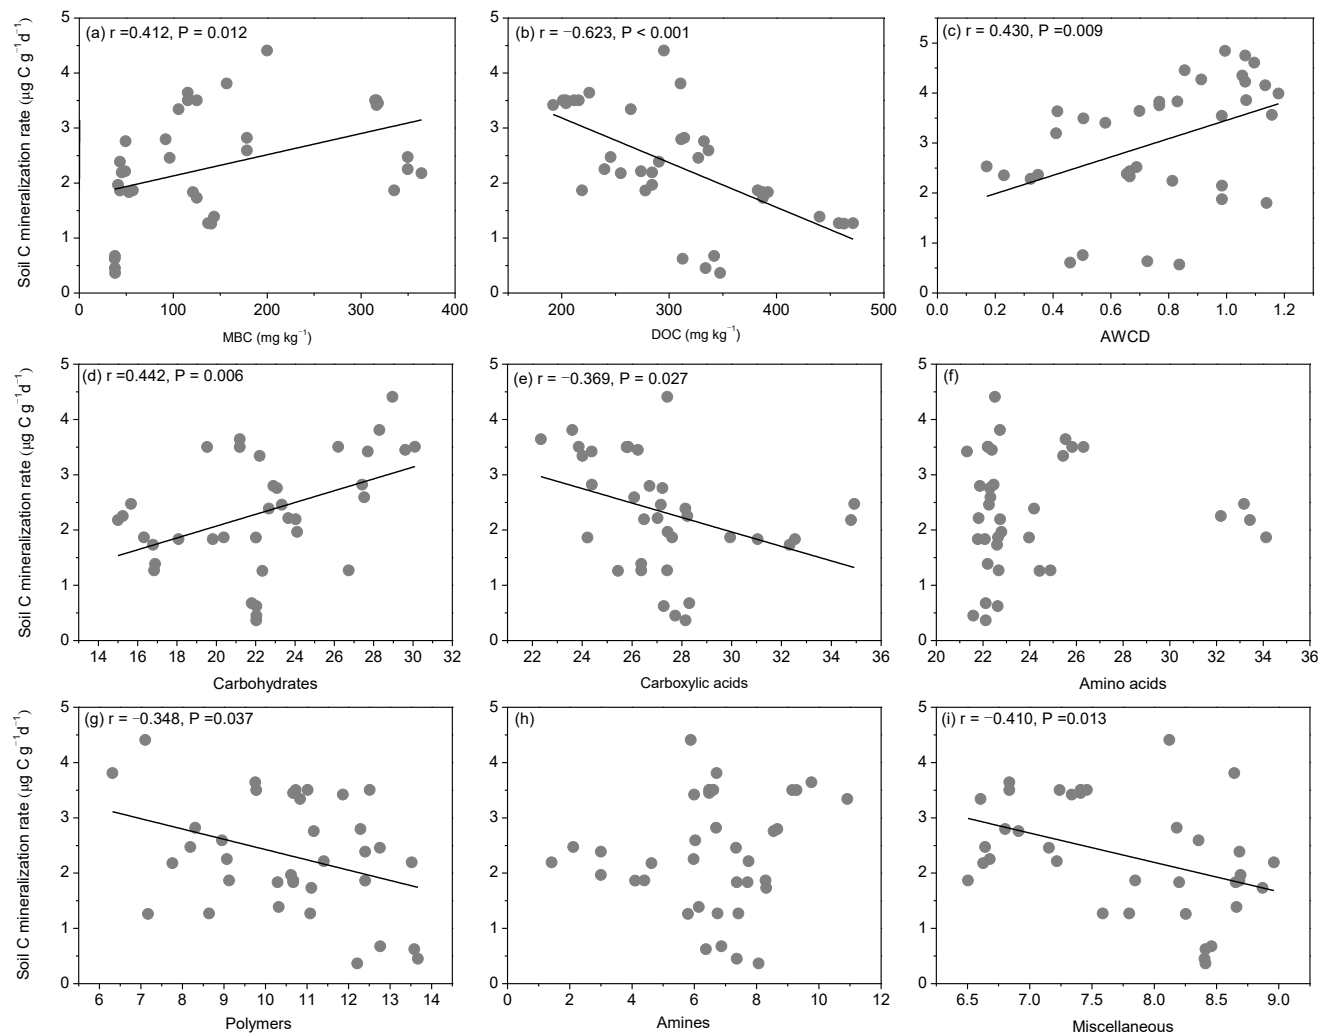

**Figure 6.** Relationships between soil carbon mineralization rates ( $\mu\text{g C g}^{-1} \text{d}^{-1}$ ) and microbial biomass C (MBC), soil dissolved organic C (DOC), average well color development (AWCD), and

use of individual substrates.

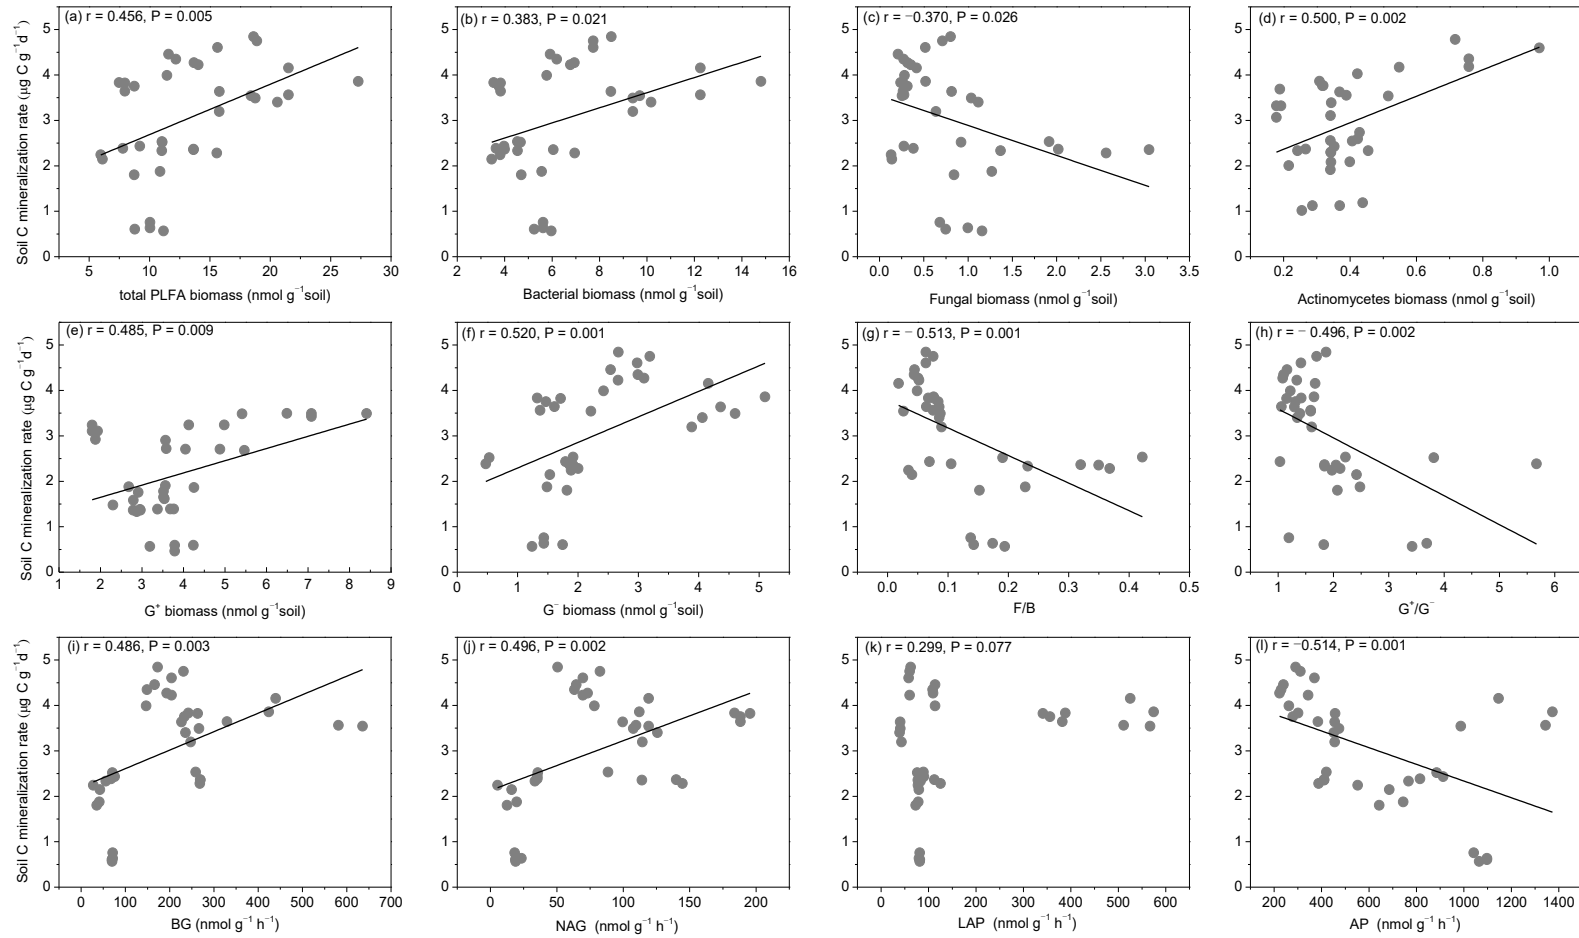

**Figure 7.** Relationships between soil carbon mineralization rates ( $\mu\text{g C g}^{-1} \text{d}^{-1}$ ) and different groups of soil microbial PLFAs (a-h) and enzyme activities (i-l).

Table S1 Average values of forest soil enzyme activity and different group of PLFAs along the NSTEC.

| Sampling site | Enzyme activities |          |          |           |          | PLFAs     |          |         |            |                |                |                                |
|---------------|-------------------|----------|----------|-----------|----------|-----------|----------|---------|------------|----------------|----------------|--------------------------------|
|               | BG                | NAG      | LAP      | AP        | tPLFA    | Bacteria  | Fungi    | Acti-   | F/B        | G <sup>+</sup> | G <sup>-</sup> | G <sup>+</sup> /G <sup>-</sup> |
| HZ            | 244±8.6           | 111±5.5  | 41±0.8   | 459±5.0   | 17.7±1.2 | 9.4 ±0.4  | 0.9±0.1  | 0.4±0.2 | 0.09 ±0.01 | 4.5±0.4        | 4.23±0.2       | 1.4±0.1                        |
| LS            | 203±12.0          | 68±6.6   | 60±0.8   | 3297±17.5 | 16.8±1.2 | 7.9±0.4   | 0.6±0.1  | 0.5±0.4 | 0.06±0.01  | 4.5±0.4        | 2.88±0.1       | 1.6±0.1                        |
| CB            | 520±52.3          | 115±2.4  | 545±15.5 | 1213±90.6 | 22.2±1.9 | 12.3± 1.0 | 0.4±0.1  | 0.8±0.1 | 0.05±0.02  | 7.3± 0.4       | 3.21±0.9       | 1.6±0.1                        |
| DL            | 266±2.5           | 122±12.9 | 101±10.9 | 407±6.9   | 13.5±0.9 | 5.4±0.7   | 2.4±0.3  | 0.3±0.3 | 0.36±0.02  | 3.52±0.3       | 1.92±0.1       | 2.1±0.1                        |
| TY            | 267±21.9          | 189±2.4  | 367±11.1 | 356±41.0  | 8.0±0.3  | 3.7±0.1   | 0.3±0.1  | 0.2±0.1 | 0.07±0.01  | 1.85±0.1       | 1.53±0.1       | 1.2±0.1                        |
| SN            | 163±10.7          | 70±3.6   | 111±1.3  | 239±8.6   | 12.2±0.5 | 6.2±0.3   | 0.3±0.1  | 0.3±0.1 | 0.05±0.01  | 3.02±0.1       | 2.76±0.2       | 1.1±0.1                        |
| JL            | 67±4.3            | 35±0.5   | 83±2.9   | 845±33.2  | 9.8±0.8  | 4.2±0.2   | 0.7±0.3  | 0.3±0.1 | 0.15±0.04  | 3.17±0.2       | 1.18±0.4       | 3.1±1.0                        |
| DH            | 71±0.4            | 20±1.2   | 81±0.4   | 1075±13.6 | 10.0±0.5 | 5.6±0.2   | 0.9±0.1  | 0.3±0.1 | 0.16±0.01  | 3.75±0.2       | 1.46±0.1       | 2.5±0.6                        |
| JF            | 37±3.4            | 14±3.1   | 77±1.4   | 656±40.5  | 7.9±1.2  | 4.4±0.5   | 0.6± 0.3 | 0.3±0.1 | 0.11±0.05  | 3.16±0.4       | 1.68±0.1       | 2.2±0.1                        |

All values are presented as means ± SE (n=4). The enzyme activity (nmol·h<sup>-1</sup> g<sup>-1</sup> dry soil) and PLFAs (nmol·g<sup>-1</sup> dry soil). C acquisition is represented by β-1,4-glucosidase (BG); N acquisition is measured by the potential activities of β-1,4-N-acetylglucosaminidase (NAG) and leucine aminopeptidase (LAP); P acquisition is measured as acid (alkaline) phosphatase (AP) activity. tPLFA, total PLFAs, Acti-, actinomycetes, F/B, fungi/bacteria; G<sup>+</sup>/G<sup>-</sup>, Gram-positive bacteria/ Gram-negative bacteria. The abbreviations of the sampling sites were showed in table 1.

**Table S2** The plant diversity and community weighted means of plant functional traits

| Sites | H'   | LDMC<br>(mg g <sup>-1</sup> ) | SLA<br>(m <sup>2</sup> kg <sup>-1</sup> ) | Leaf C<br>(g kg <sup>-1</sup> ) | Leaf N<br>(g kg <sup>-1</sup> ) |
|-------|------|-------------------------------|-------------------------------------------|---------------------------------|---------------------------------|
| HZ    | 0.53 | 365.6                         | 8.5                                       | 487.5                           | 19.4                            |
| LS    | 2.05 | 345.5                         | 12.1                                      | 441.6                           | 18.5                            |
| CB    | 2.14 | 287.8                         | 18.5                                      | 108.7                           | 6.12                            |
| DL    | 2.74 | 408.1                         | 11.3                                      | 447.6                           | 25.1                            |
| TY    | 1.01 | 421.6                         | 9.5                                       | 494.0                           | 19.5                            |
| SN    | 2.61 | 289.8                         | 8.7                                       | 332.7                           | 13.5                            |
| JL    | 2.73 | 359.3                         | 6.2                                       | 392.6                           | 14.2                            |
| DH    | 2.09 | 412.2                         | 6.4                                       | 463.1                           | 16.2                            |
| JF    | 4.08 | nd                            | nd                                        | nd                              | nd                              |

H': the diversity of the tree species; LDMC: the oven-dried mass of a leaf divided by its water-saturated fresh mass, SLA: the one-sided area of a fresh leaf divided by its oven-dried mass; Leaf C: Leaf carbon concentration; Leaf N: Leaf nitrogen concentration. nd: none detected. The abbreviations of the sampling sites were showed in table 1.

**Table S3** The soil organic matter (SOM) decomposition rates during the 28 days of incubation time (Mean  $\pm$  SE) ( $\mu\text{gC}\cdot\text{g}^{-1}\text{d}^{-1}$ )

| Sites | 1d               | 7d               | 14d              | 21d              | 28d              | Average          |
|-------|------------------|------------------|------------------|------------------|------------------|------------------|
| HZ    | 3.23 $\pm$ 0.24c | 4.69 $\pm$ 0.27a | 3.40 $\pm$ 0.17b | 3.64 $\pm$ 0.03a | 2.19 $\pm$ 0.13b | 3.43 $\pm$ 0.09b |
| LS    | 6.17 $\pm$ 0.19a | 4.60 $\pm$ 0.44a | 4.97 $\pm$ 0.17a | 3.83 $\pm$ 0.17a | 3.47 $\pm$ 0.02a | 4.61 $\pm$ 0.14a |
| CB    | 3.74 $\pm$ 0.13b | 4.27 $\pm$ 0.23b | 3.36 $\pm$ 0.13b | 4.11 $\pm$ 0.09a | 3.41 $\pm$ 0.43a | 3.78 $\pm$ 0.14b |
| DL    | 2.82 $\pm$ 0.13d | 2.66 $\pm$ 0.08c | 1.96 $\pm$ 0.04c | 2.38 $\pm$ 0.02c | 2.10 $\pm$ 0.12b | 2.38 $\pm$ 0.05d |
| TY    | 3.92 $\pm$ 0.27b | 3.87 $\pm$ 0.20b | 3.75 $\pm$ 0.36b | 3.77 $\pm$ 0.04a | 3.50 $\pm$ 0.06a | 3.76 $\pm$ 0.04b |
| SN    | 6.36 $\pm$ 0.19a | 5.36 $\pm$ 0.24a | 3.87 $\pm$ 0.08b | 3.19 $\pm$ 0.16b | 2.56 $\pm$ 0.14b | 4.27 $\pm$ 0.10a |
| JL    | 2.88 $\pm$ 0.08d | 2.29 $\pm$ 0.09c | 2.40 $\pm$ 0.08c | 2.70 $\pm$ 0.08c | 1.82 $\pm$ 0.03c | 2.42 $\pm$ 0.04d |
| DH    | 0.74 $\pm$ 0.05e | 0.58 $\pm$ 0.06d | 0.33 $\pm$ 0.01d | 1.03 $\pm$ 0.12d | 0.53 $\pm$ 0.07e | 0.64 $\pm$ 0.04f |
| JF    | 2.21 $\pm$ 0.06d | 1.71 $\pm$ 0.20c | 1.72 $\pm$ 0.29c | 3.14 $\pm$ 0.09b | 1.30 $\pm$ 0.03d | 2.02 $\pm$ 0.11e |

Data labeled with different letters indicated soil organic matter (SOM) decomposition rates were significantly different at  $P < 0.01$ . The abbreviations of the sampling sites were given in the Table 1.





**Fig.S1** Variation of the average well color development (AWCD) values during a 240-h incubation for the nine forests. The abbreviations of the sampling sites were showed in table 1.

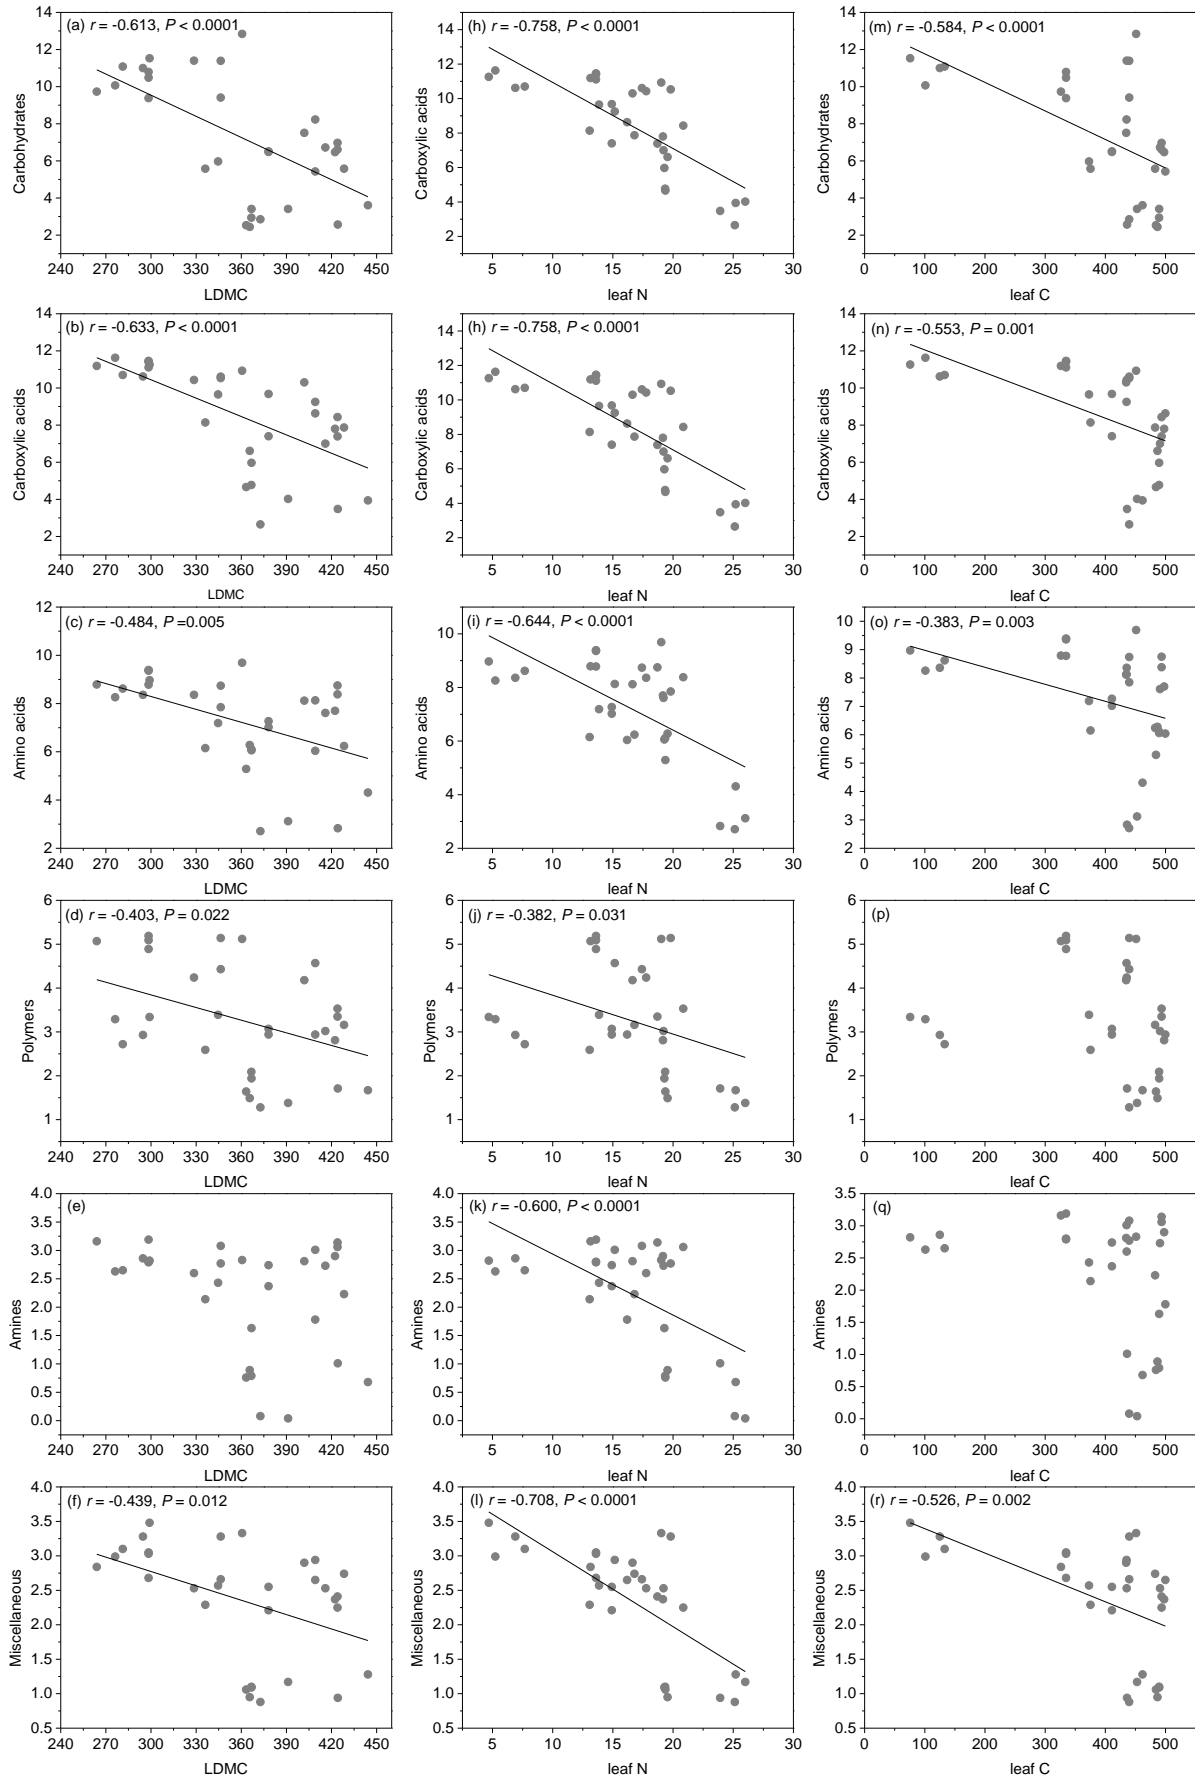

1  
2  
3

Fig.S2 The Pearson's correlation coefficients between the use of individual substrates and plant functional traits.
